# Supplementary figures and images for: Low molecular weight MPEG-assisted organic synthesis
Source: Royal Society of Chemistry journal article supplement (doi:10.1039/c0cc00415d), 2010-01-01

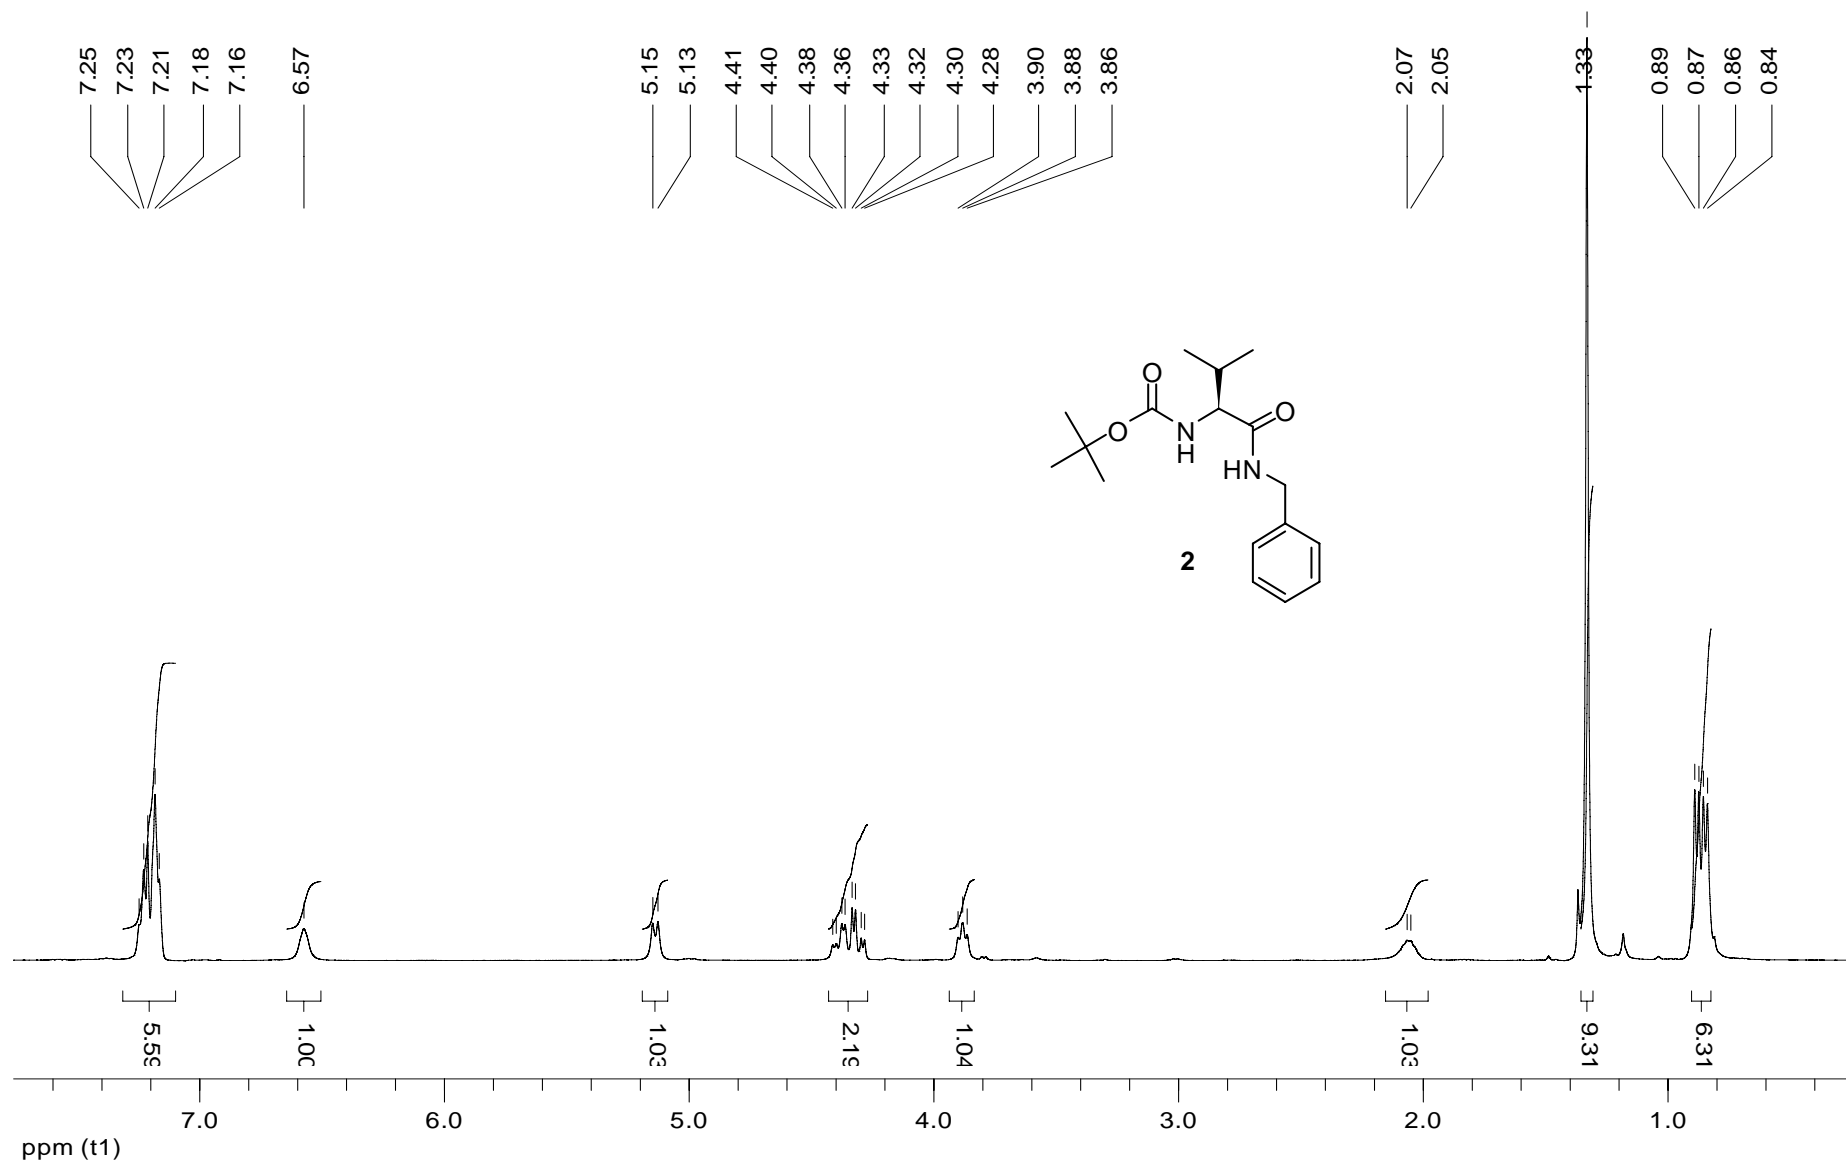

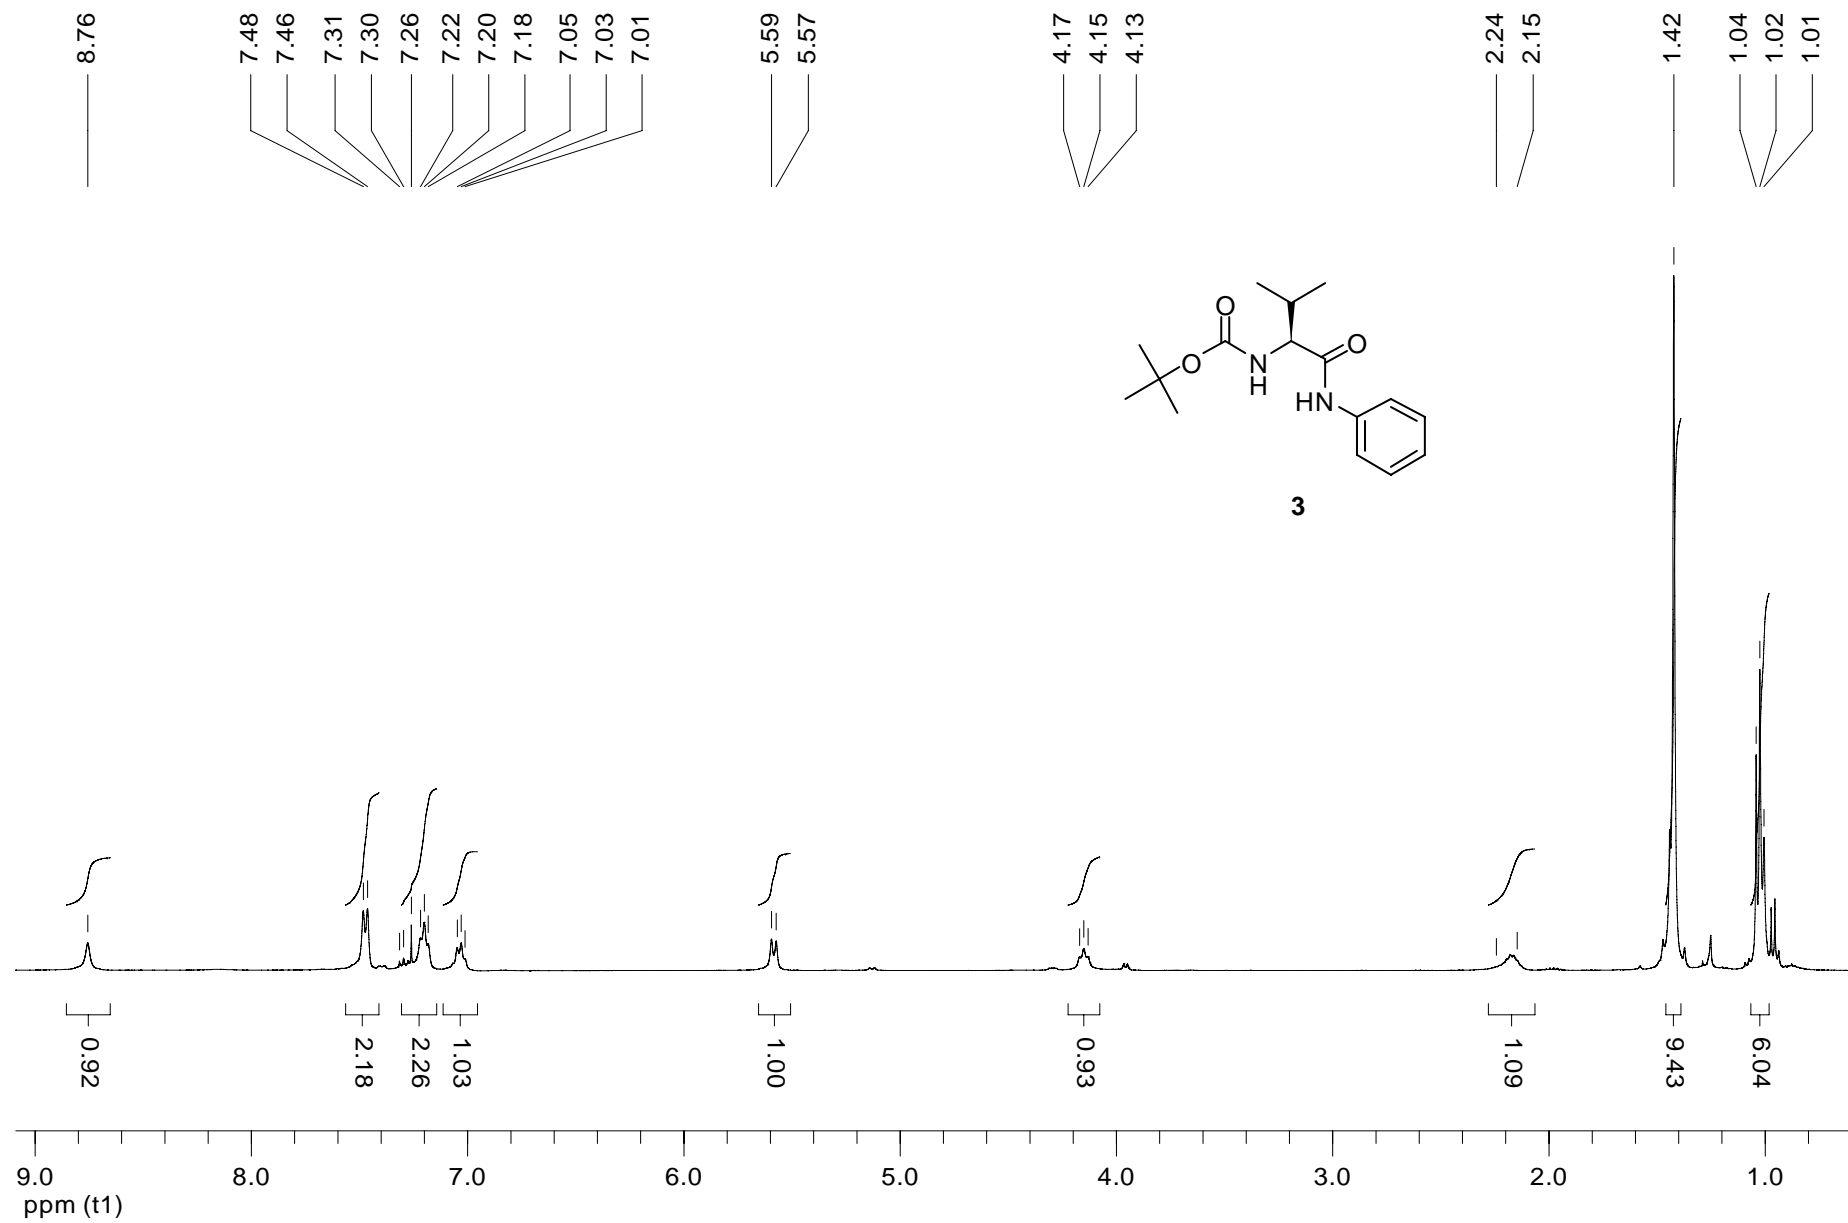

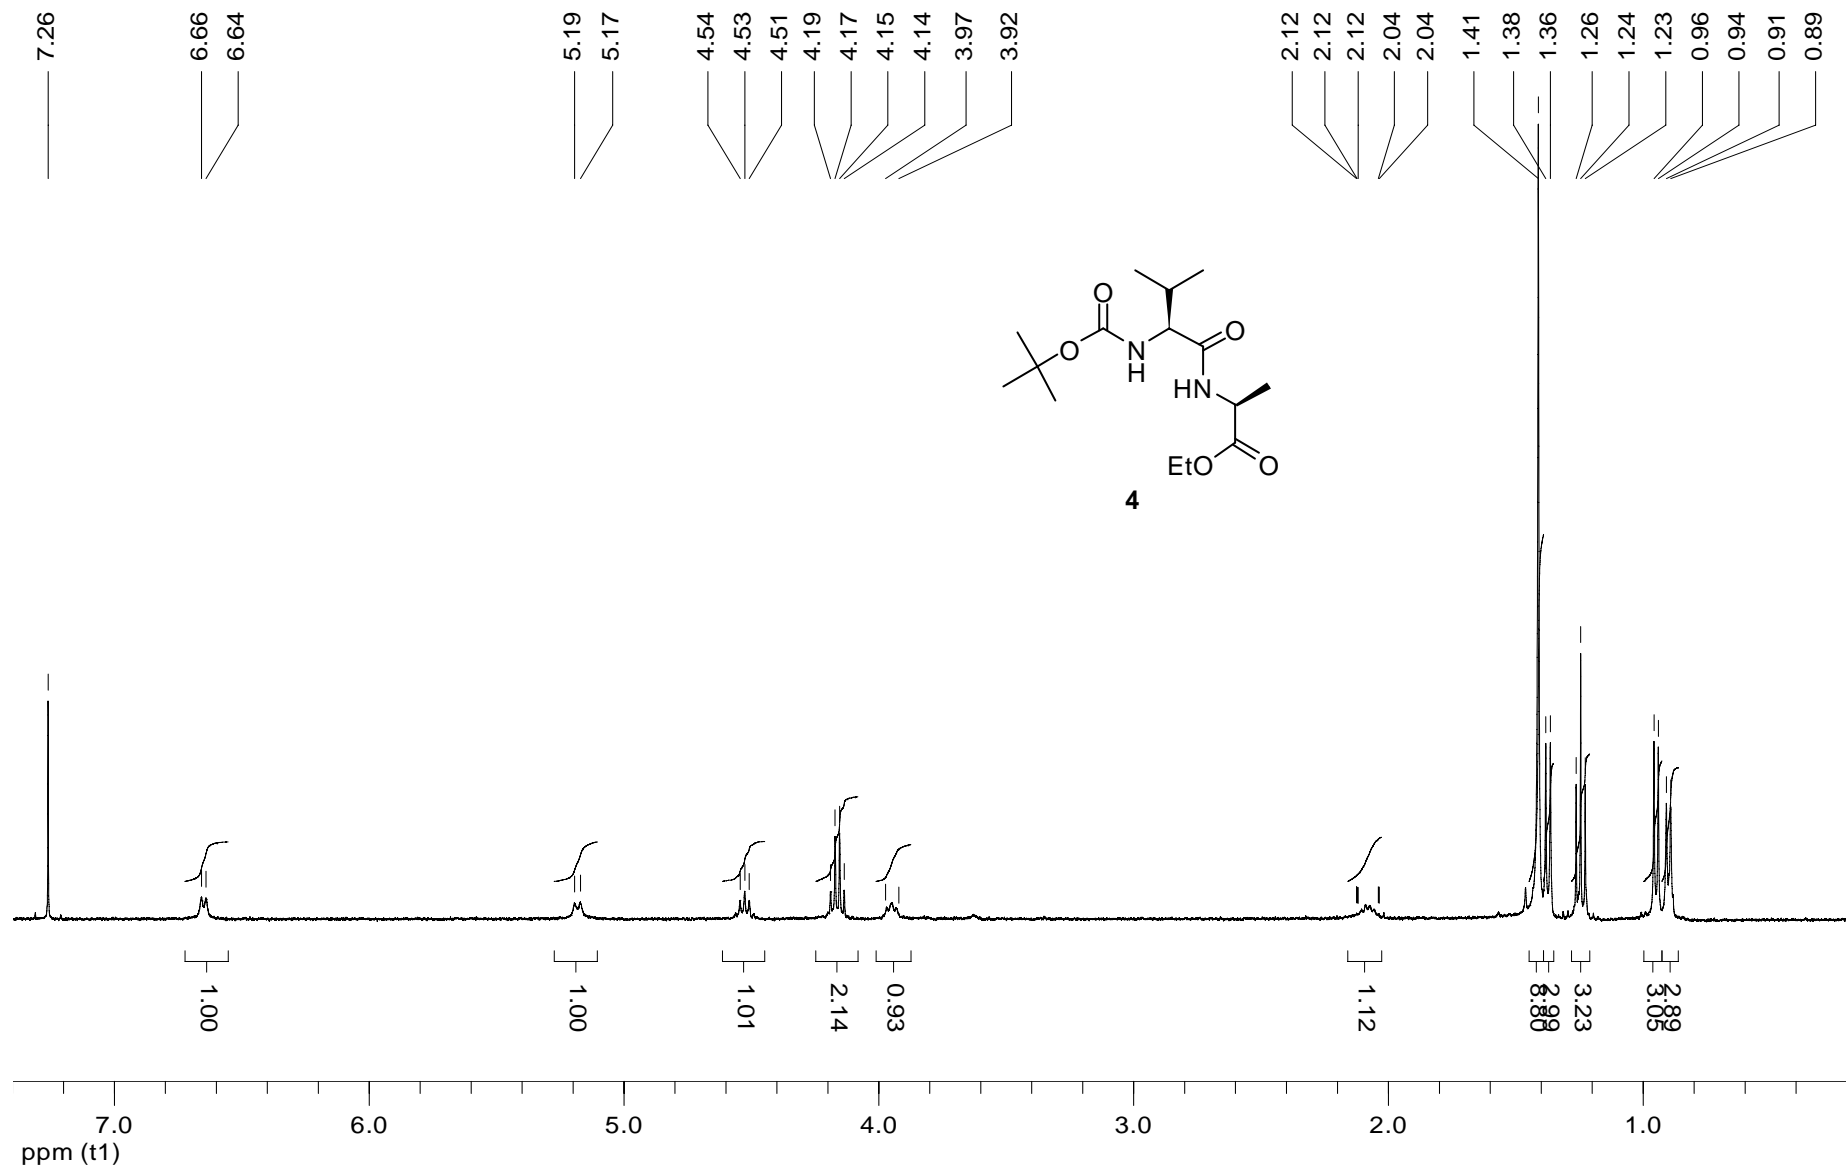

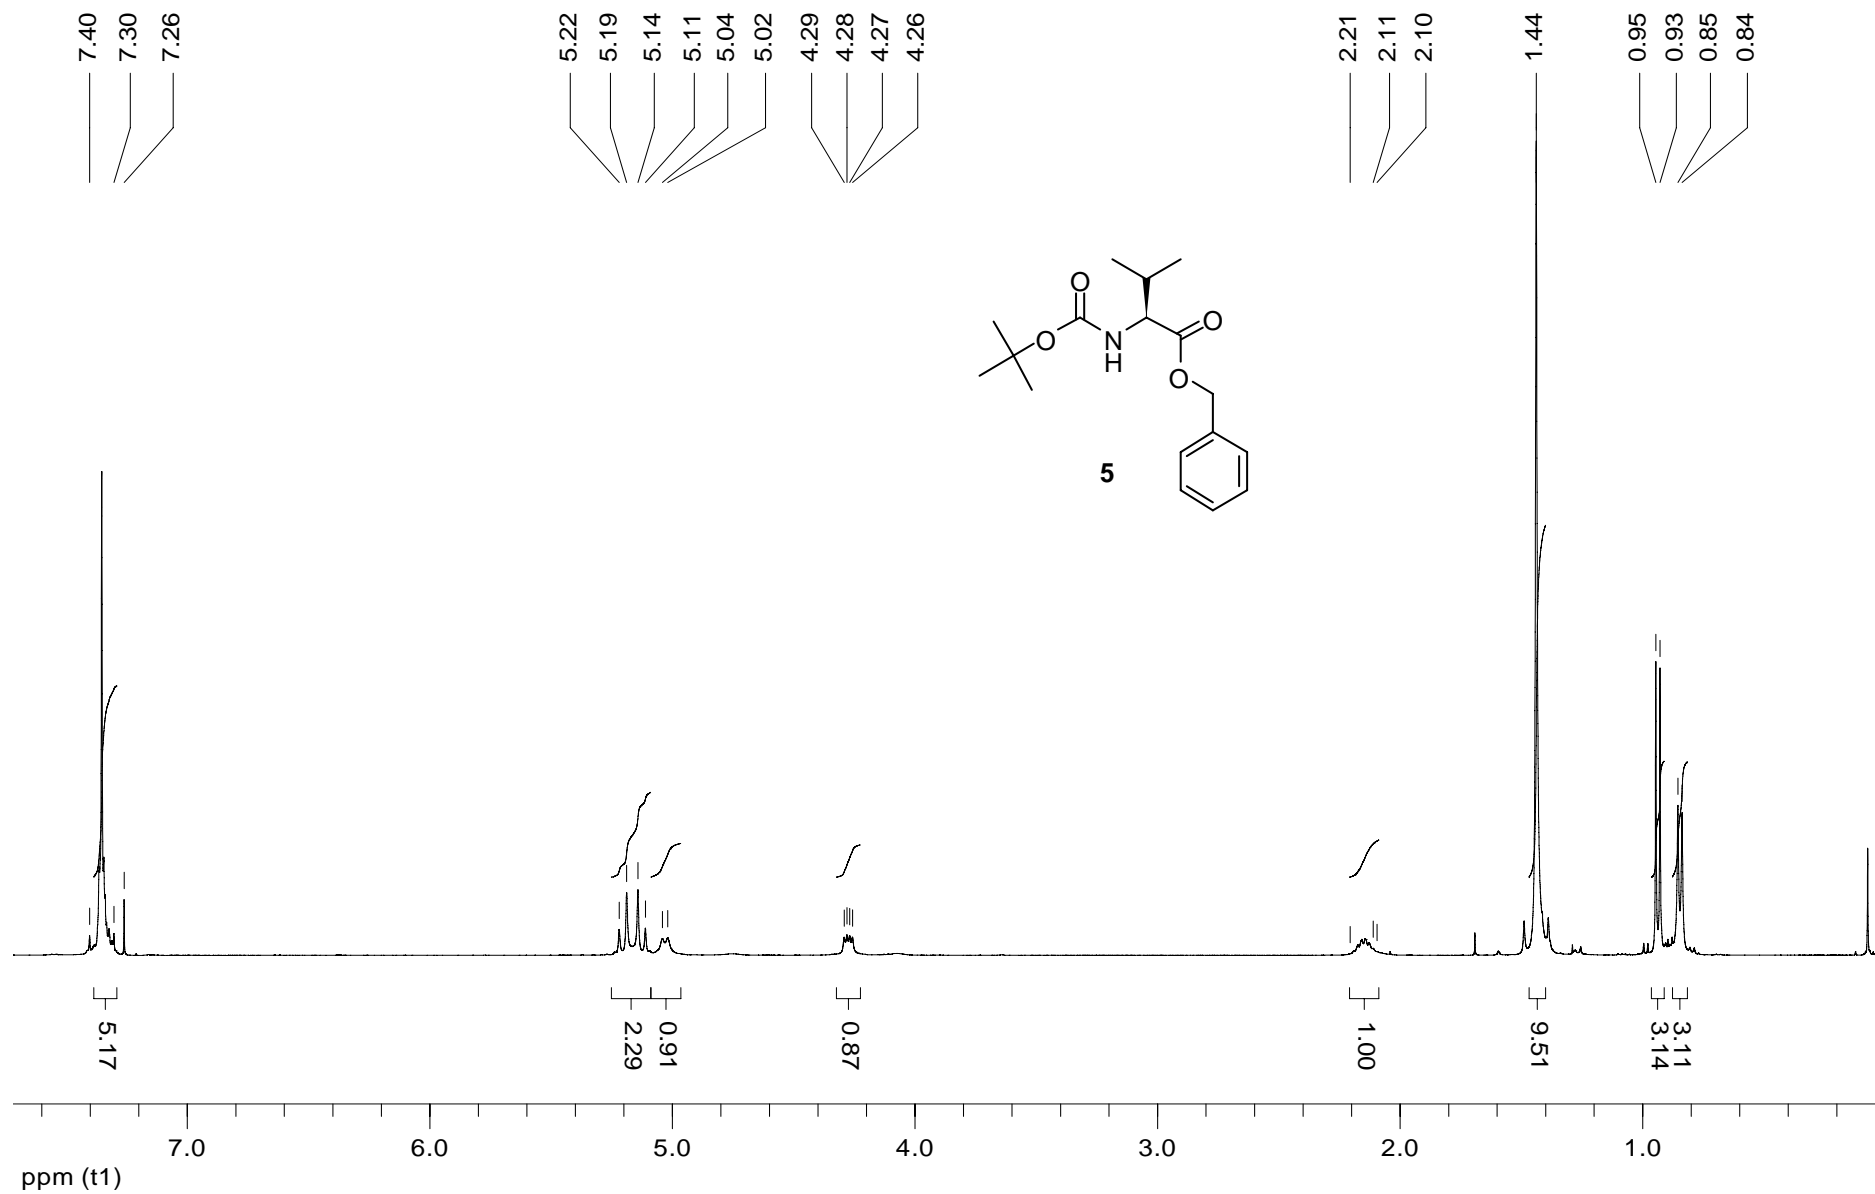

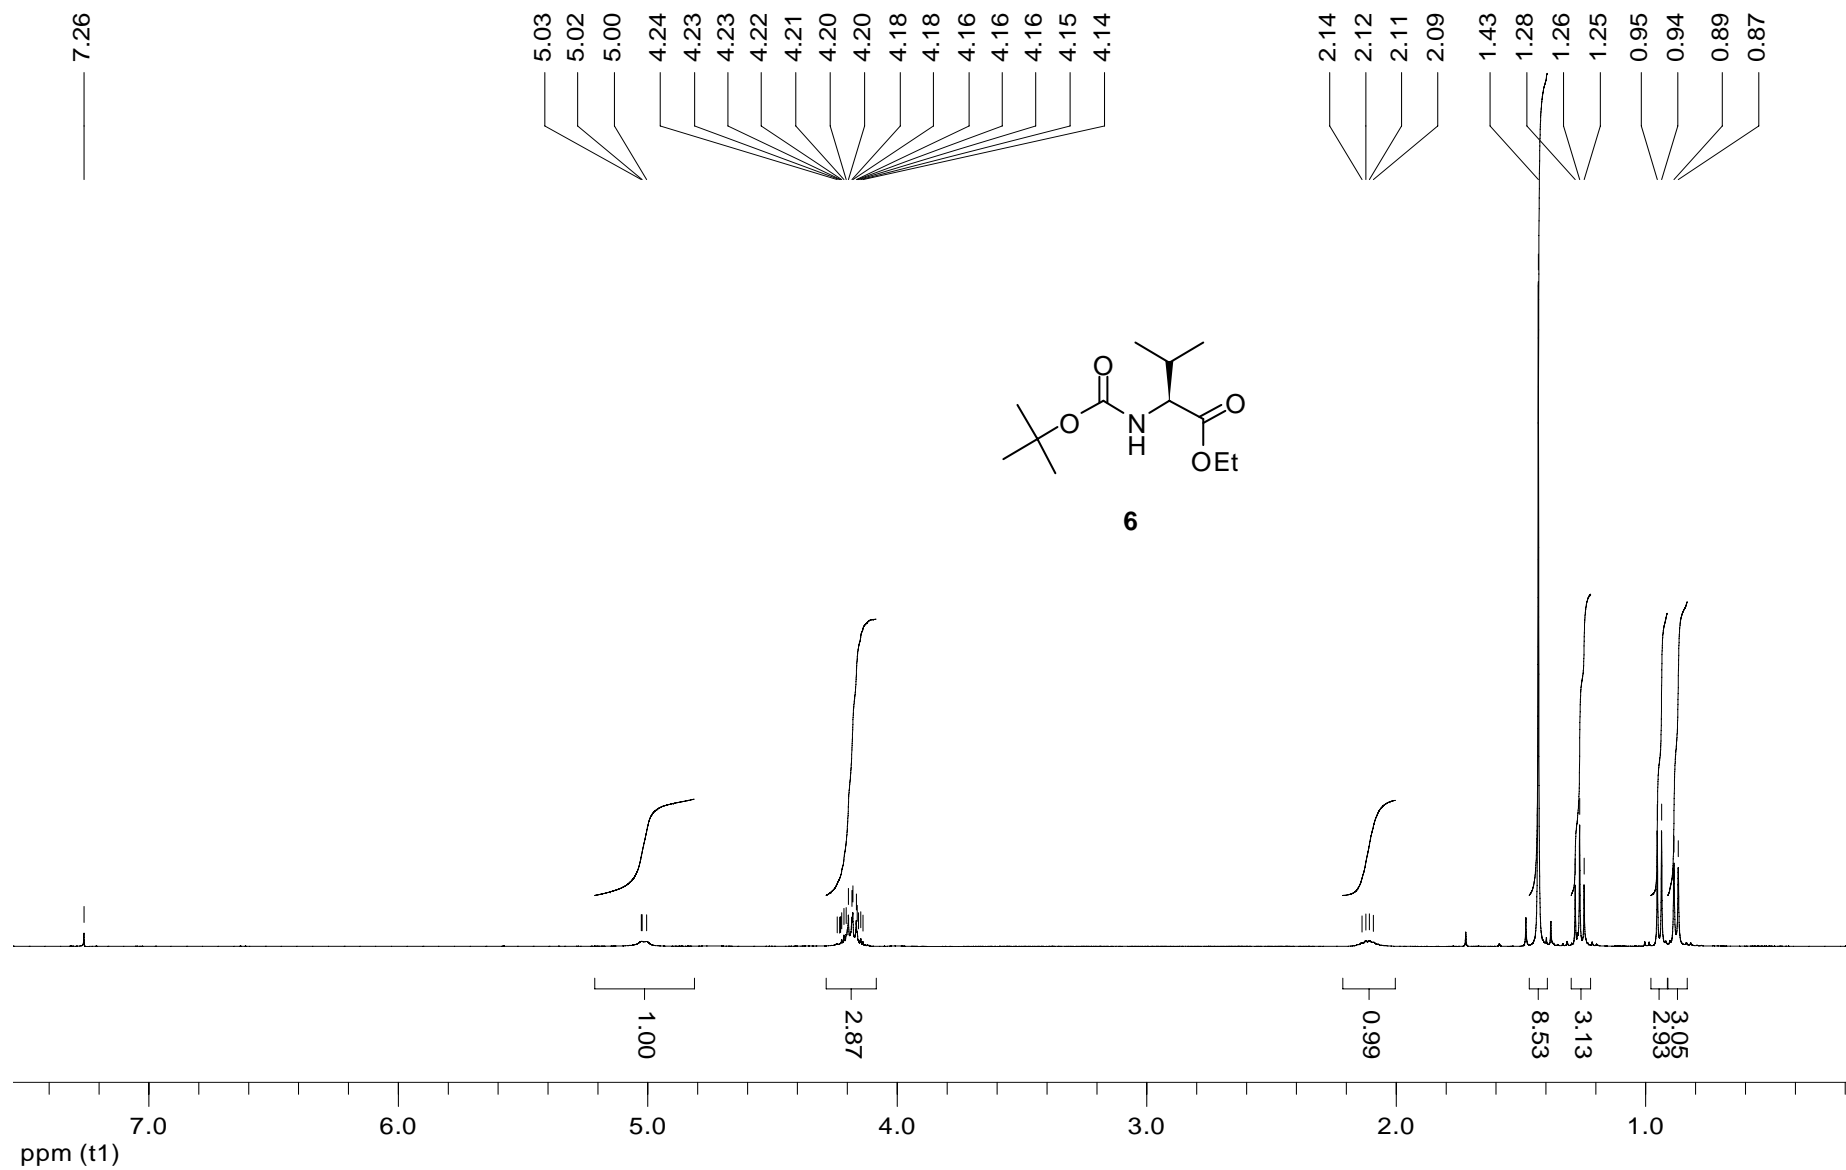

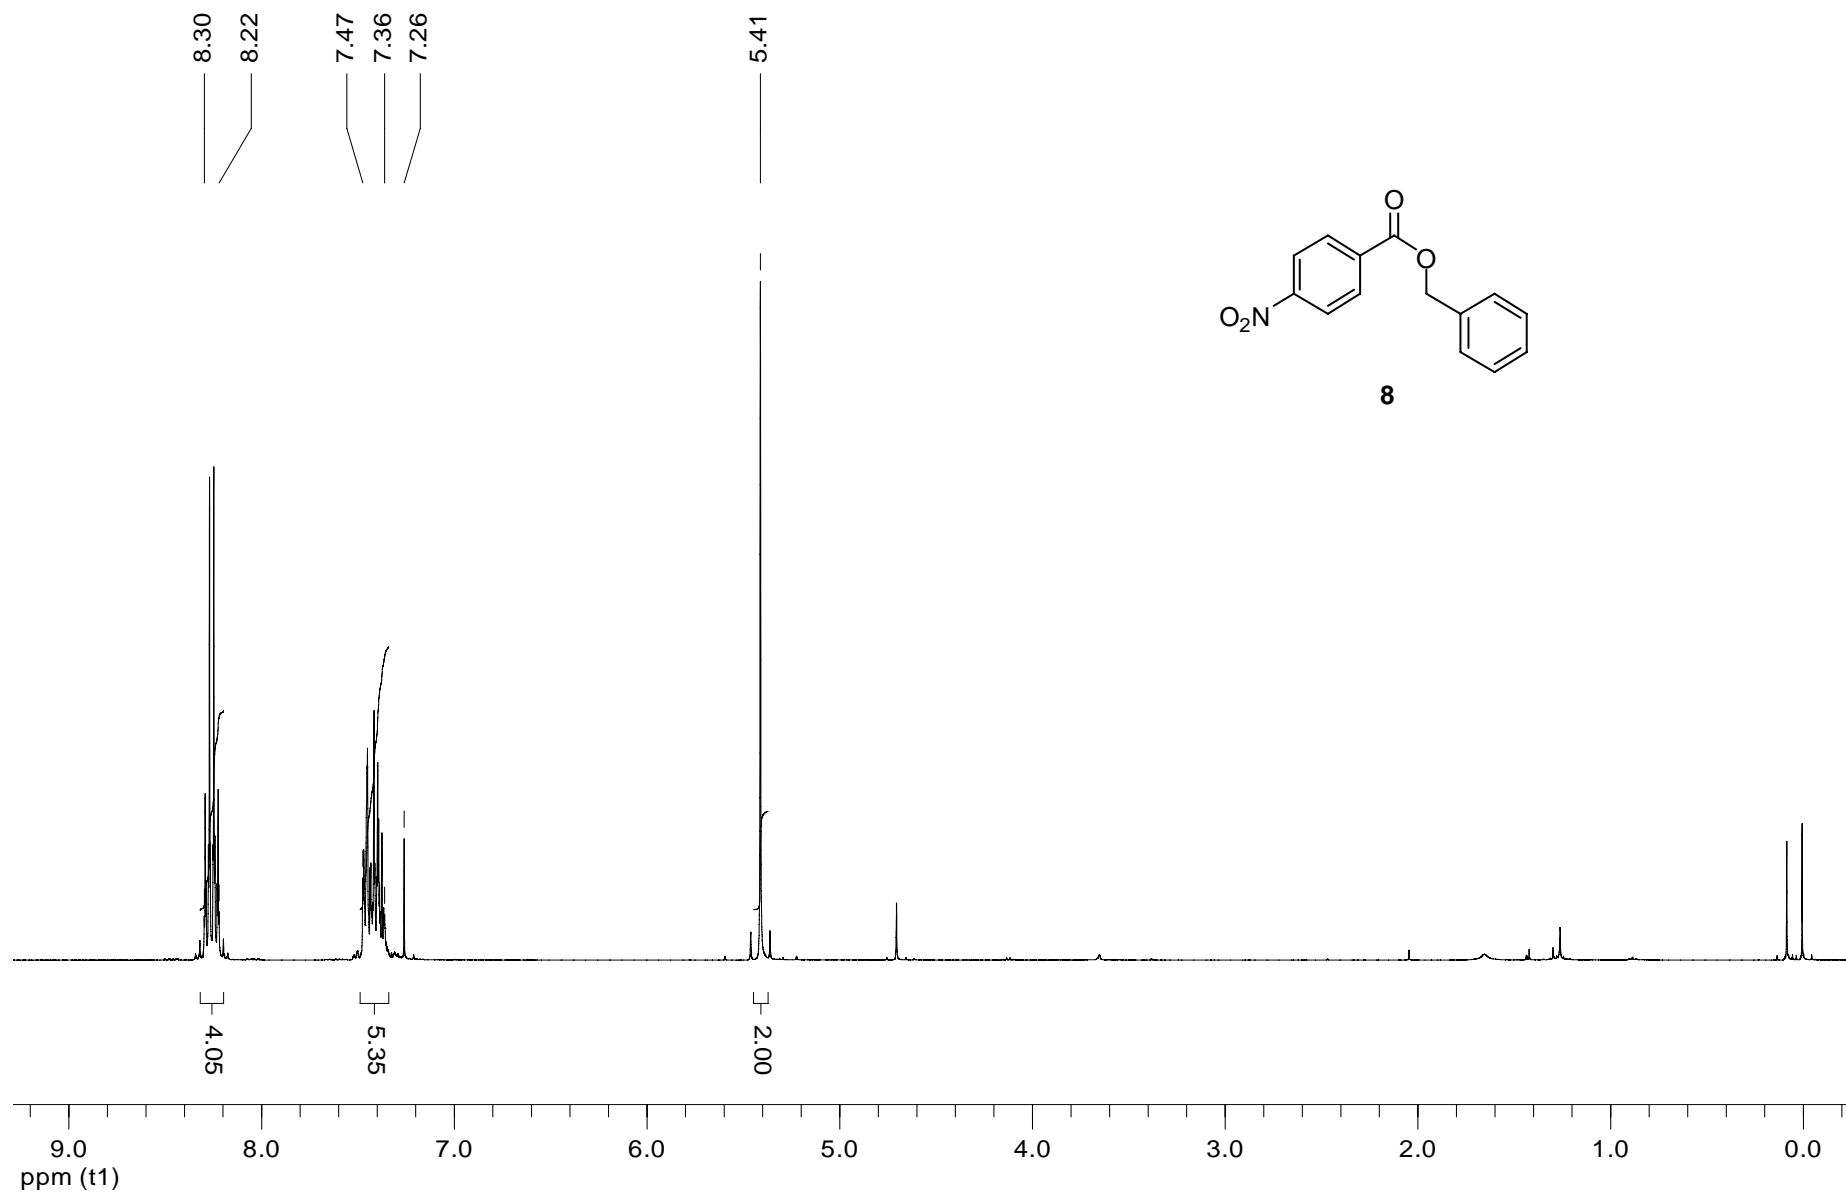

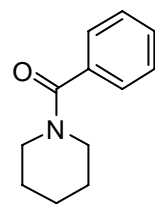

**10a**

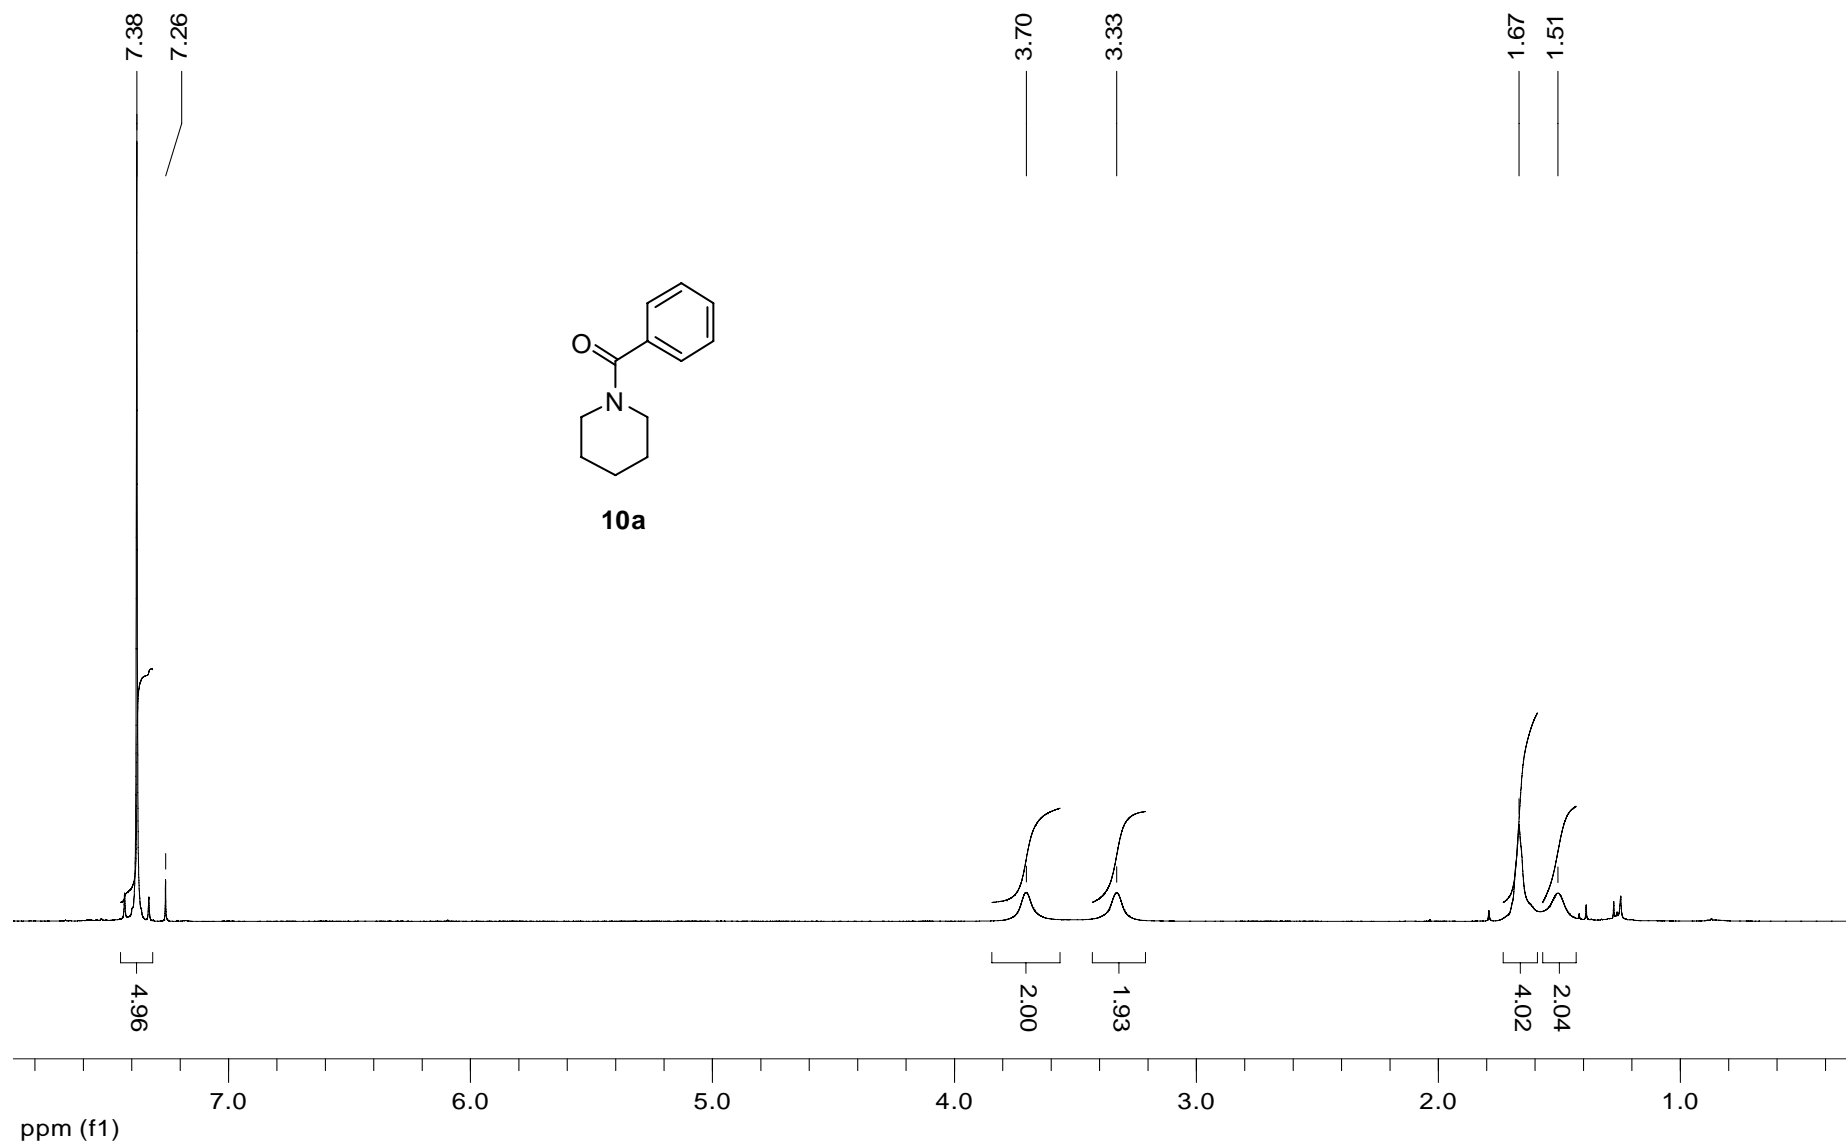

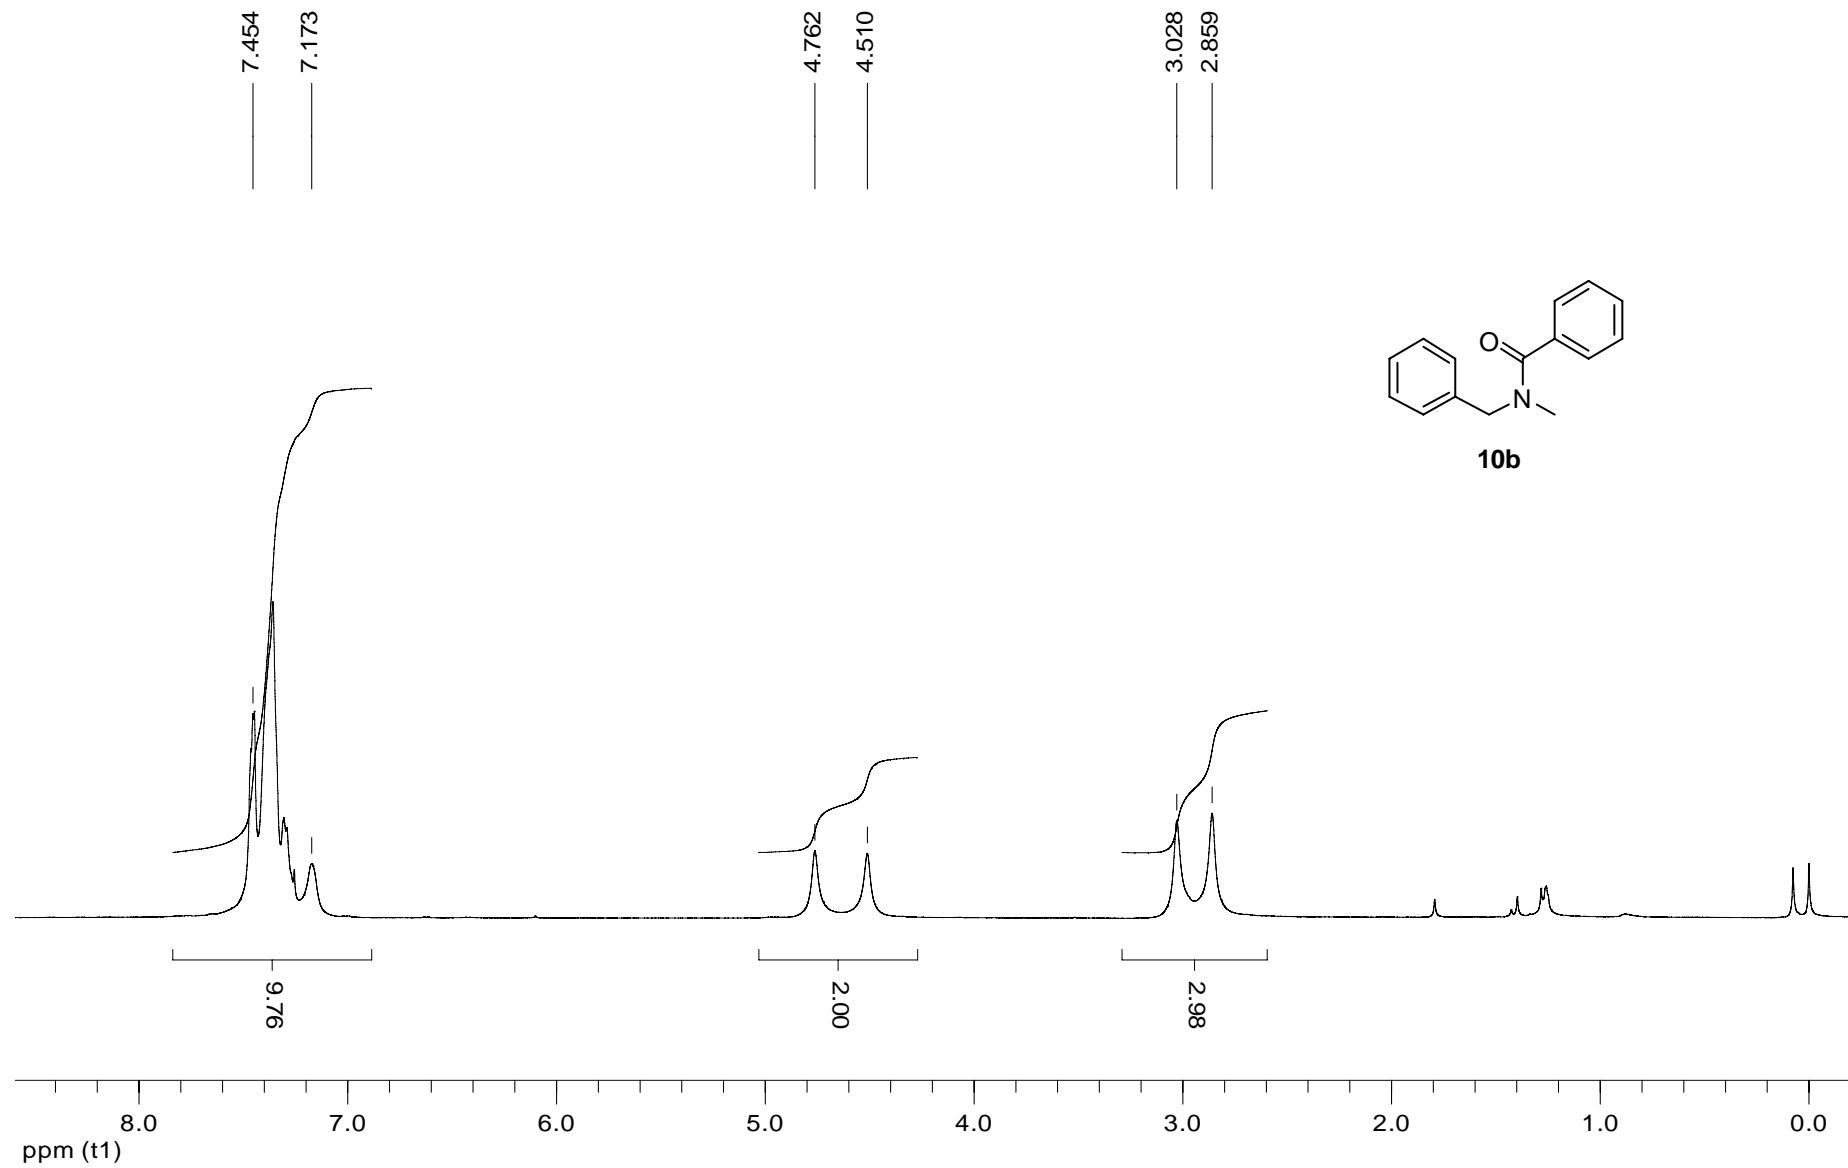



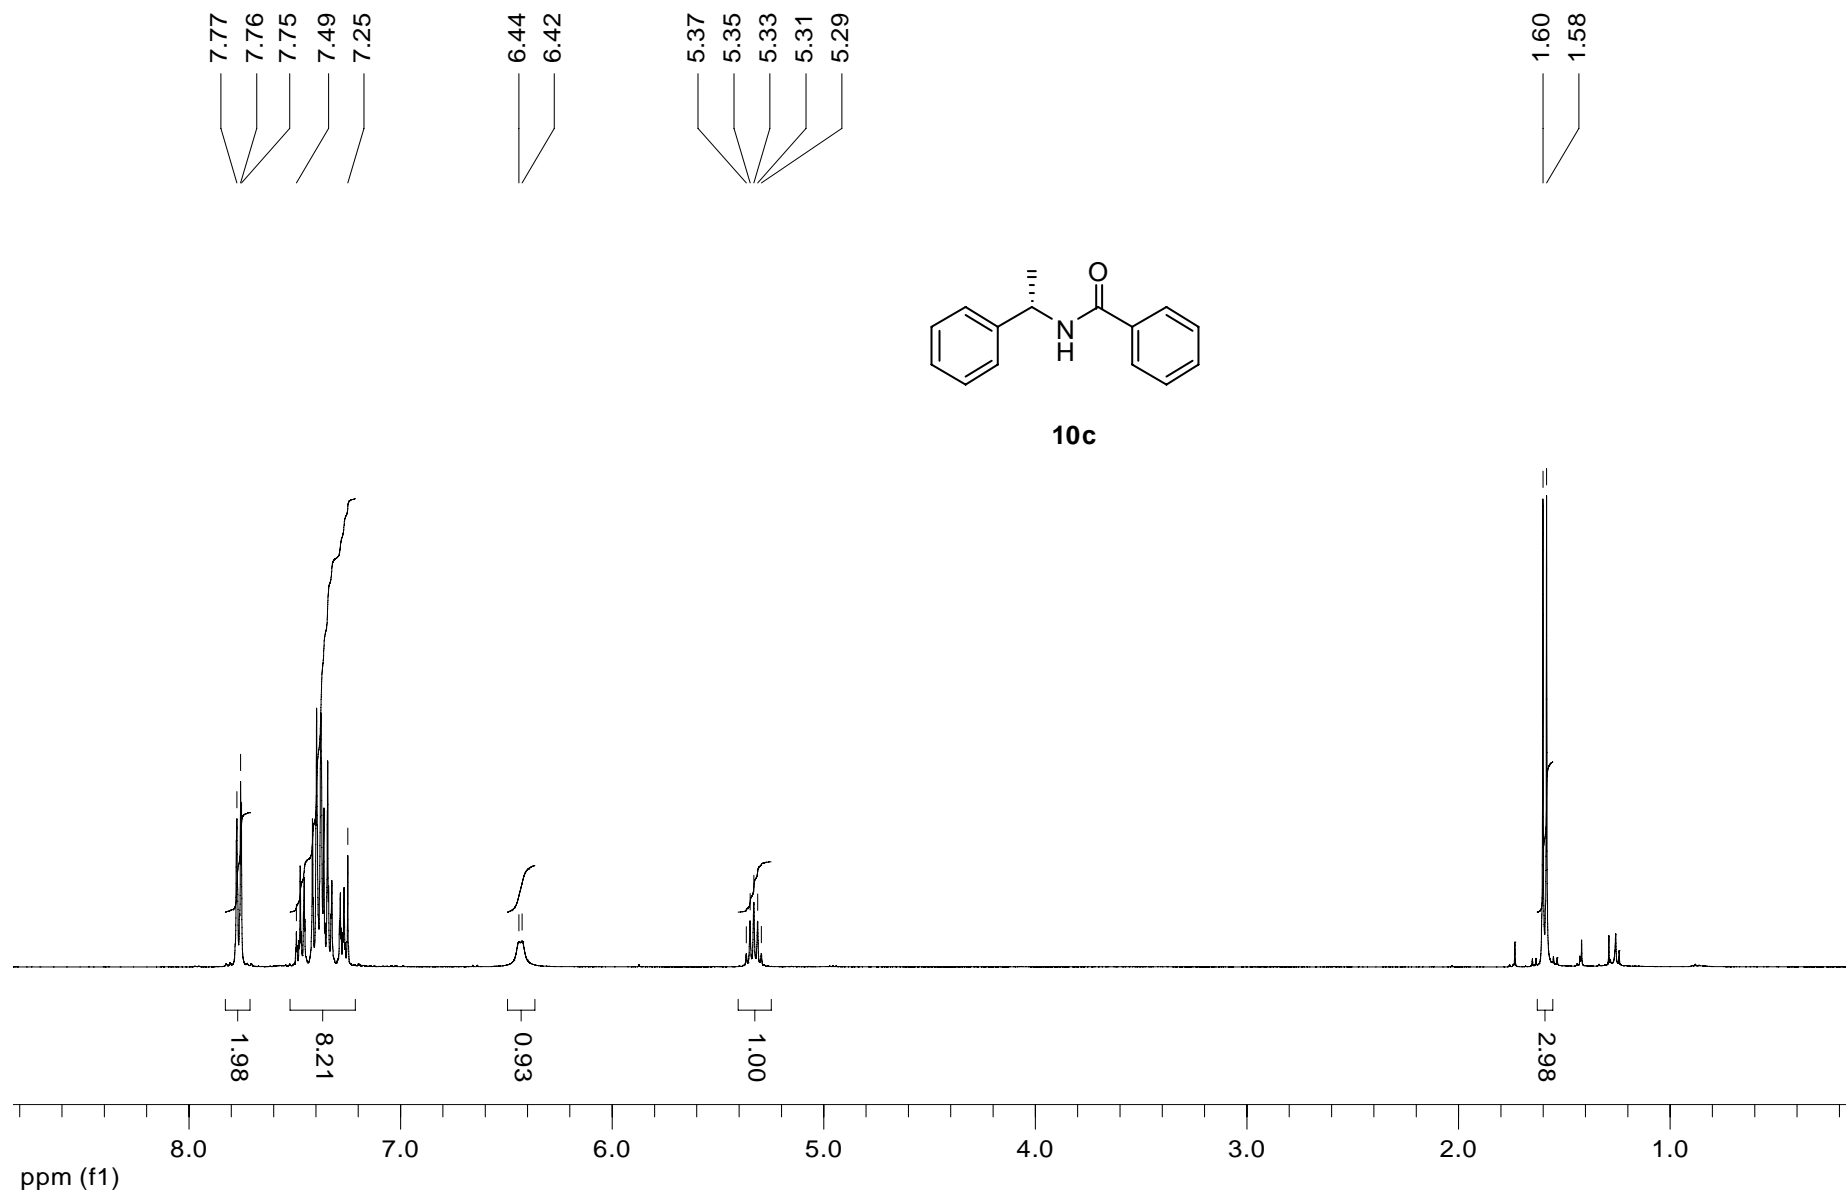

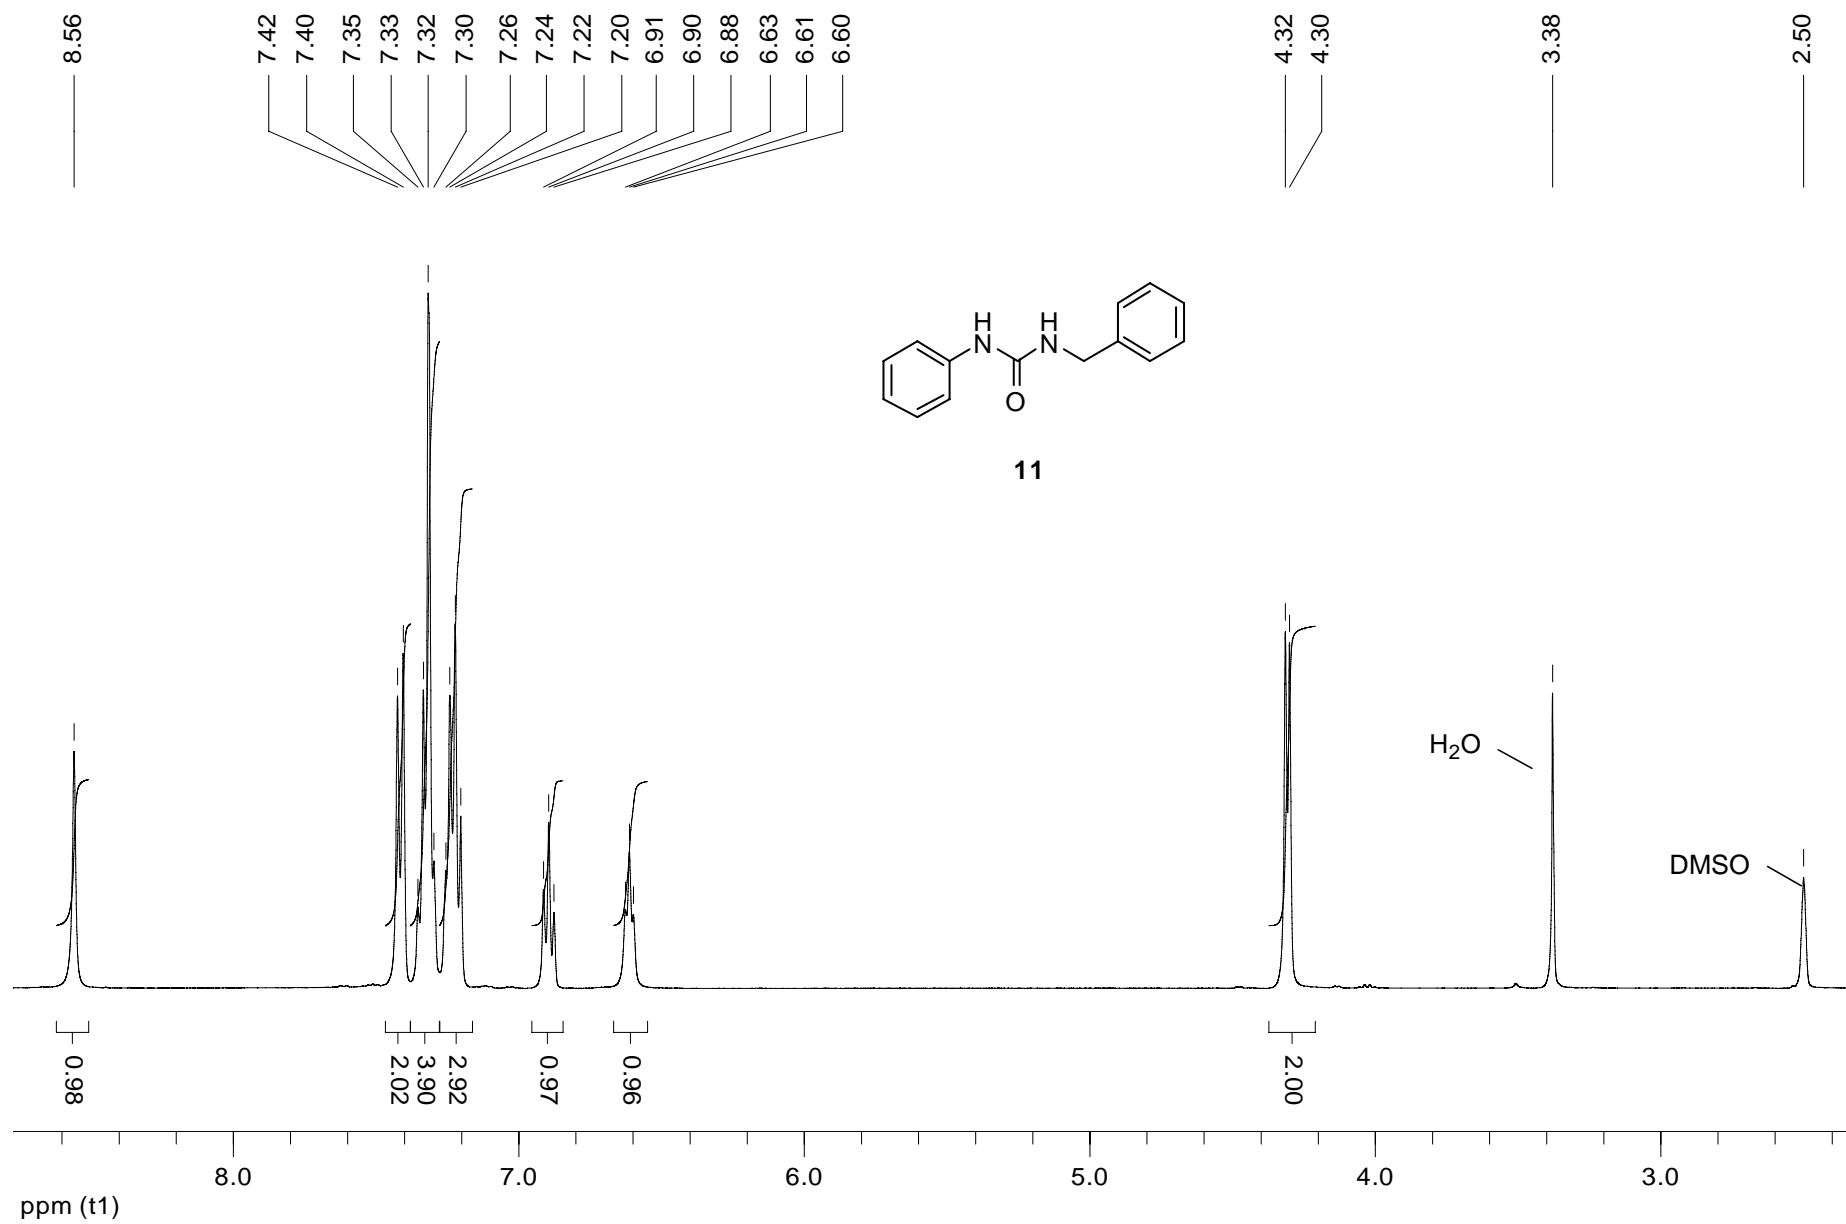

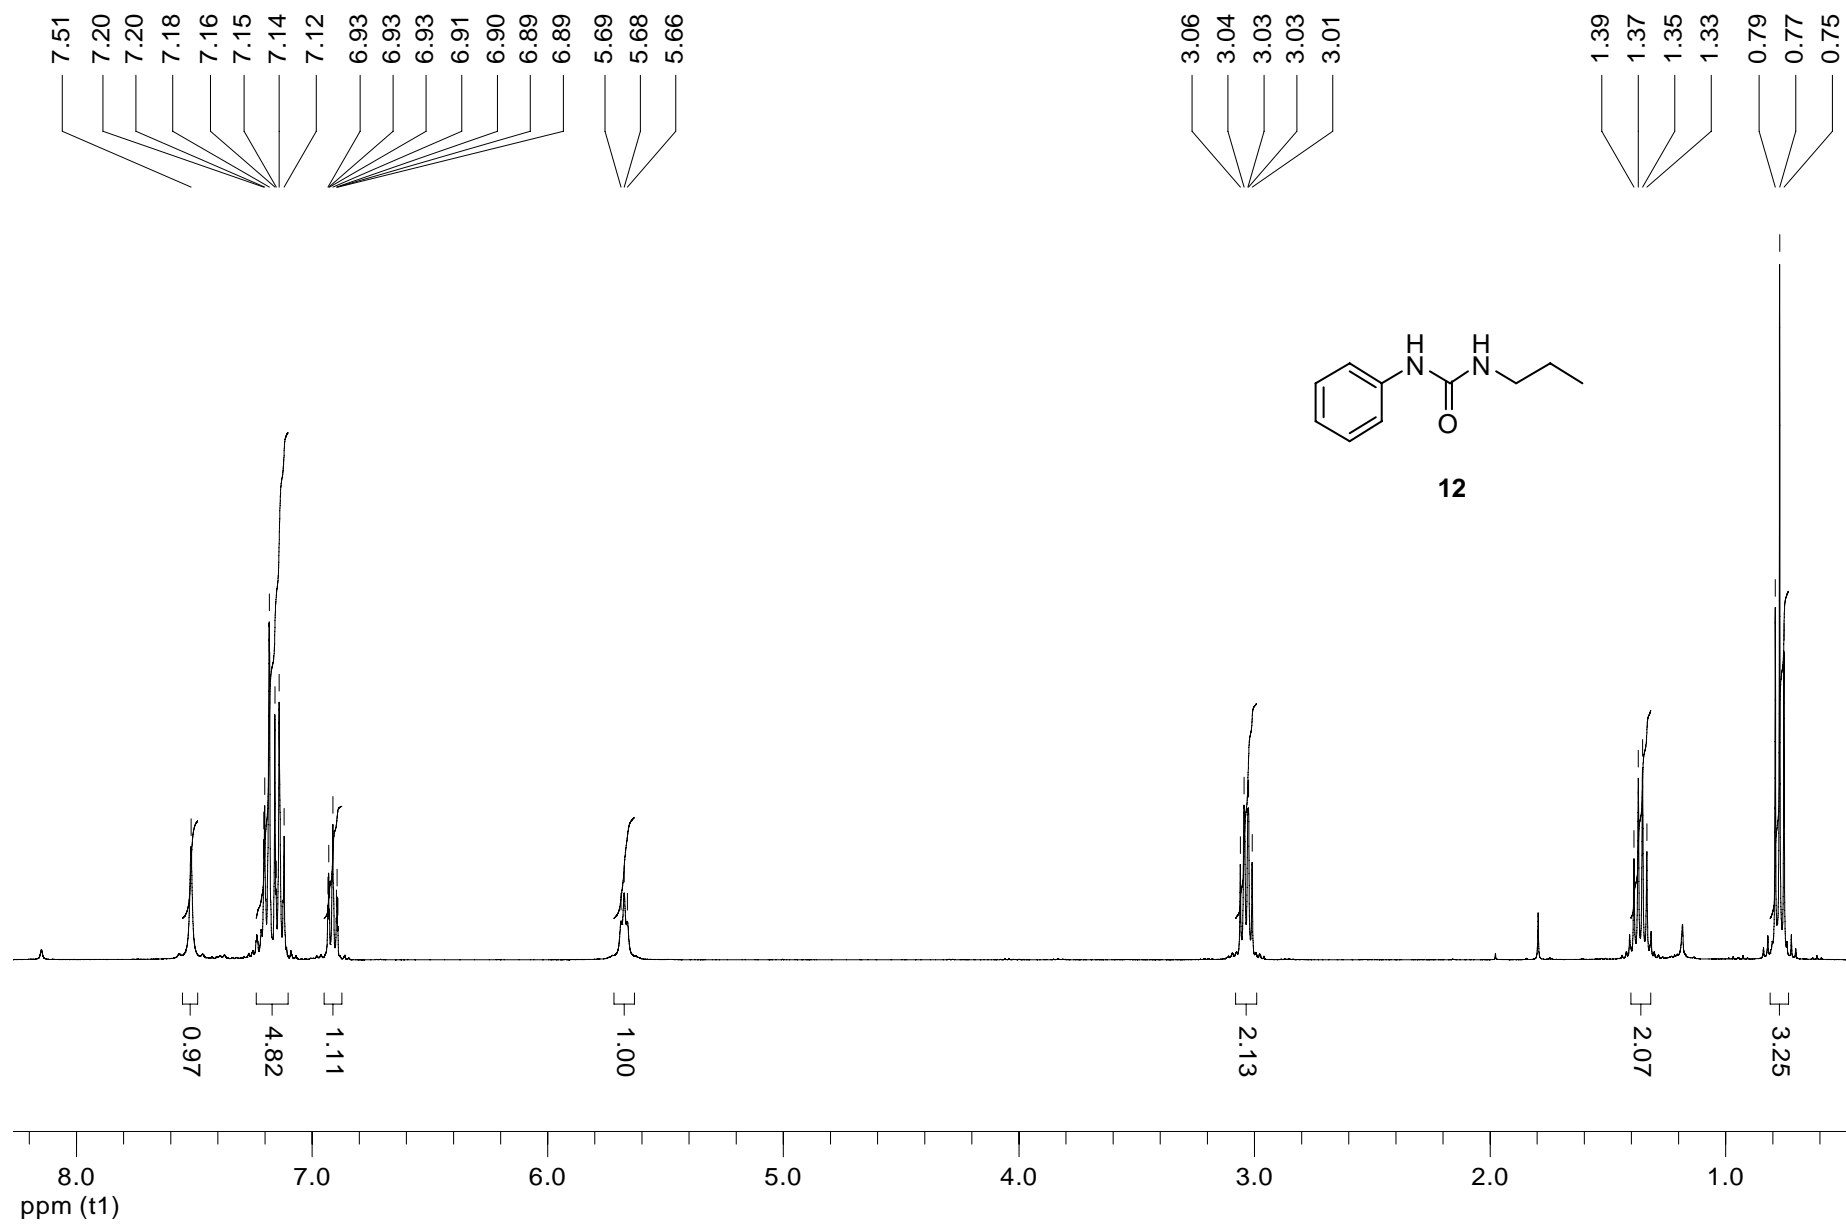

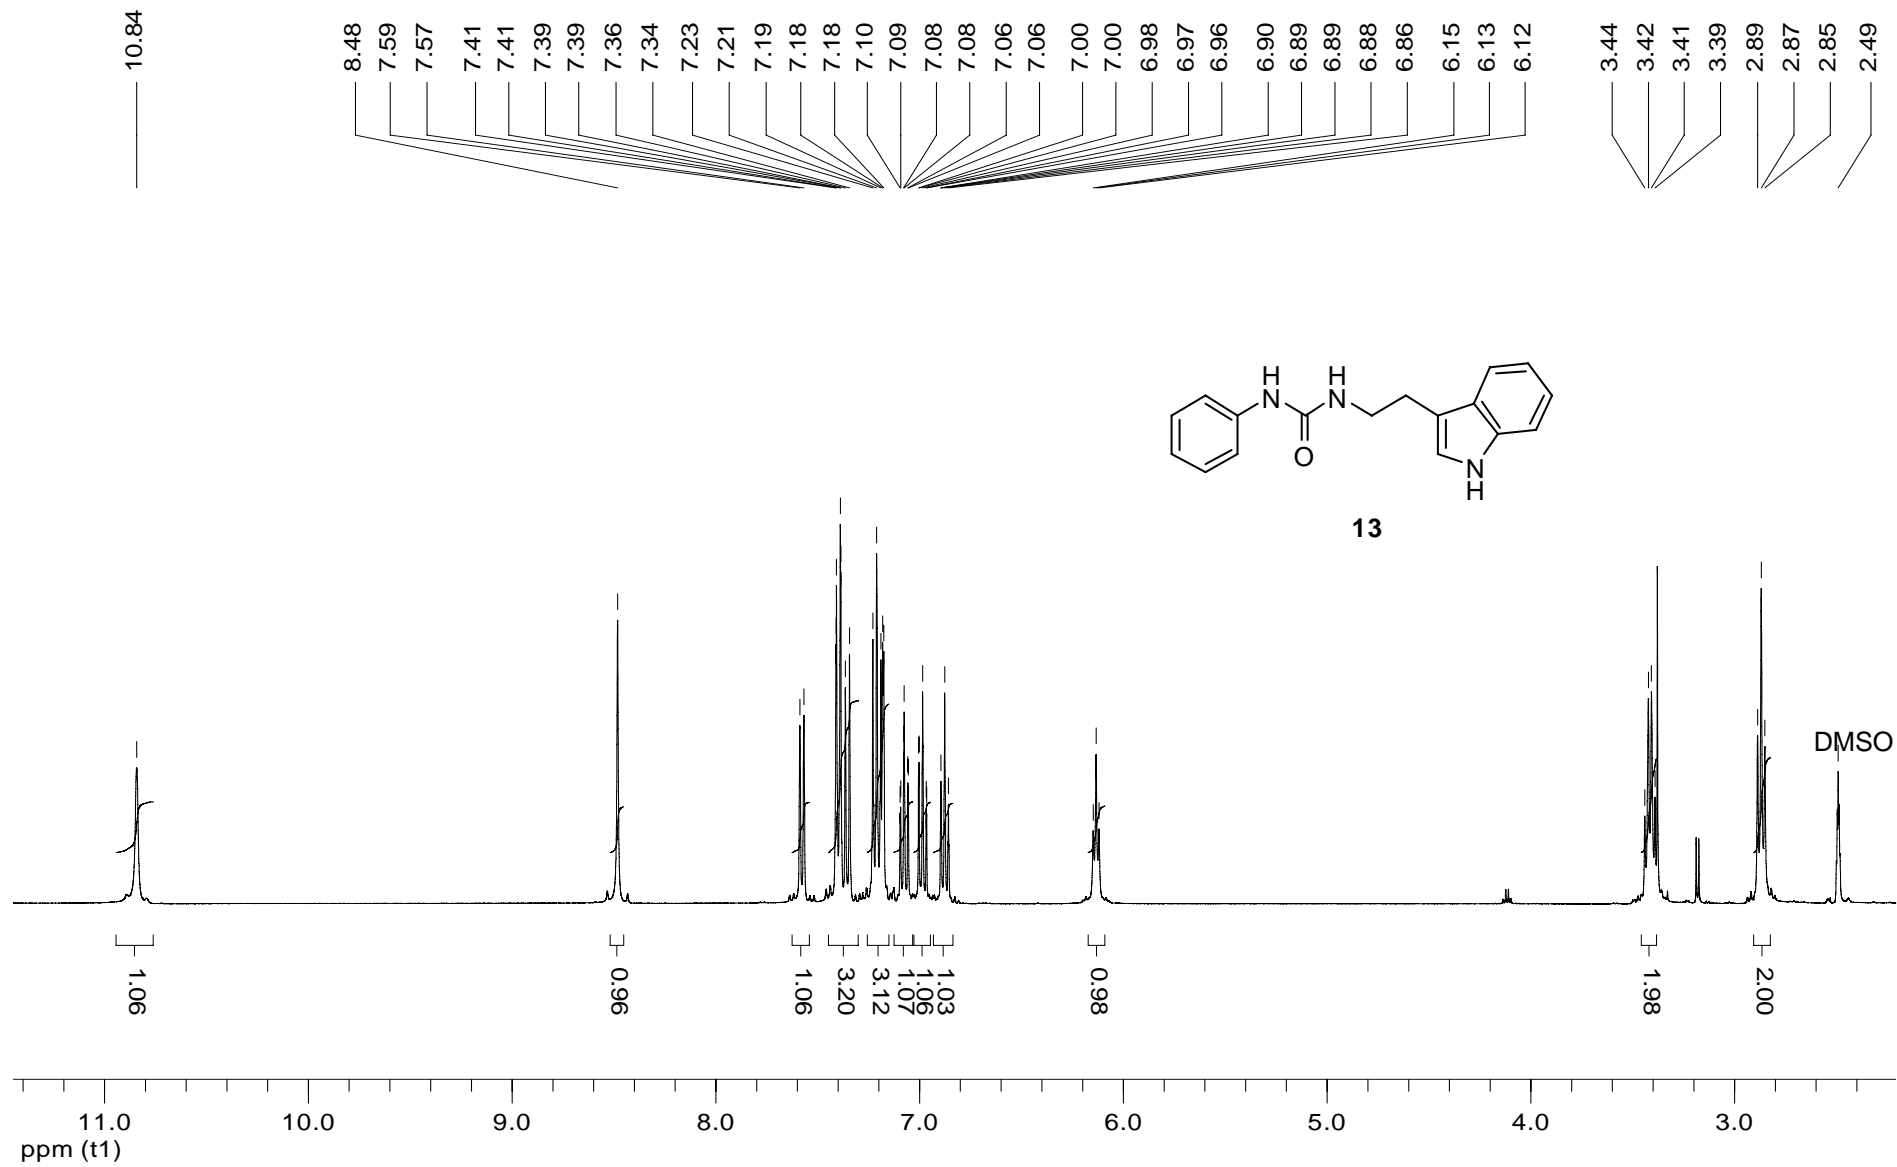

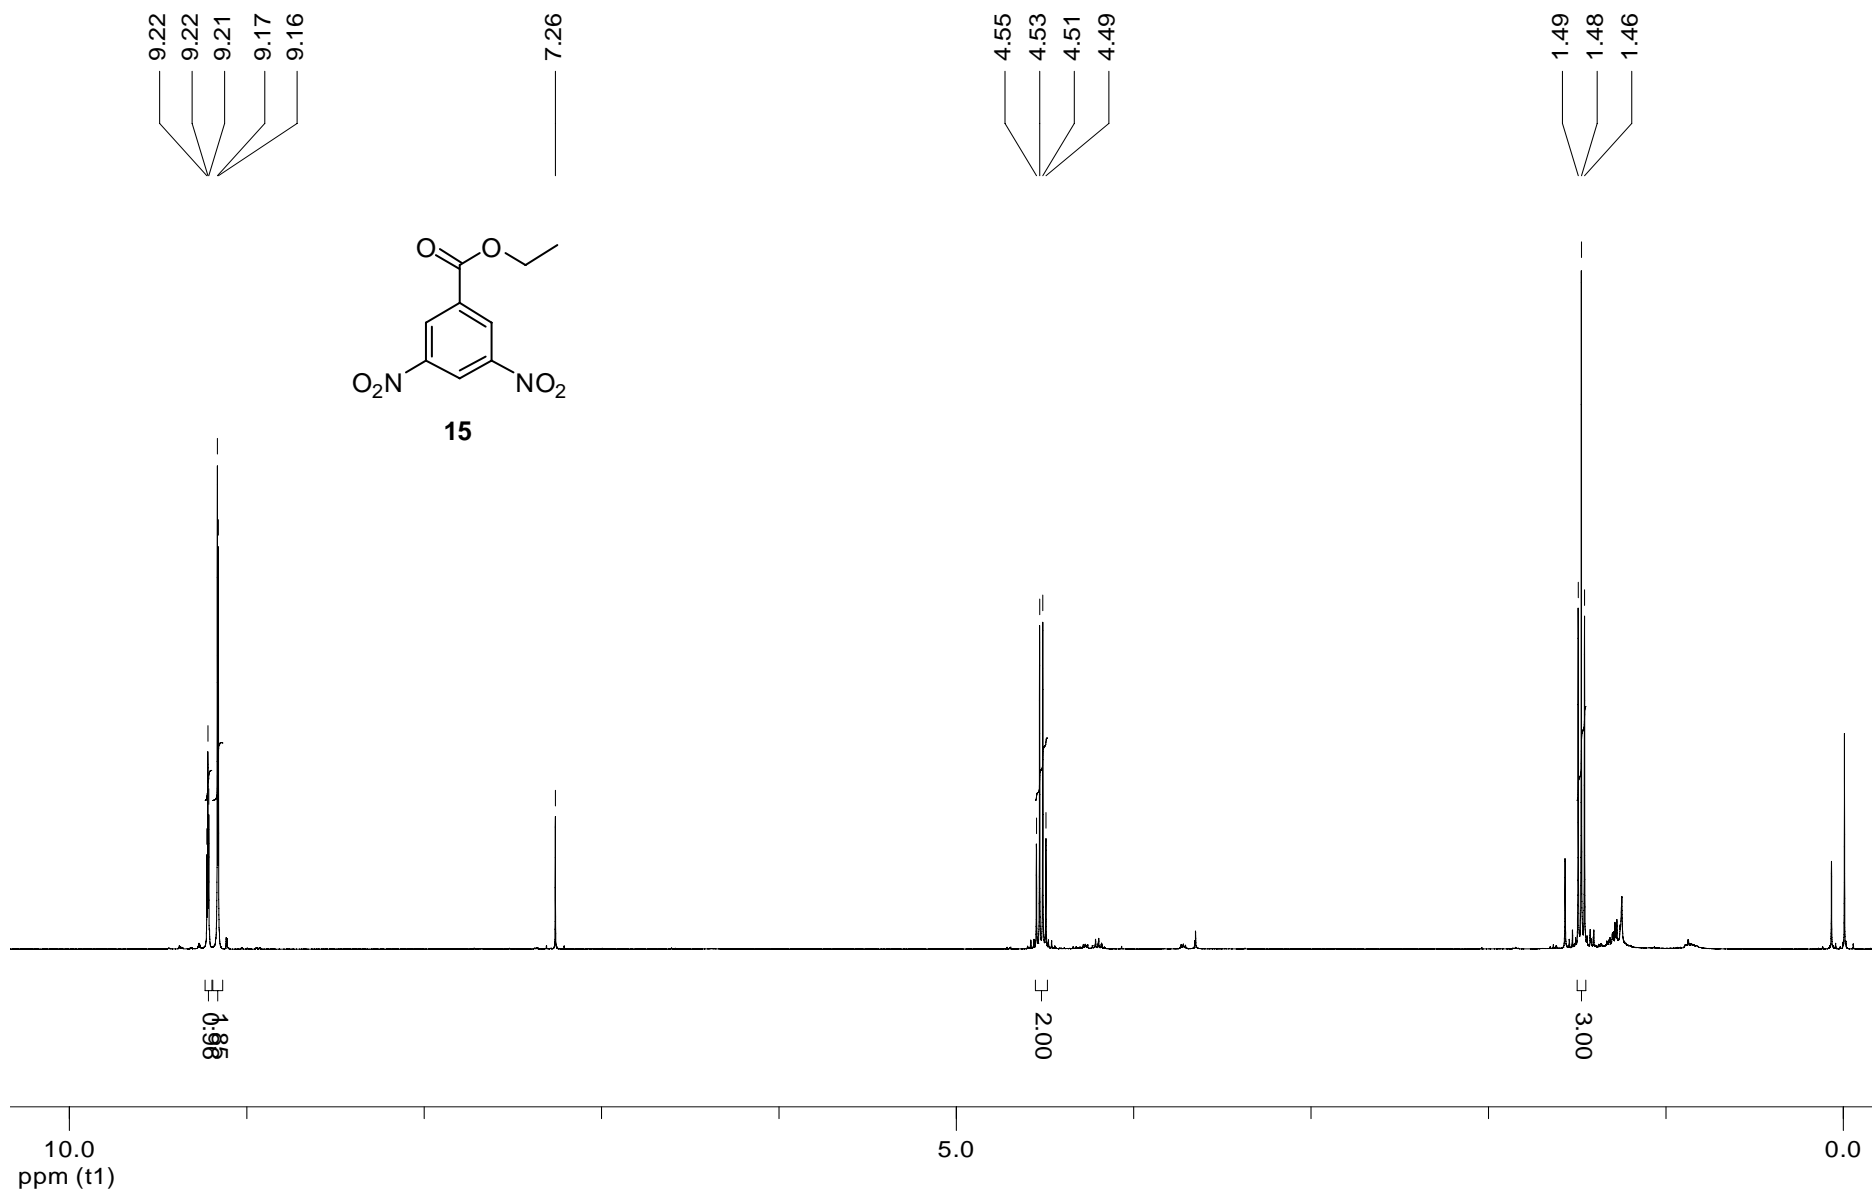

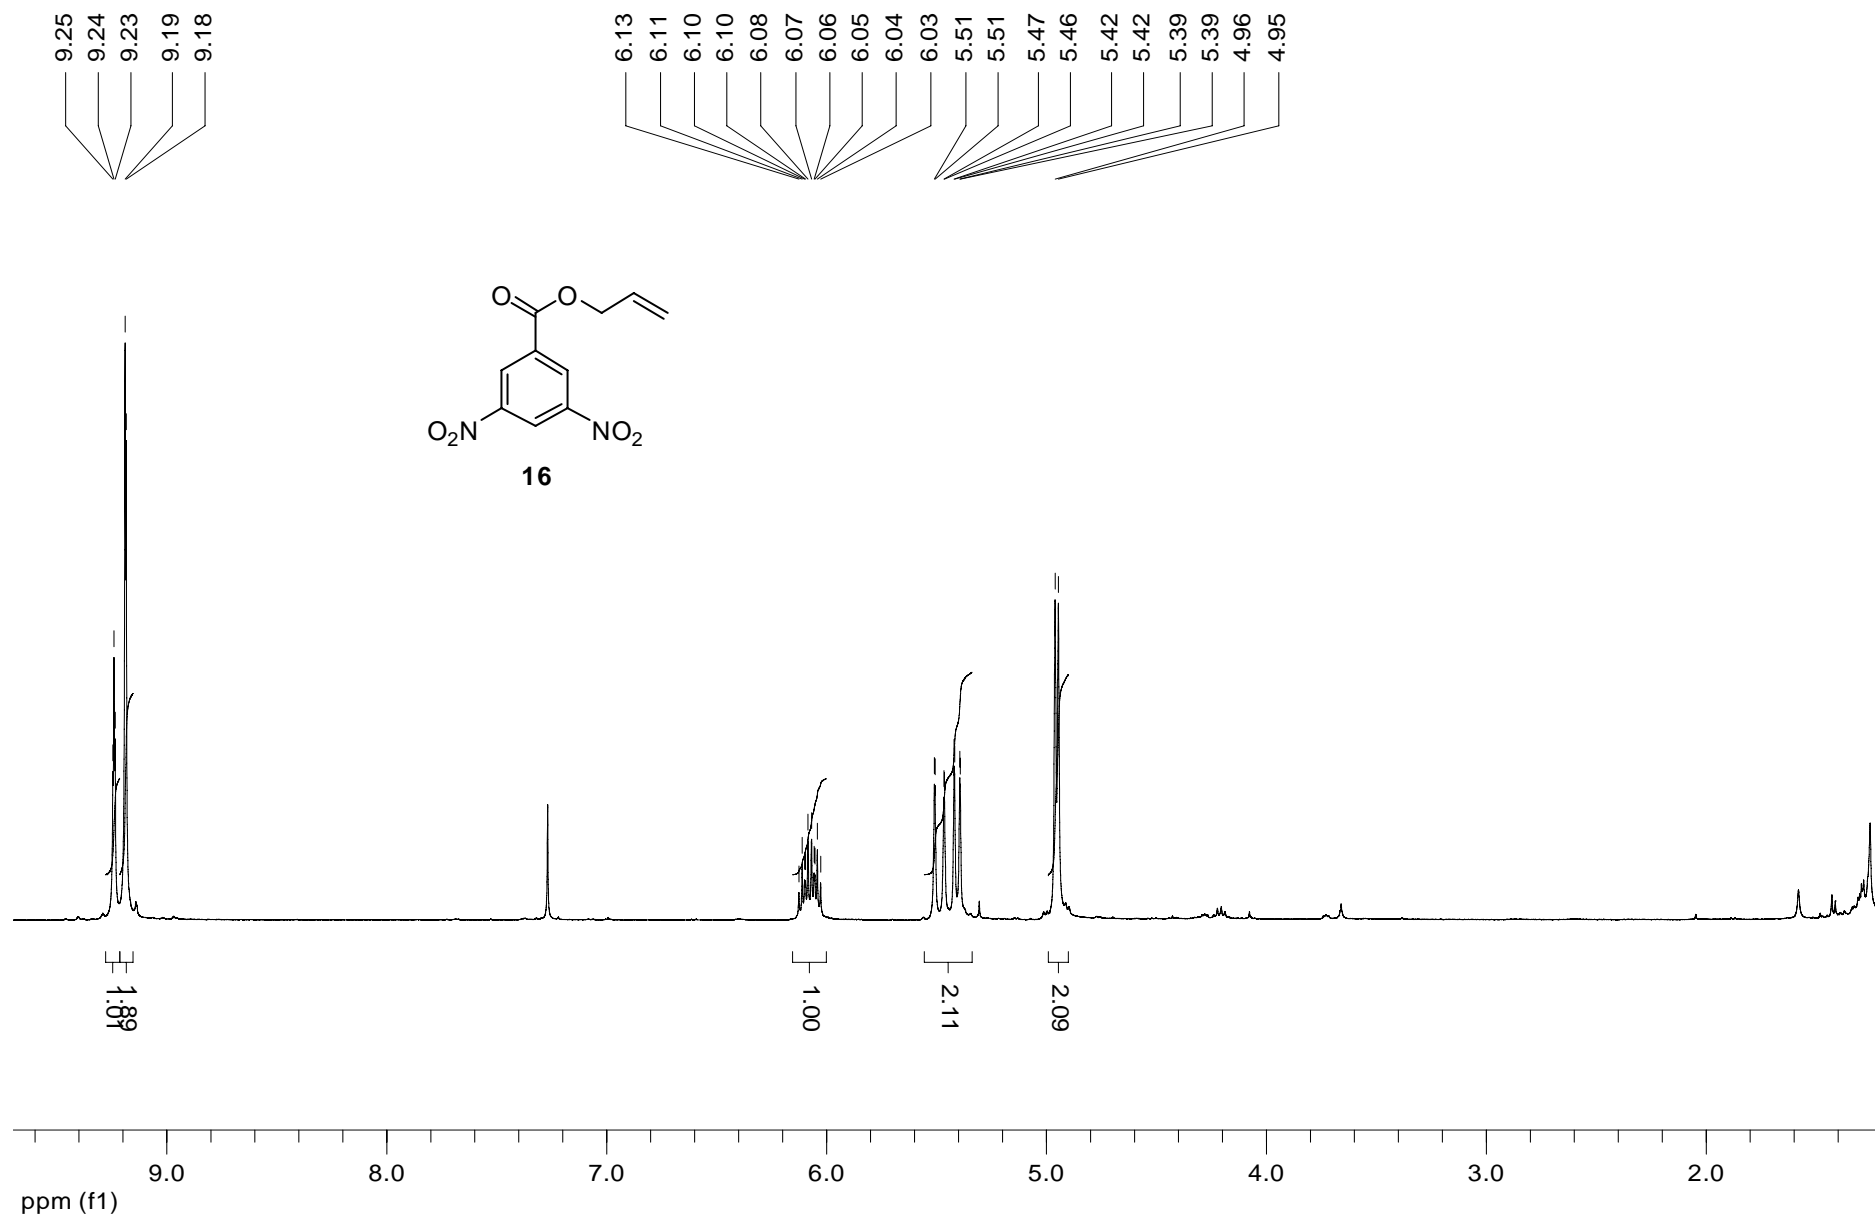

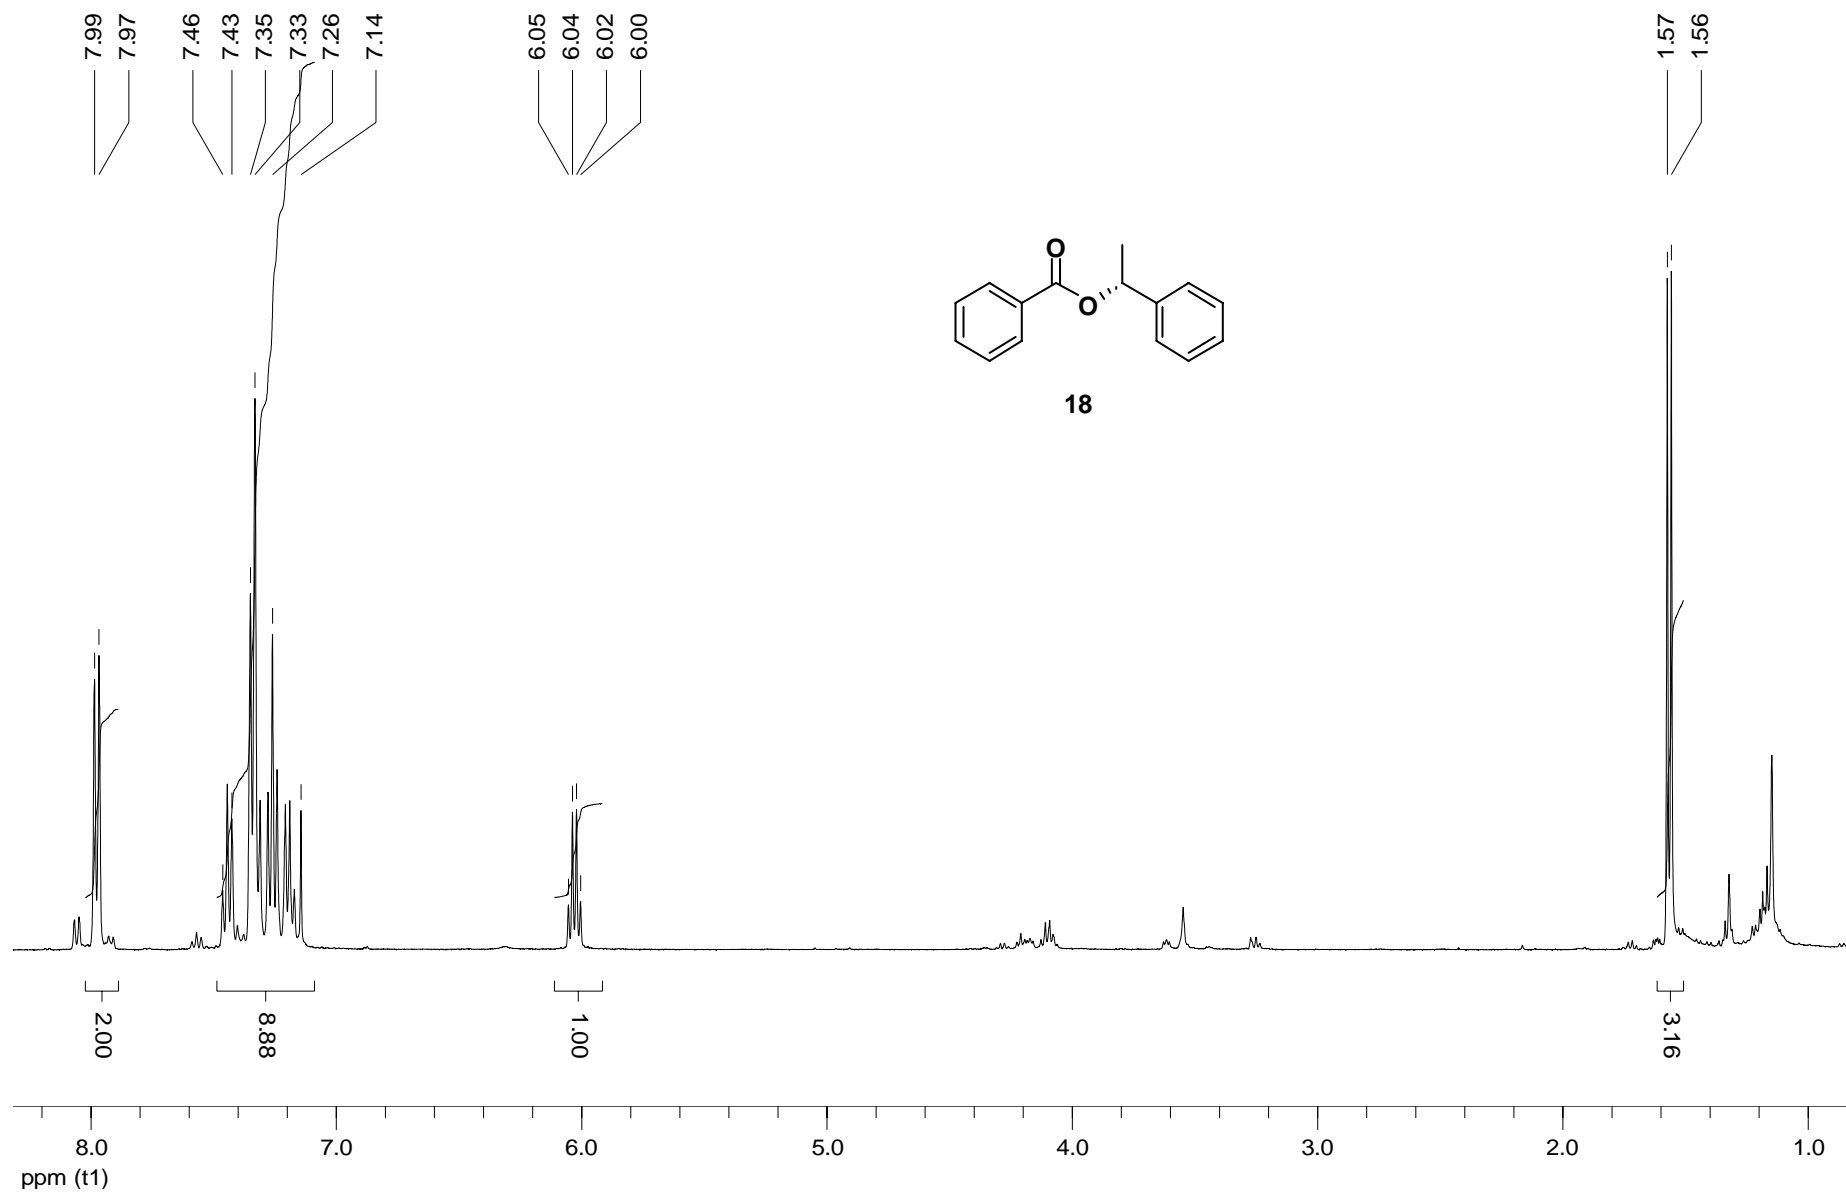

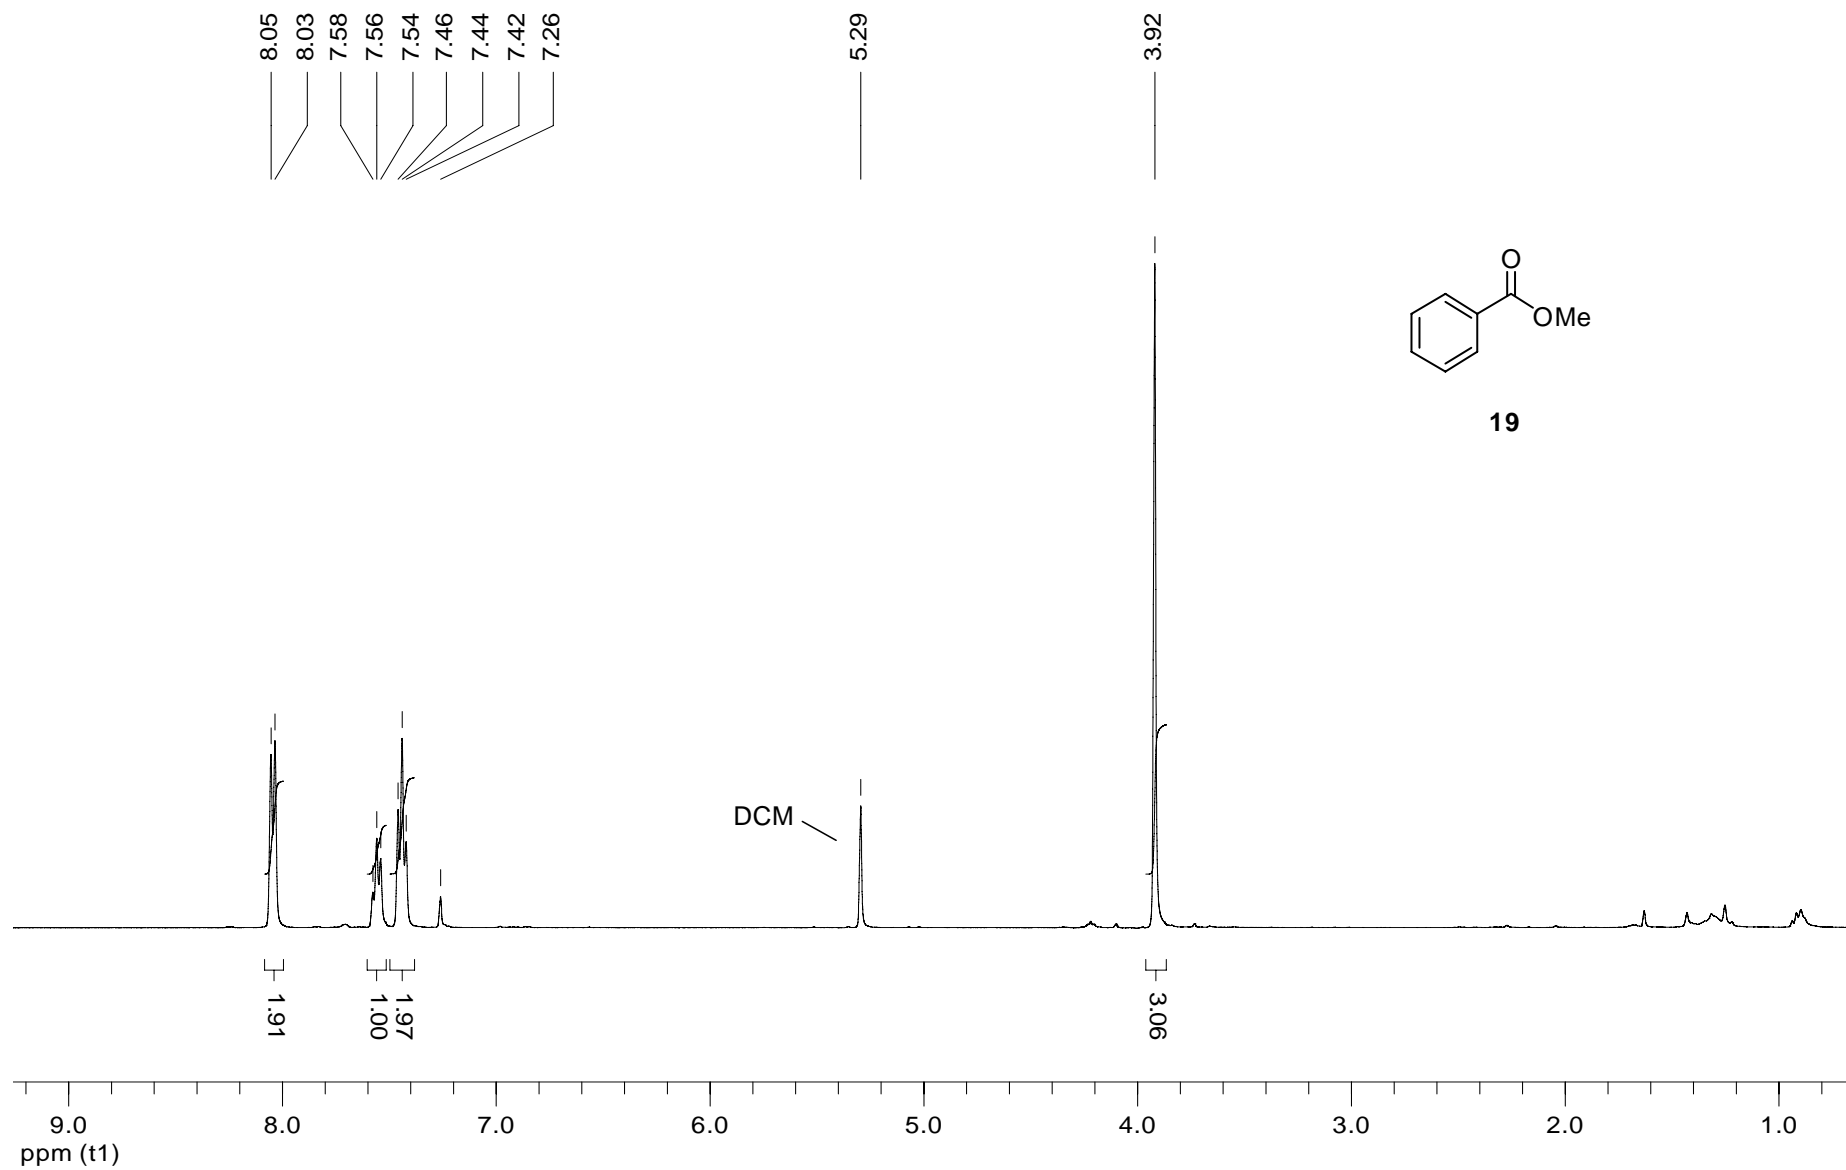



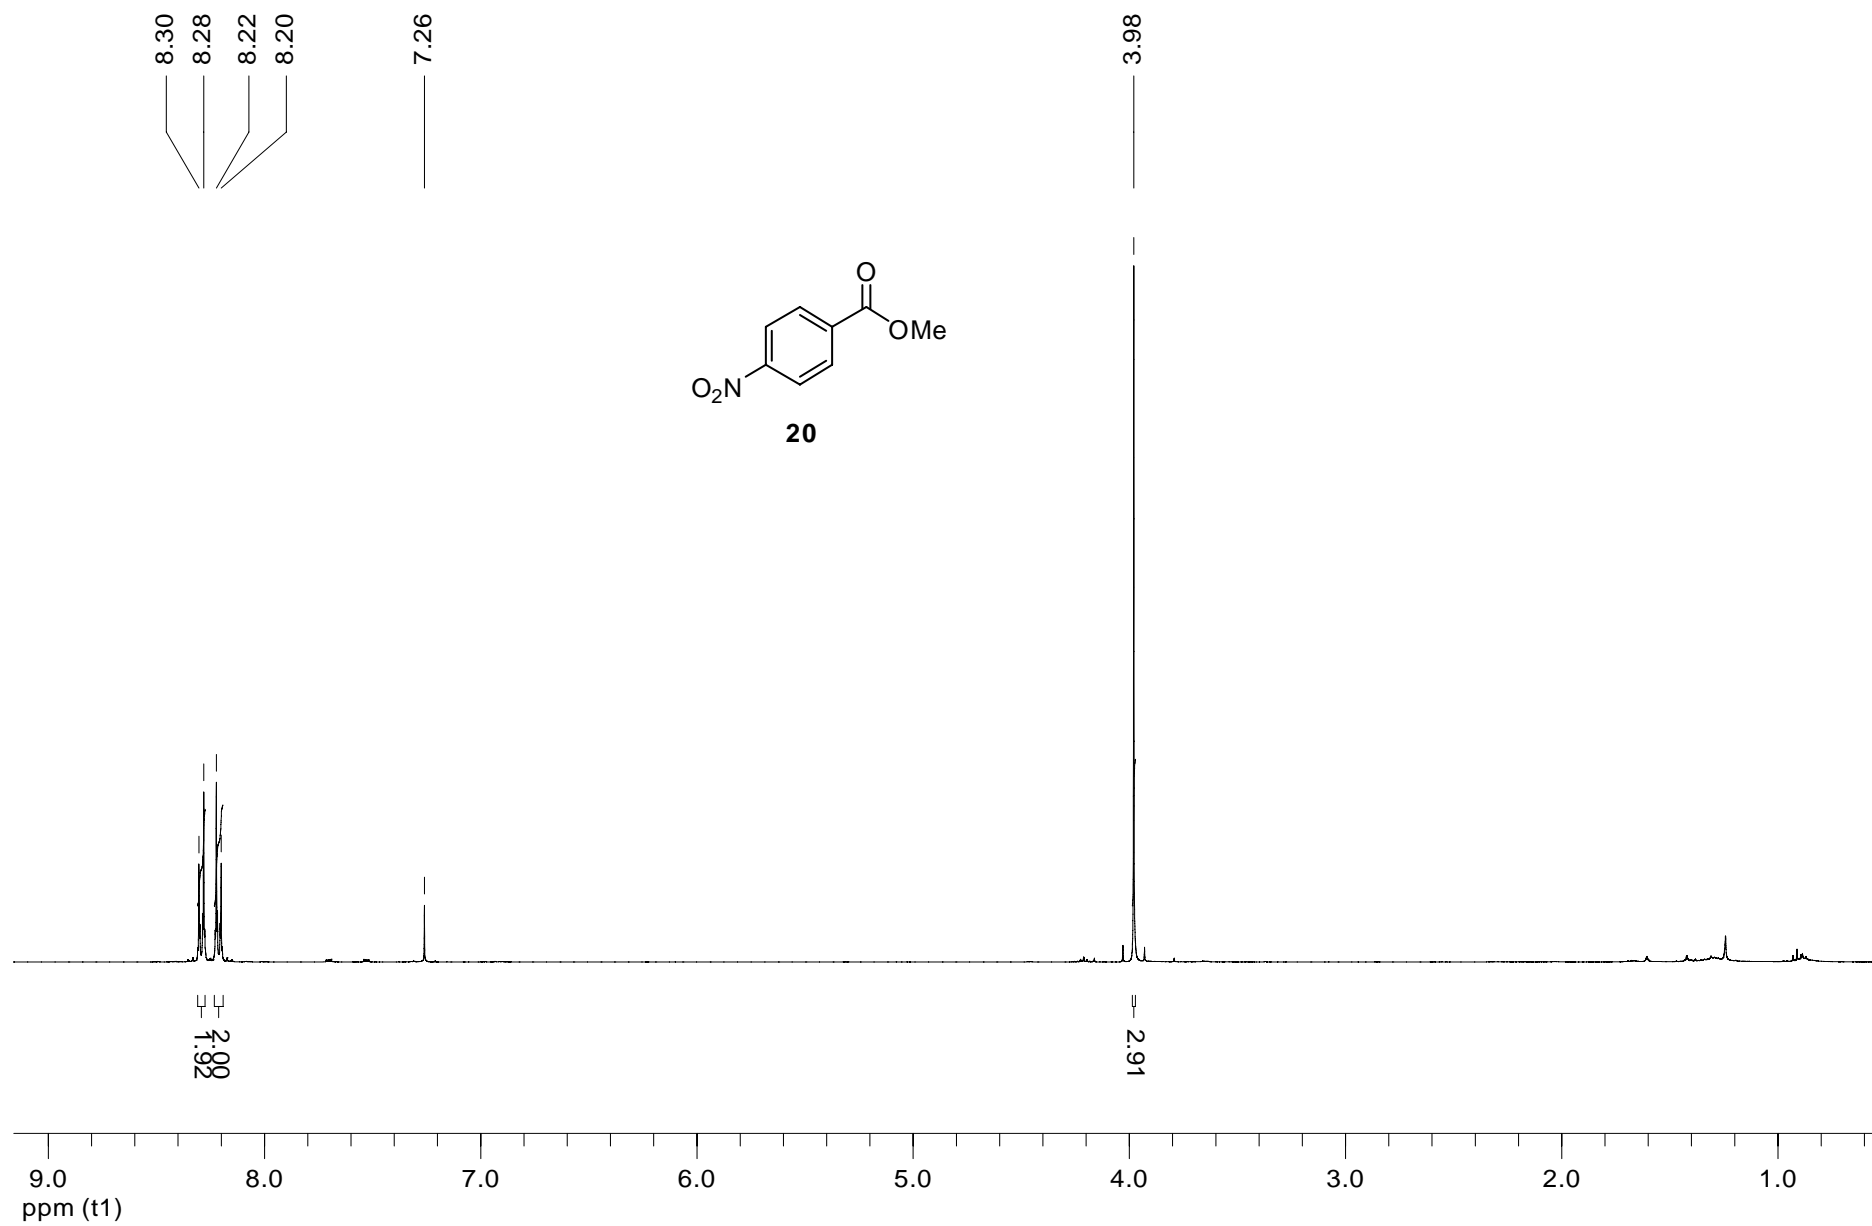

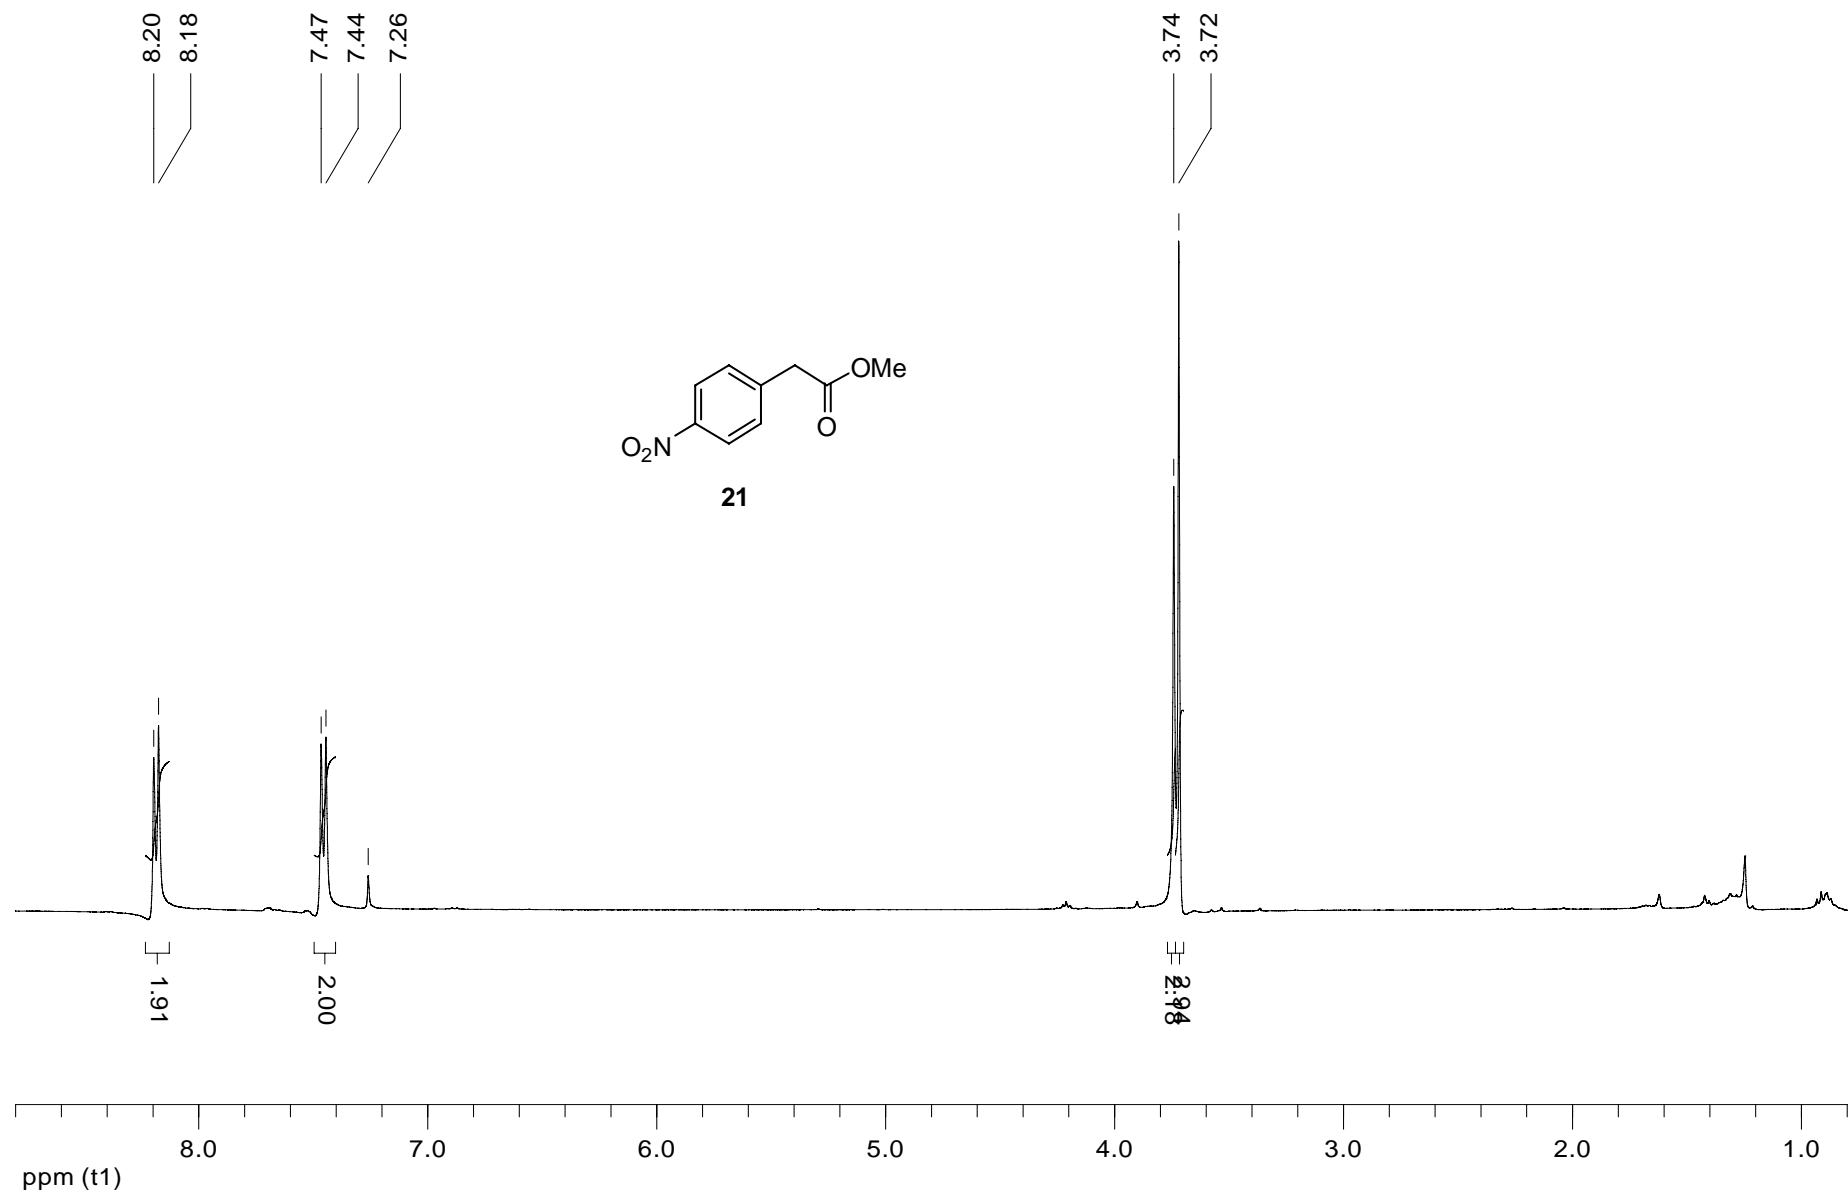

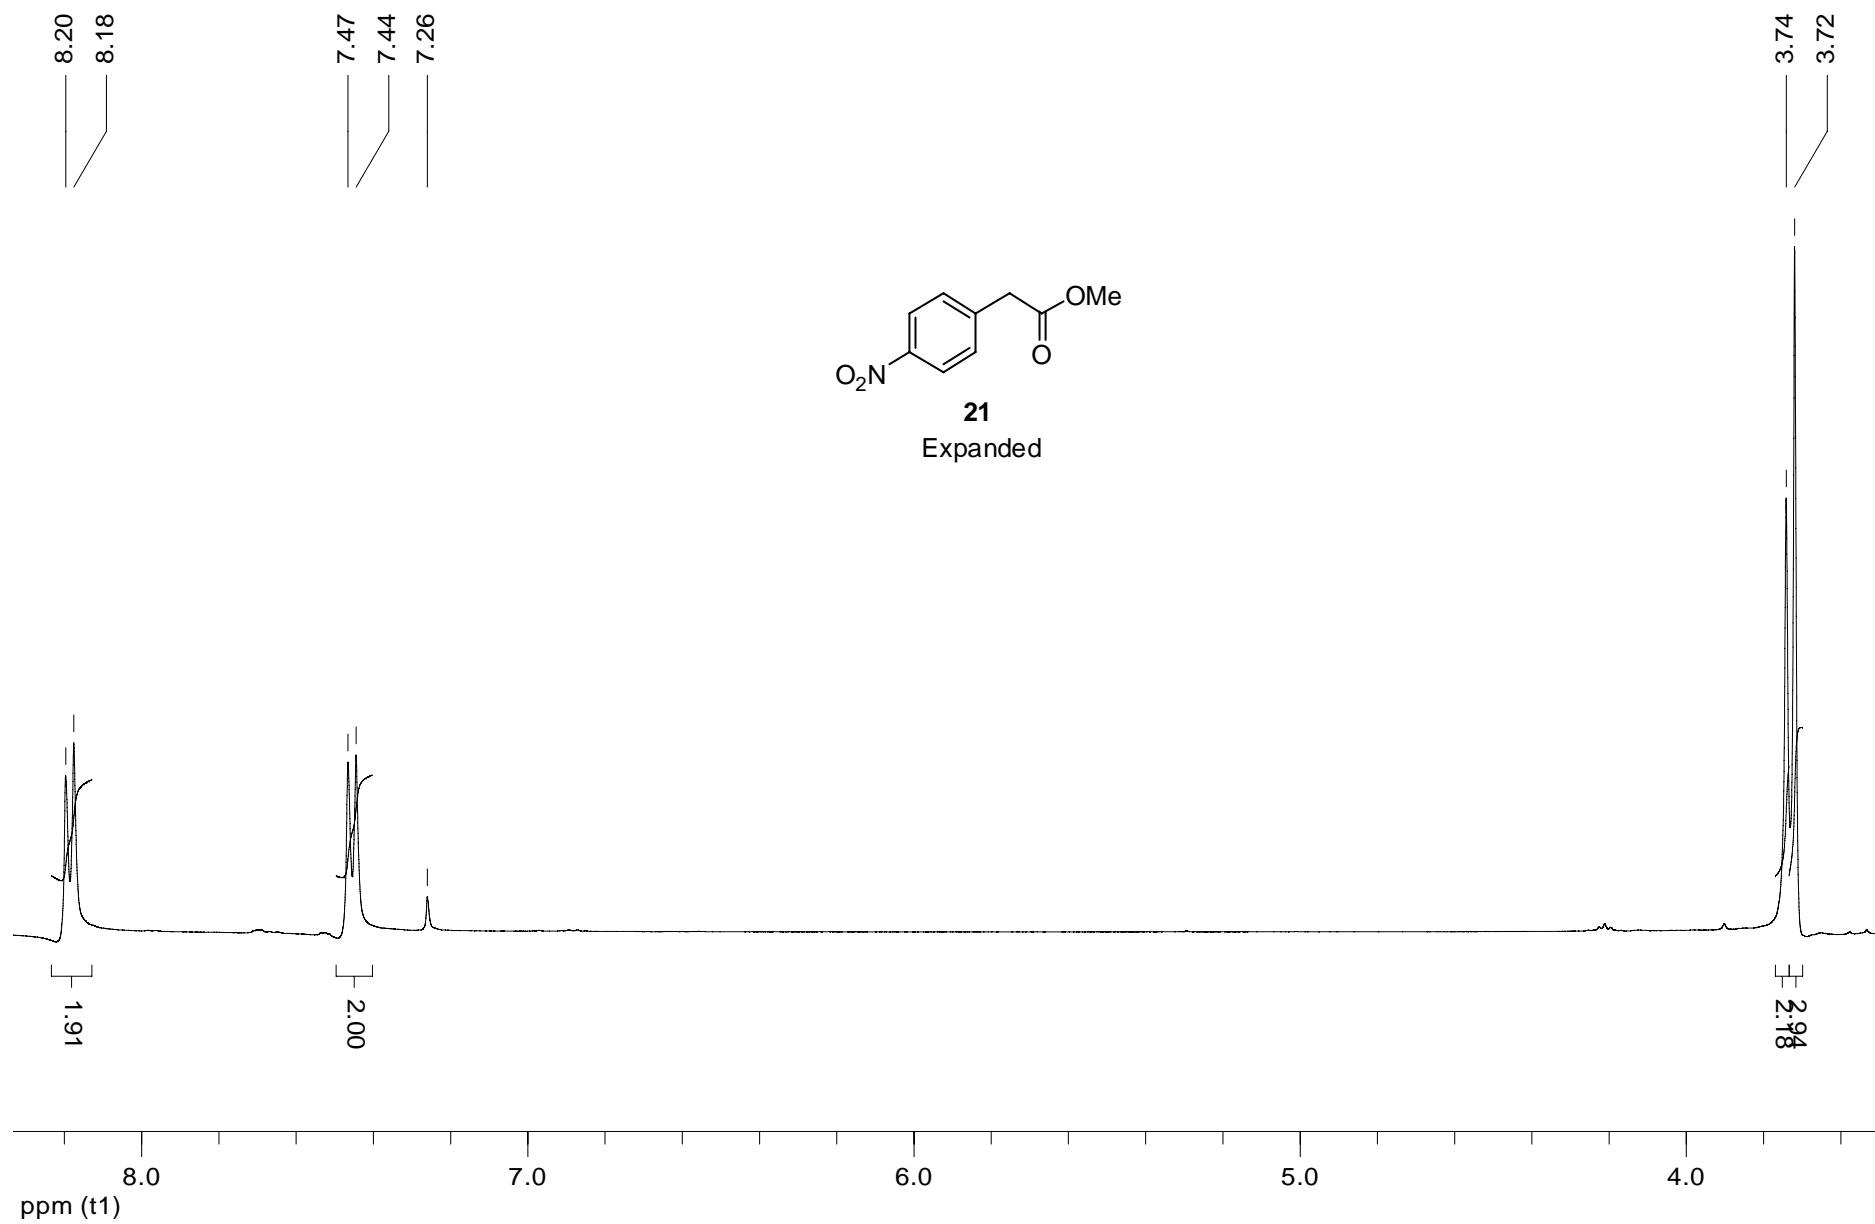

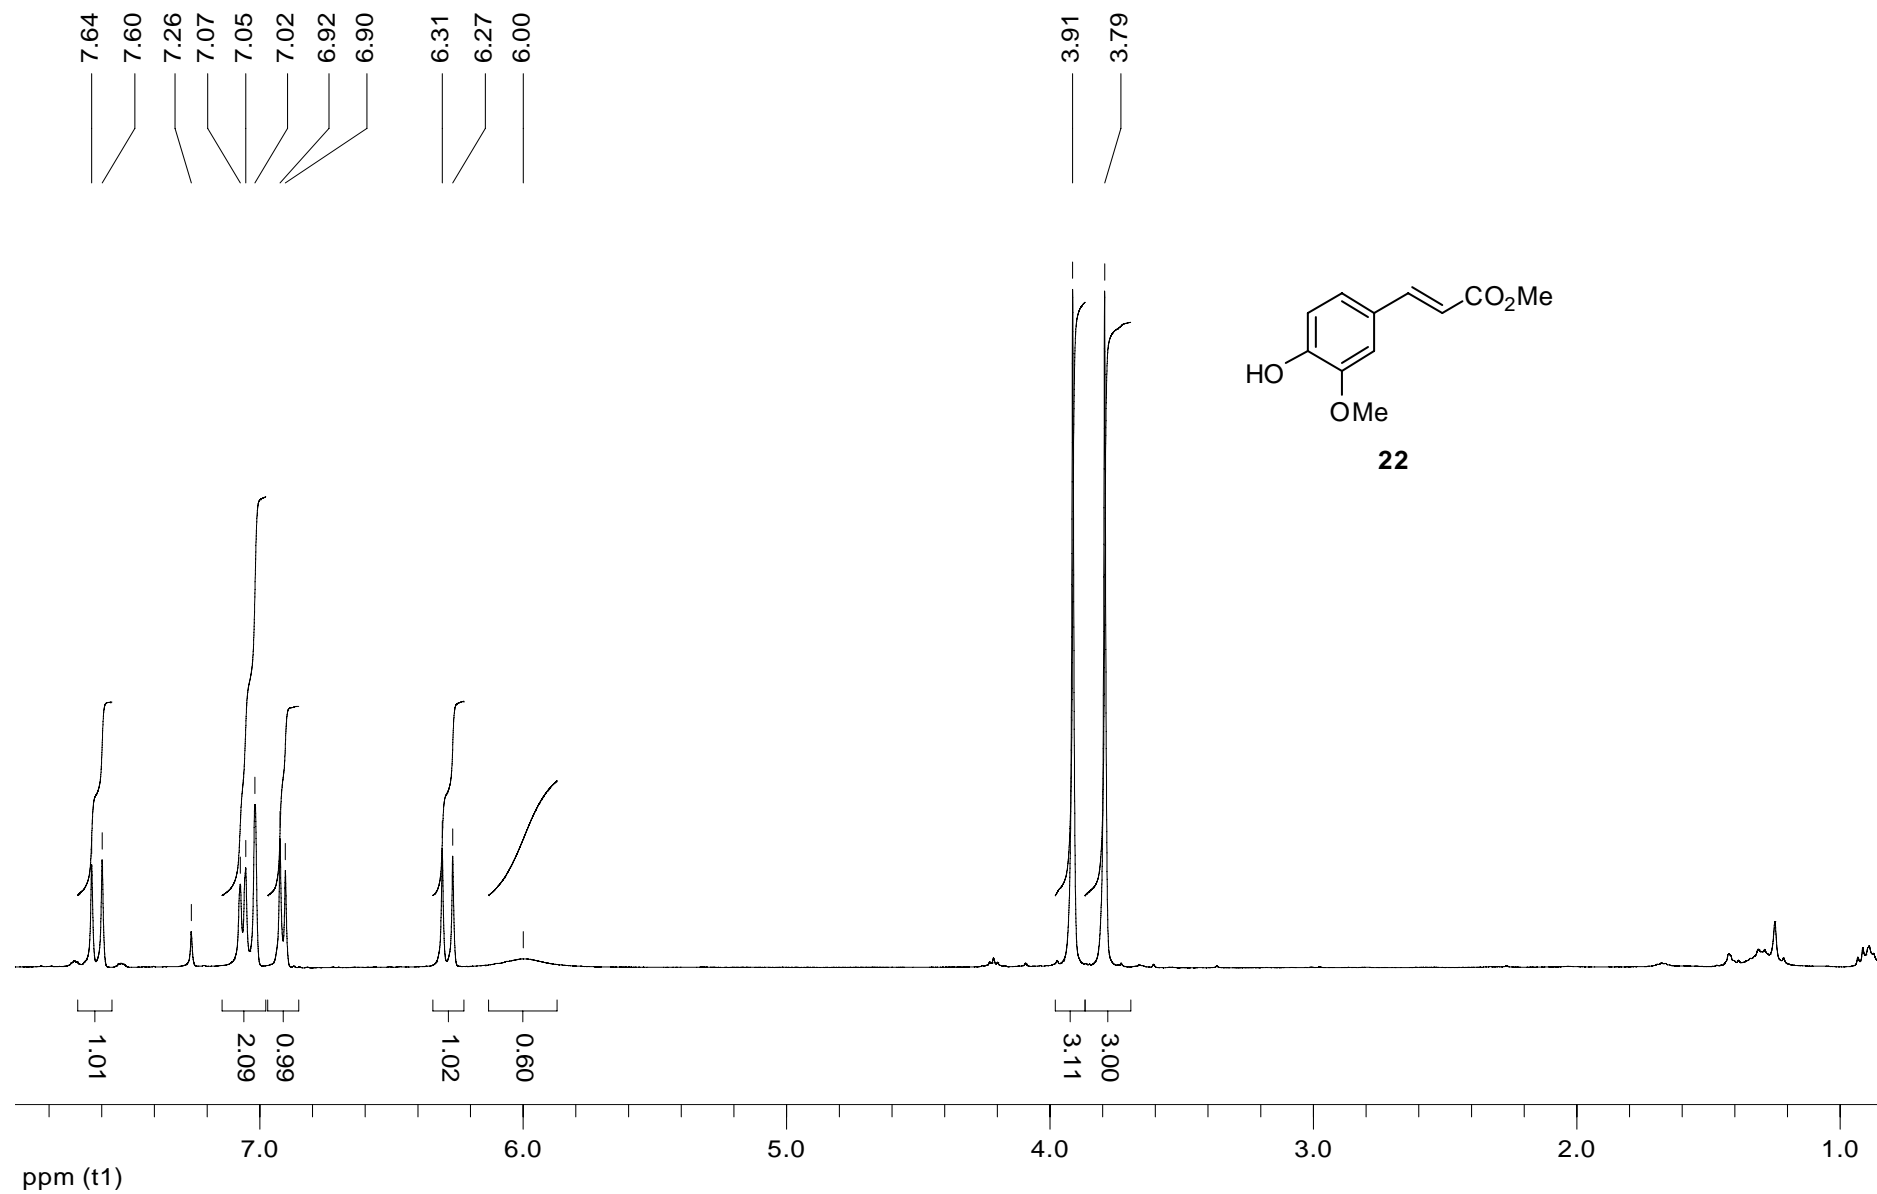

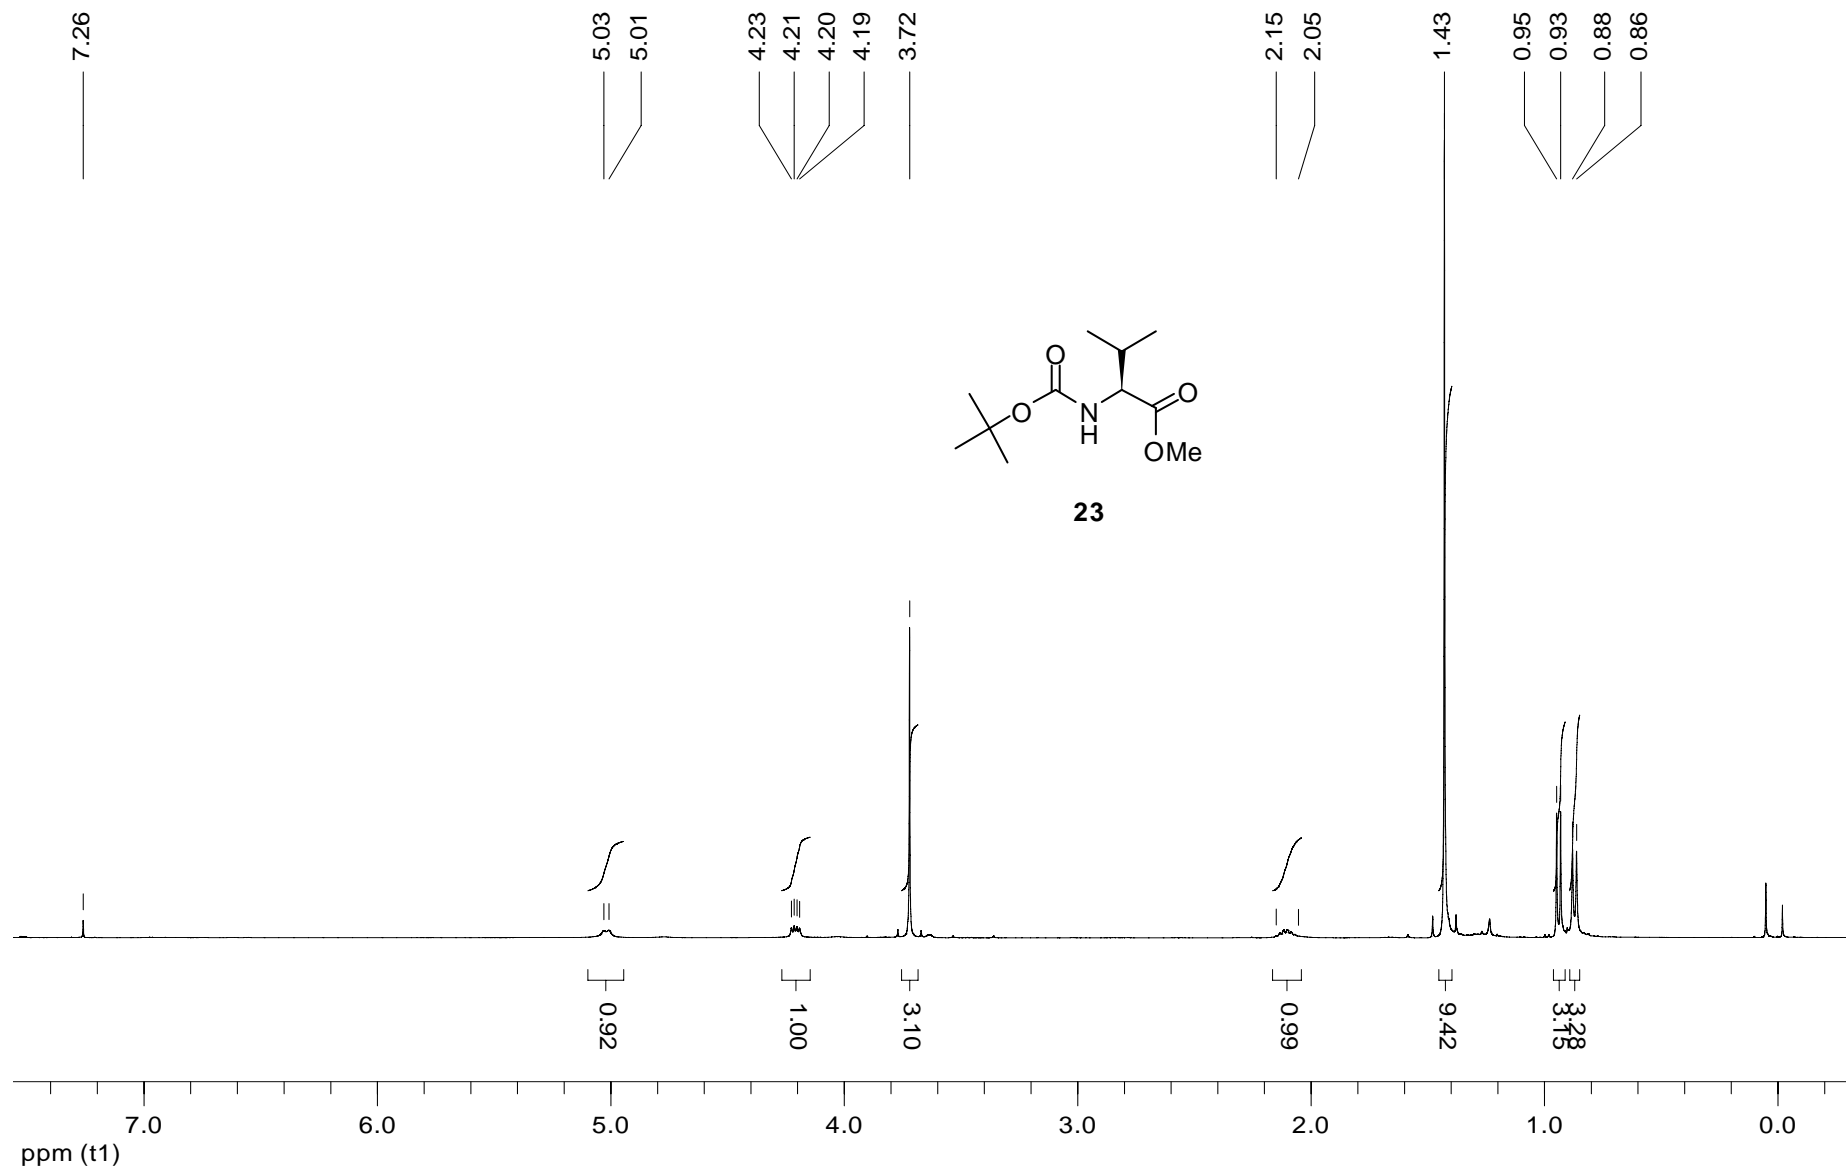

Supplement: figlushartley_nmr_products_esi3.pdf [file figlushartley_nmr_products_esi3.pdf]

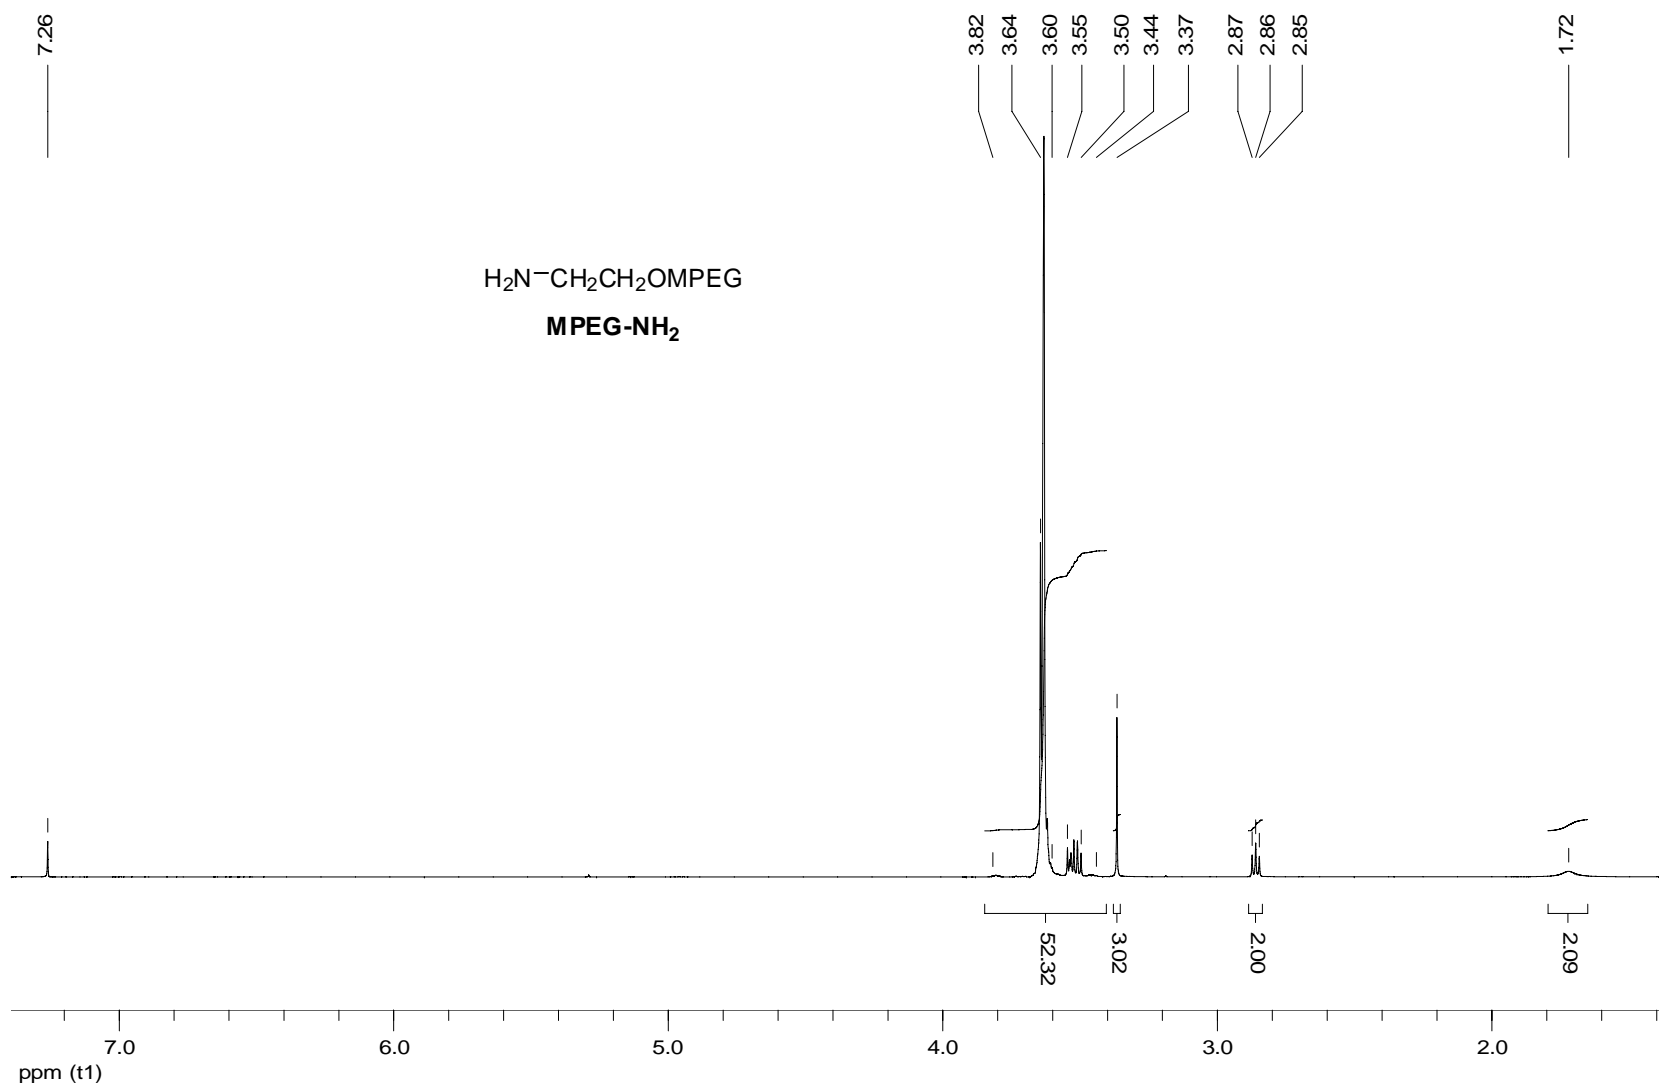

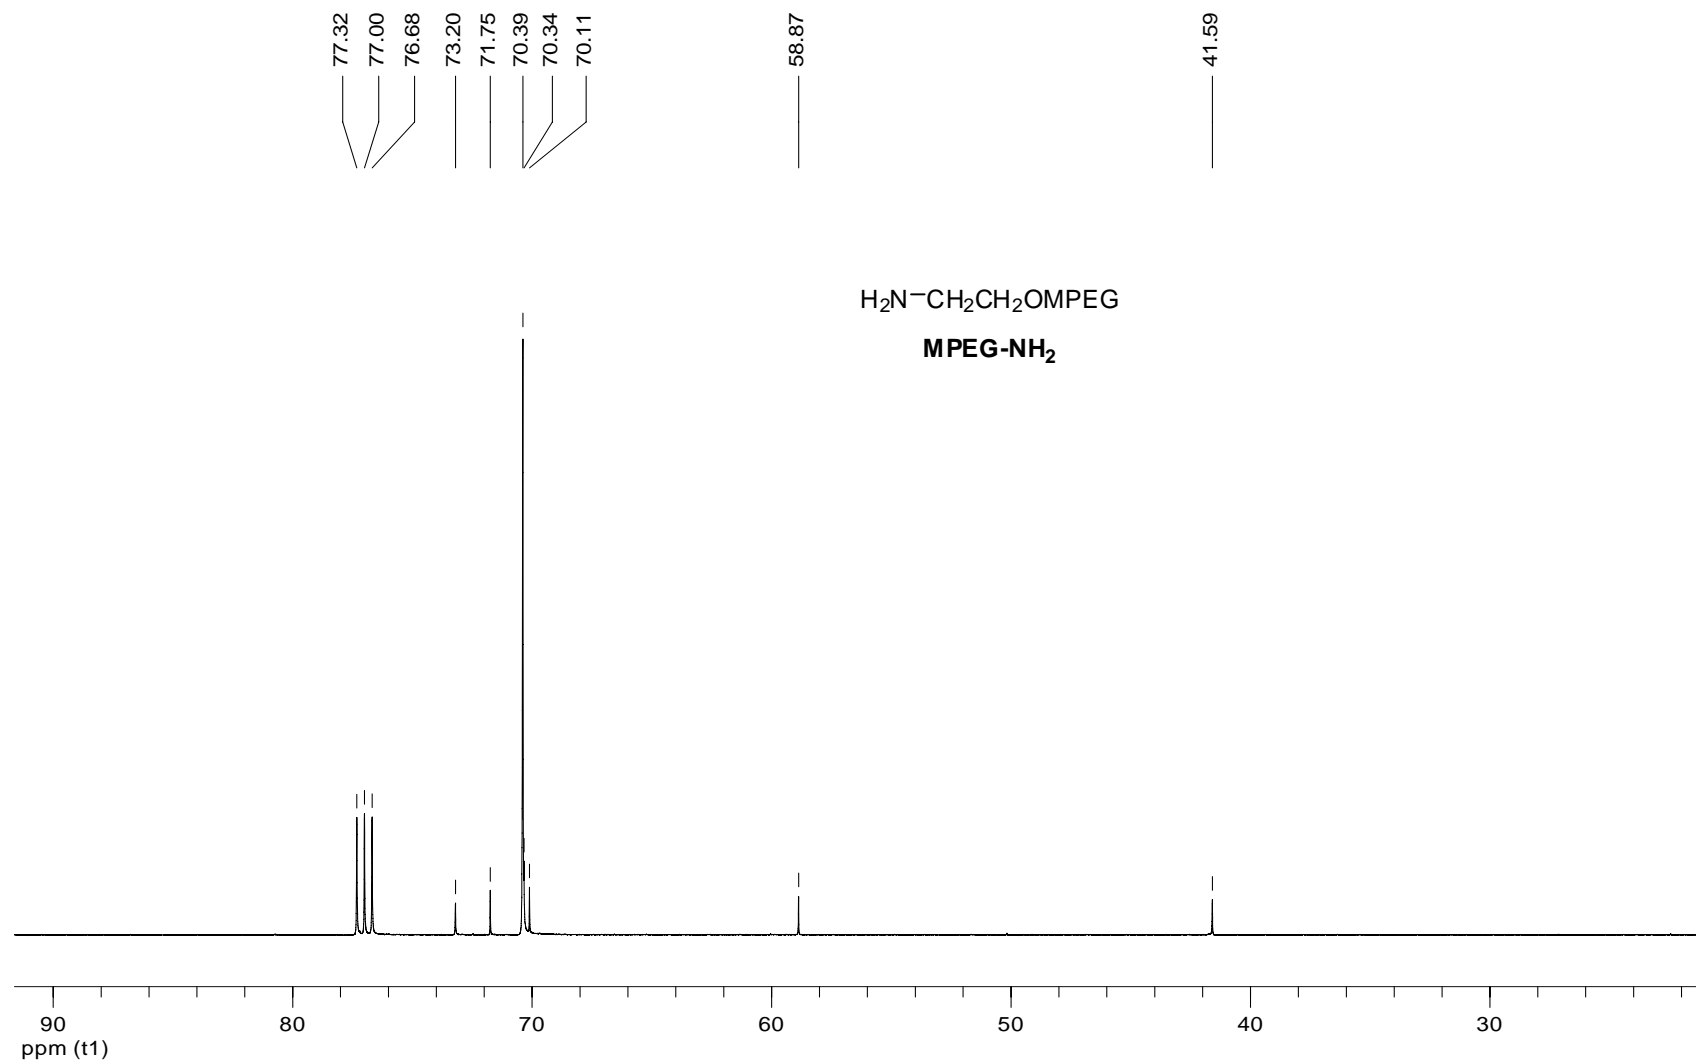

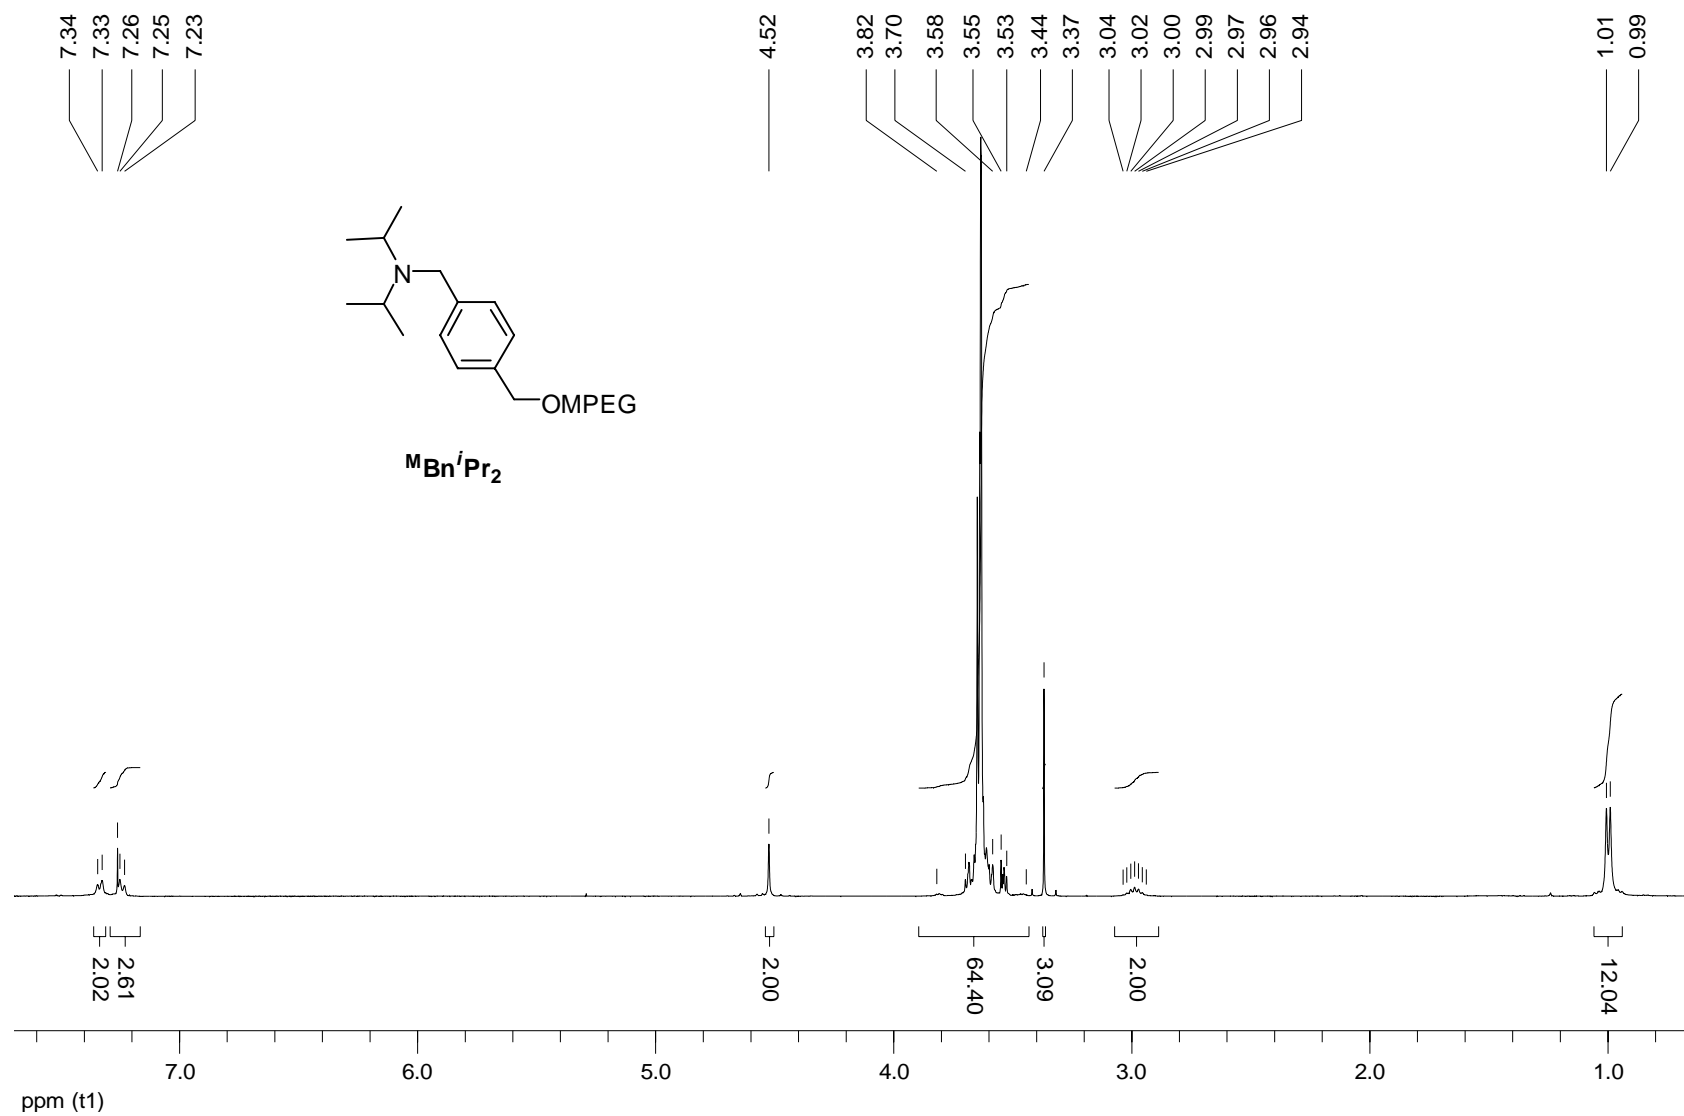

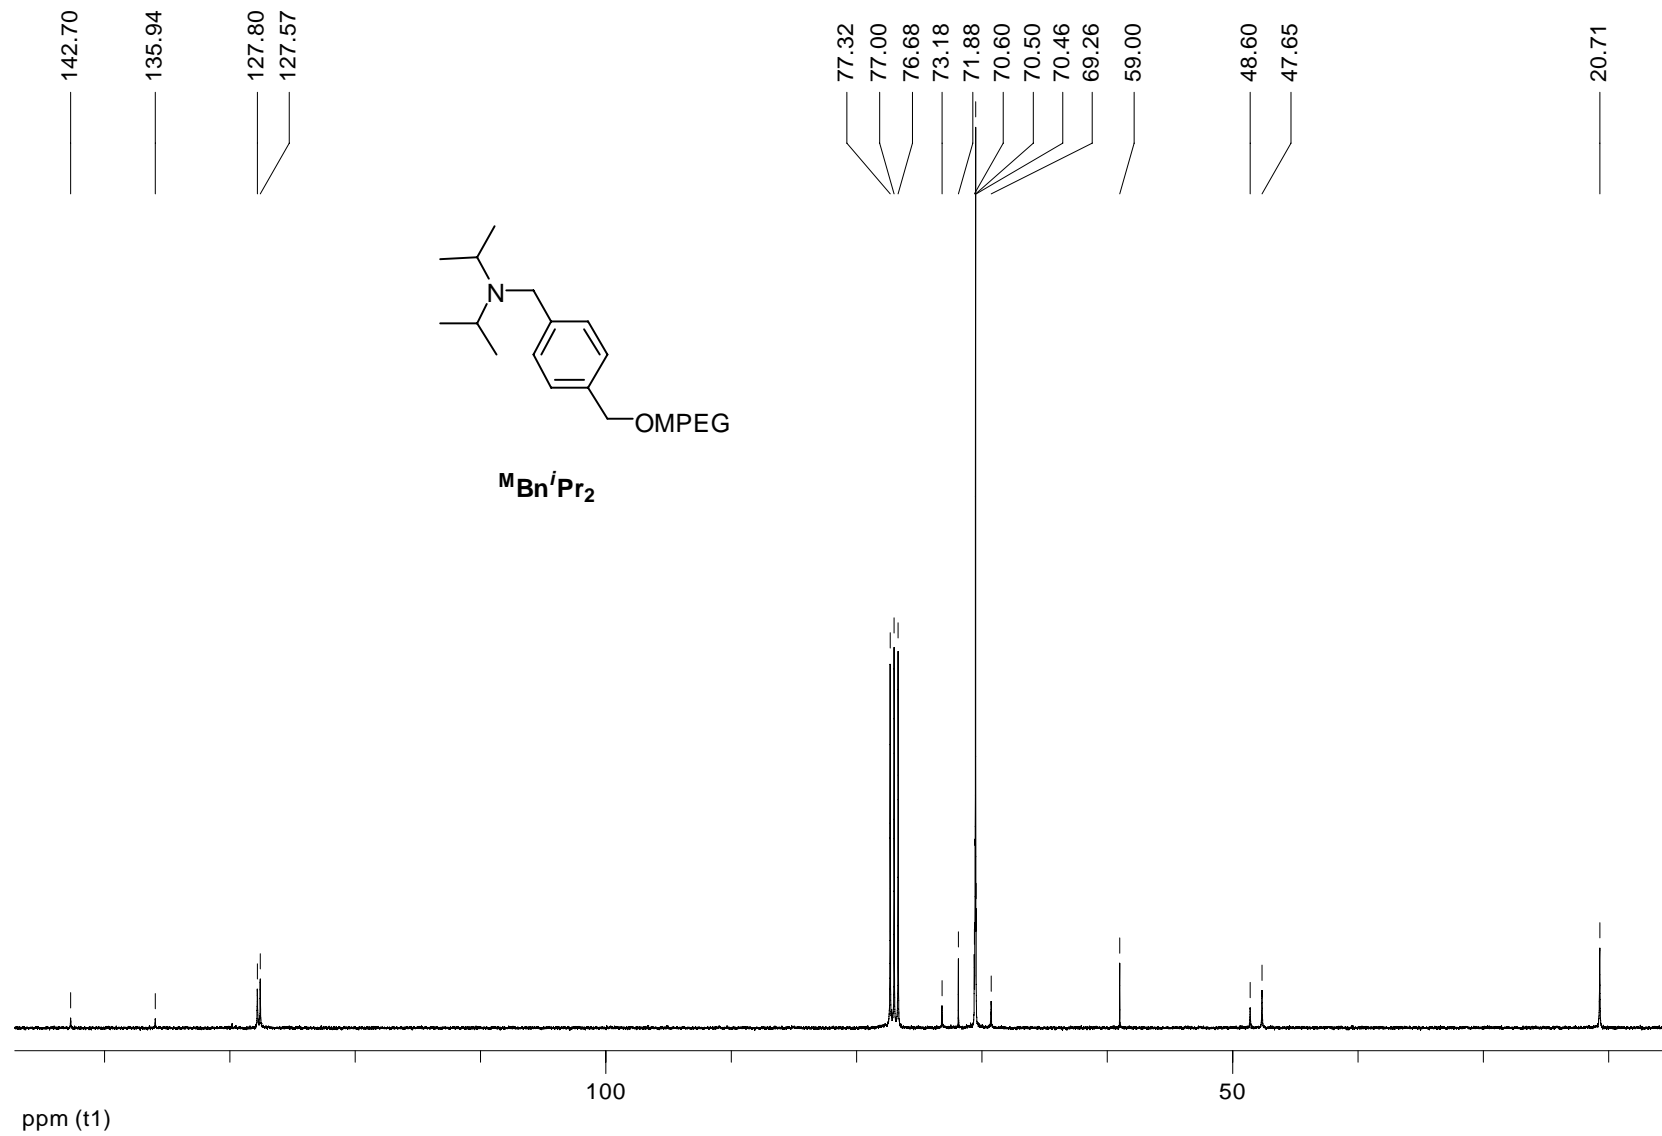

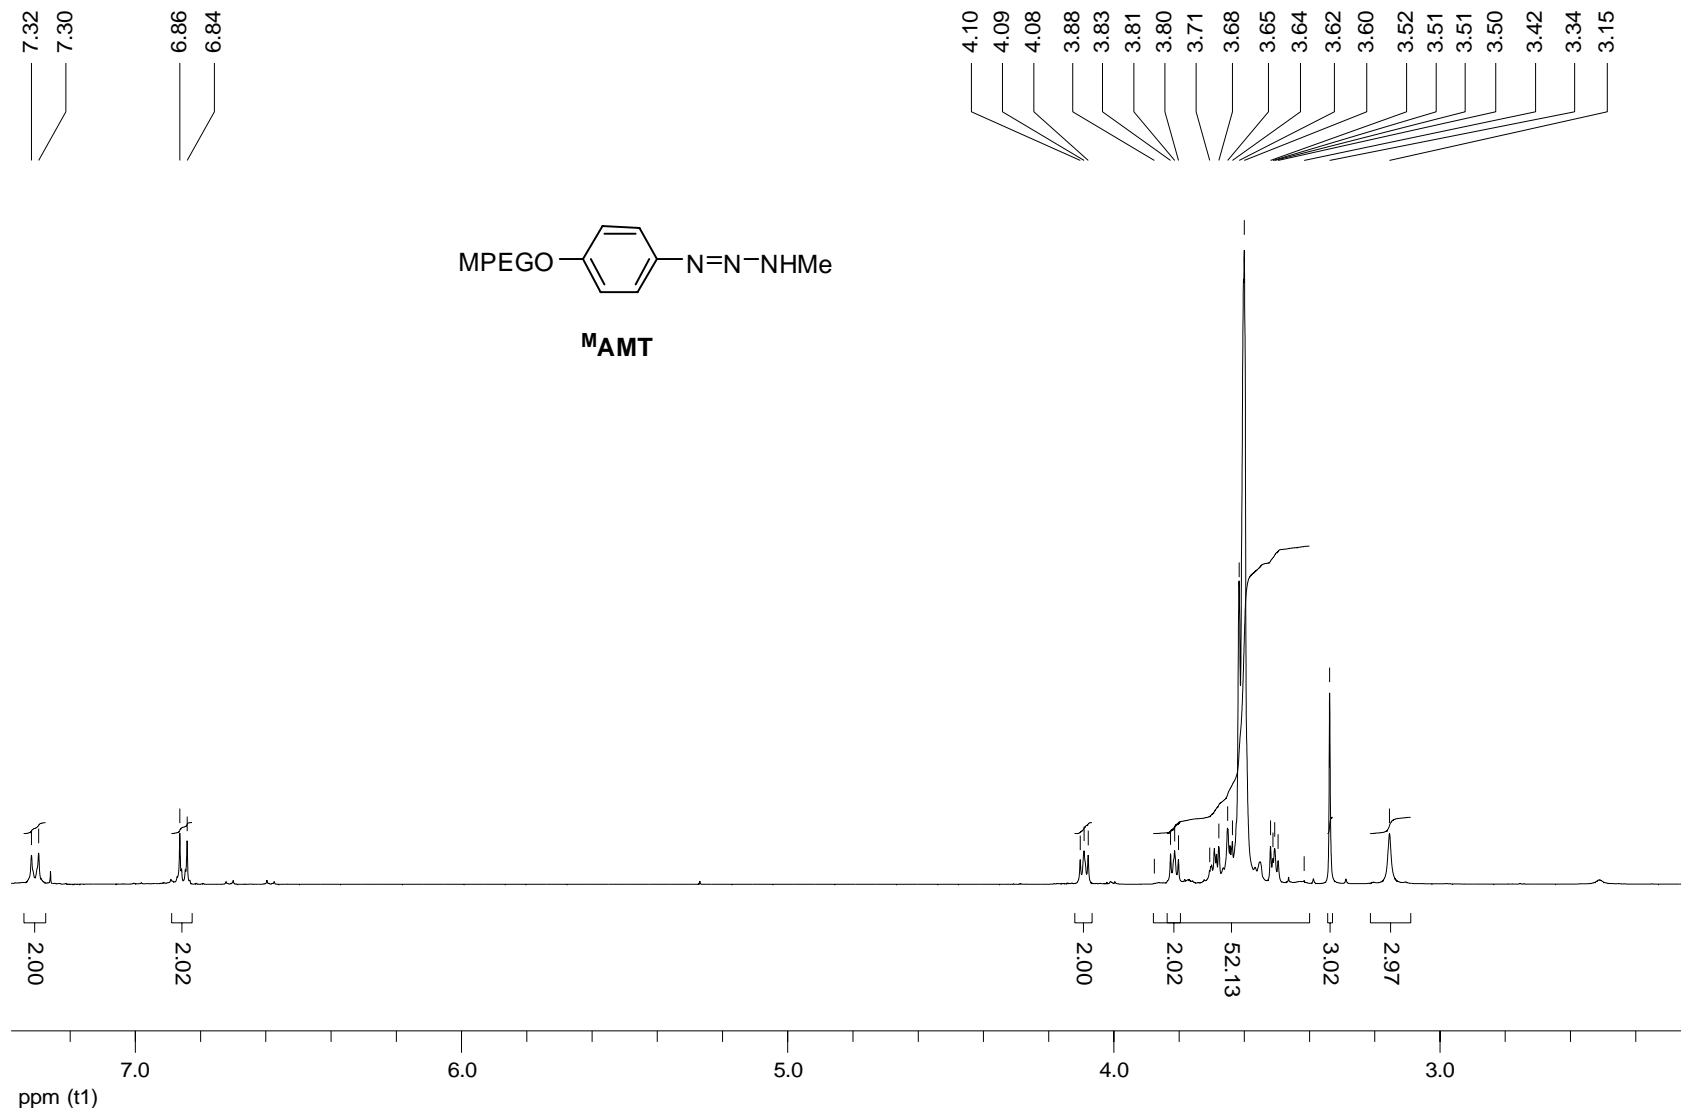

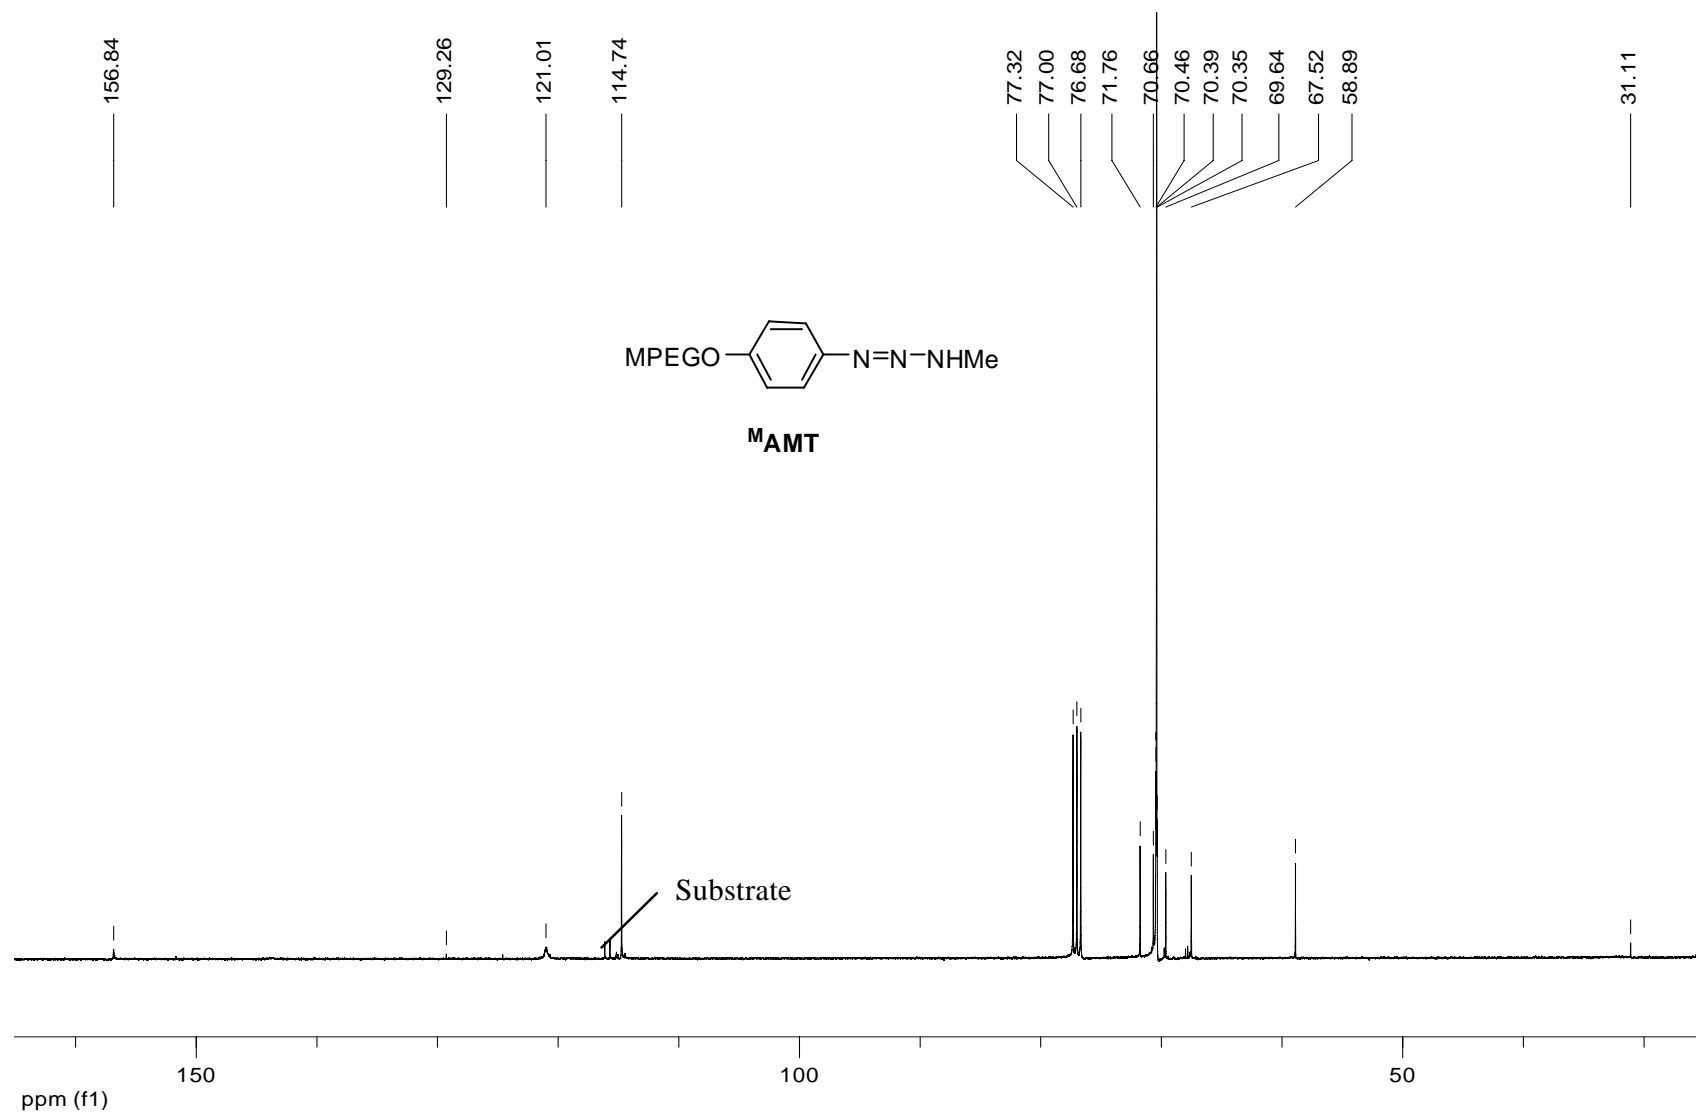

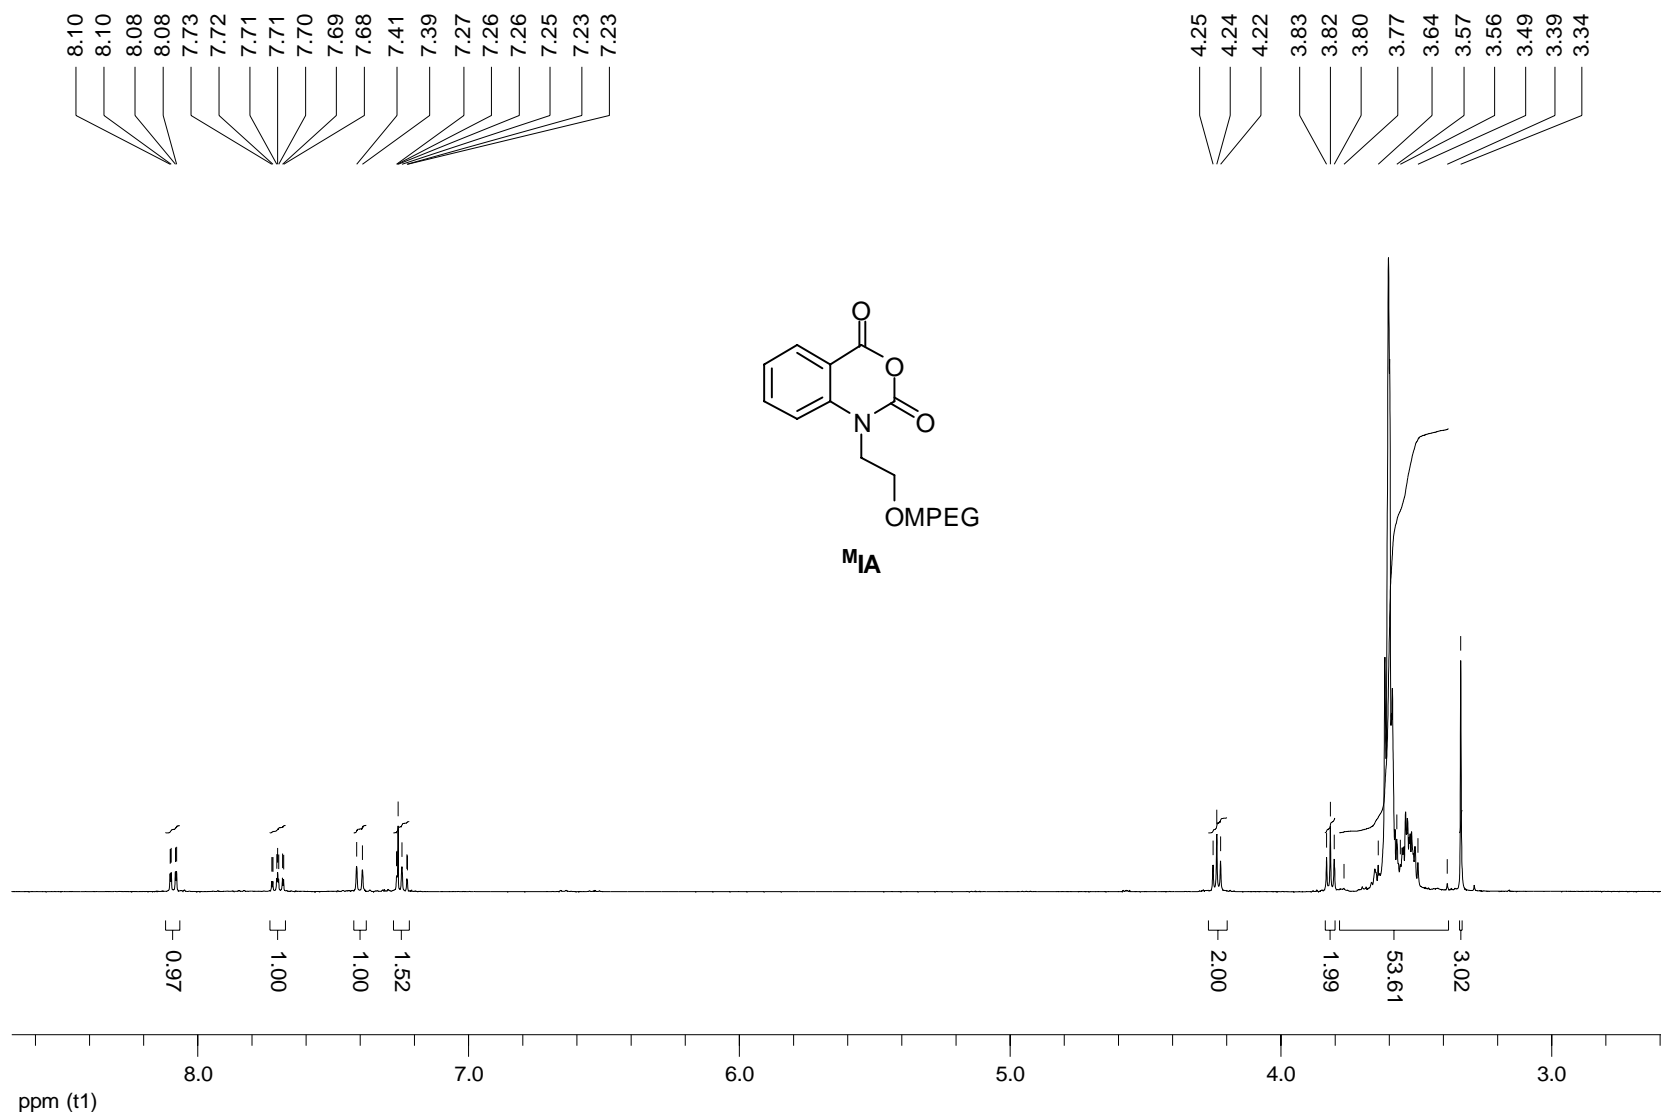

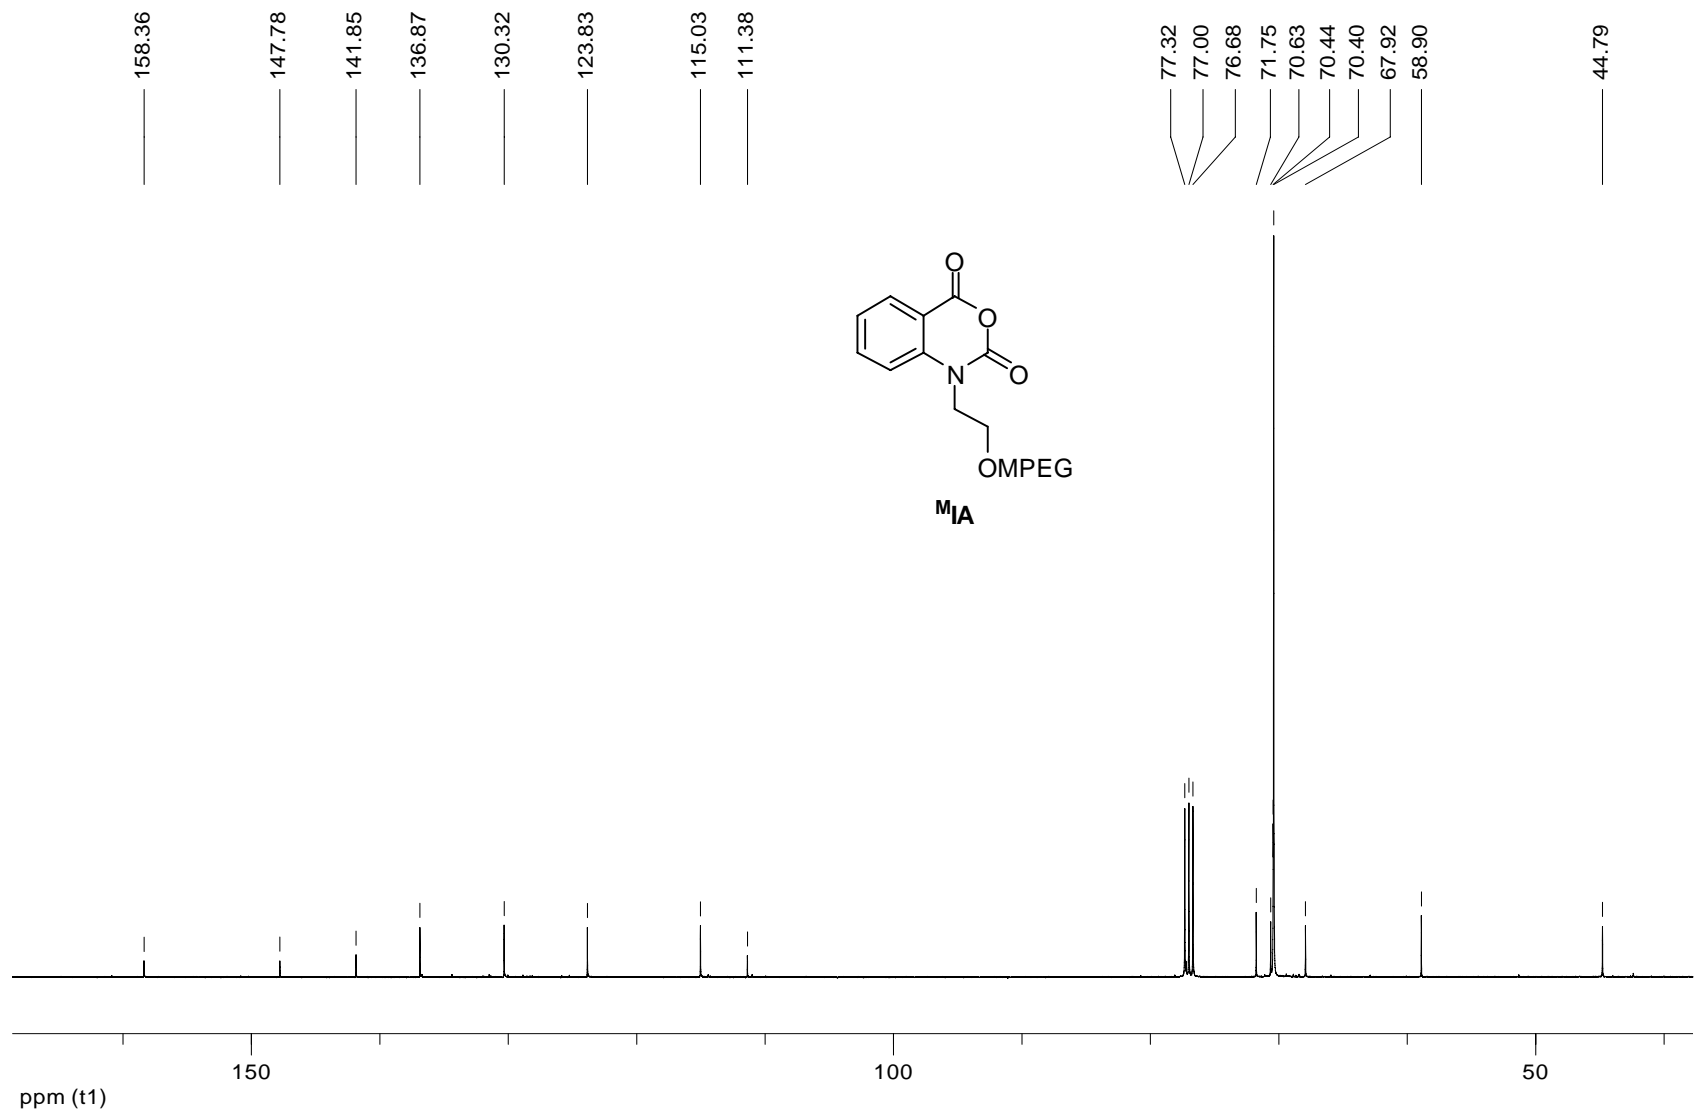



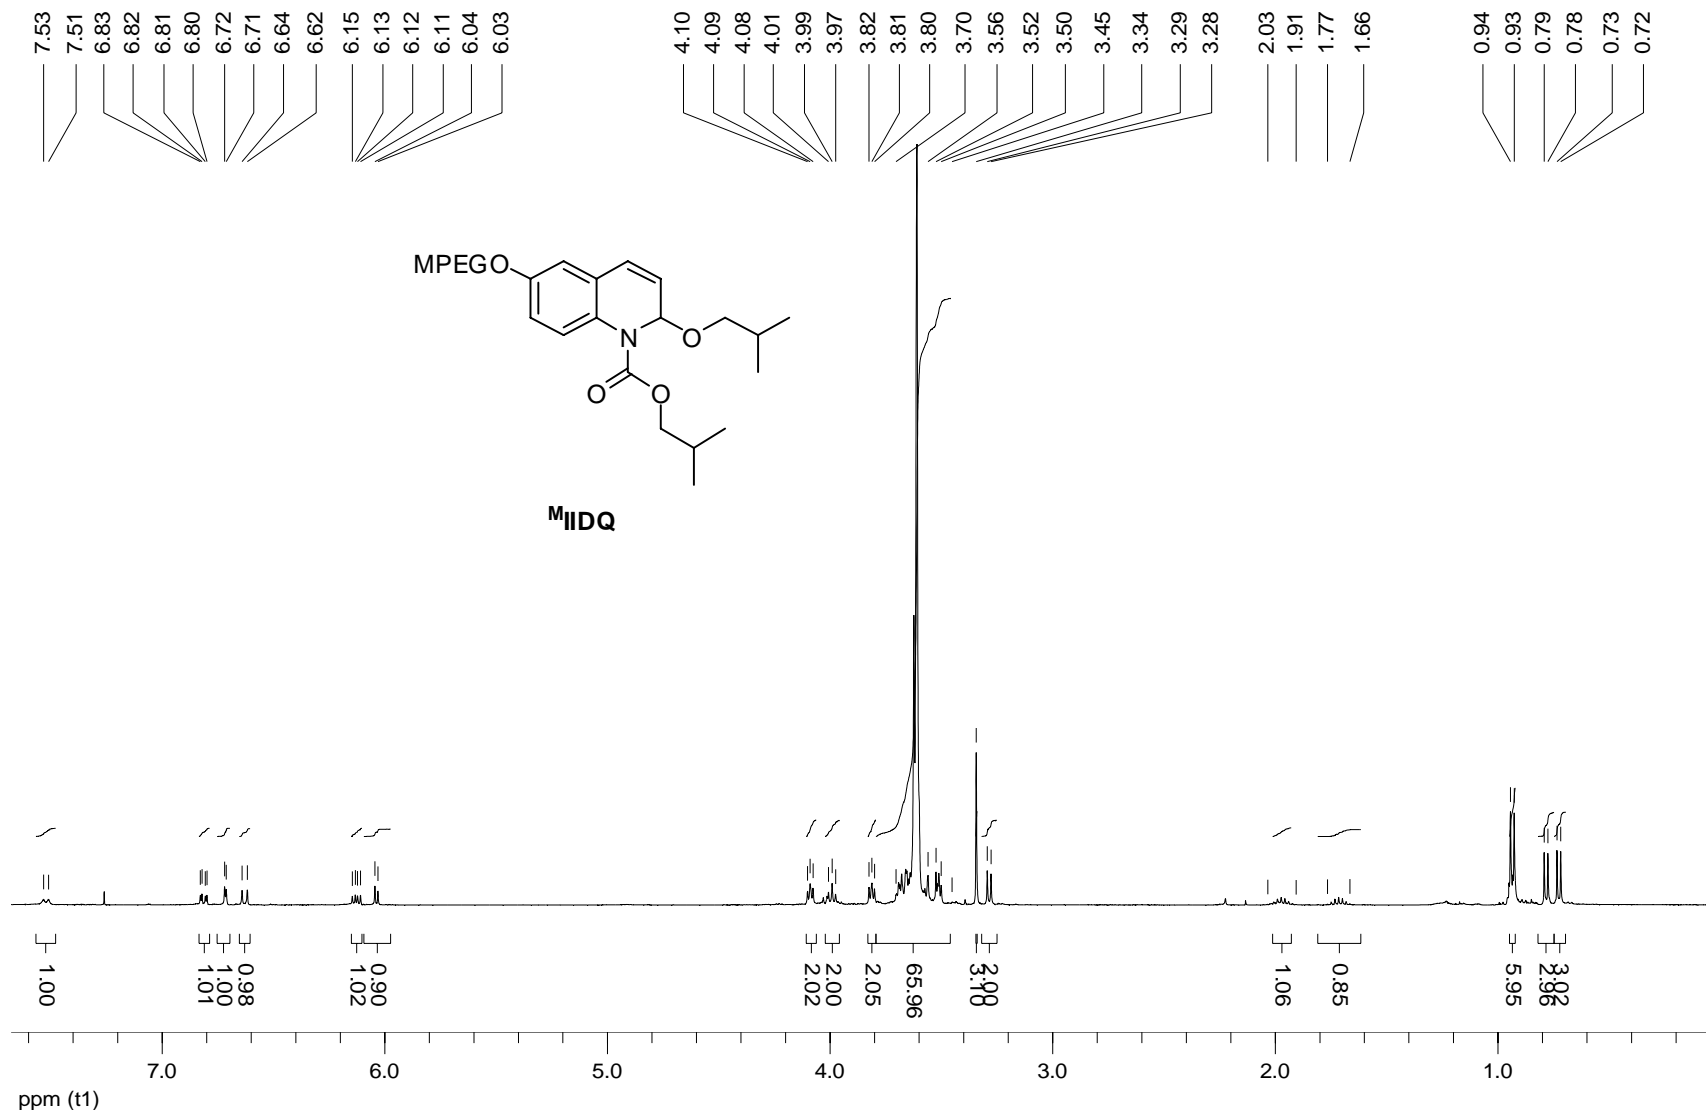

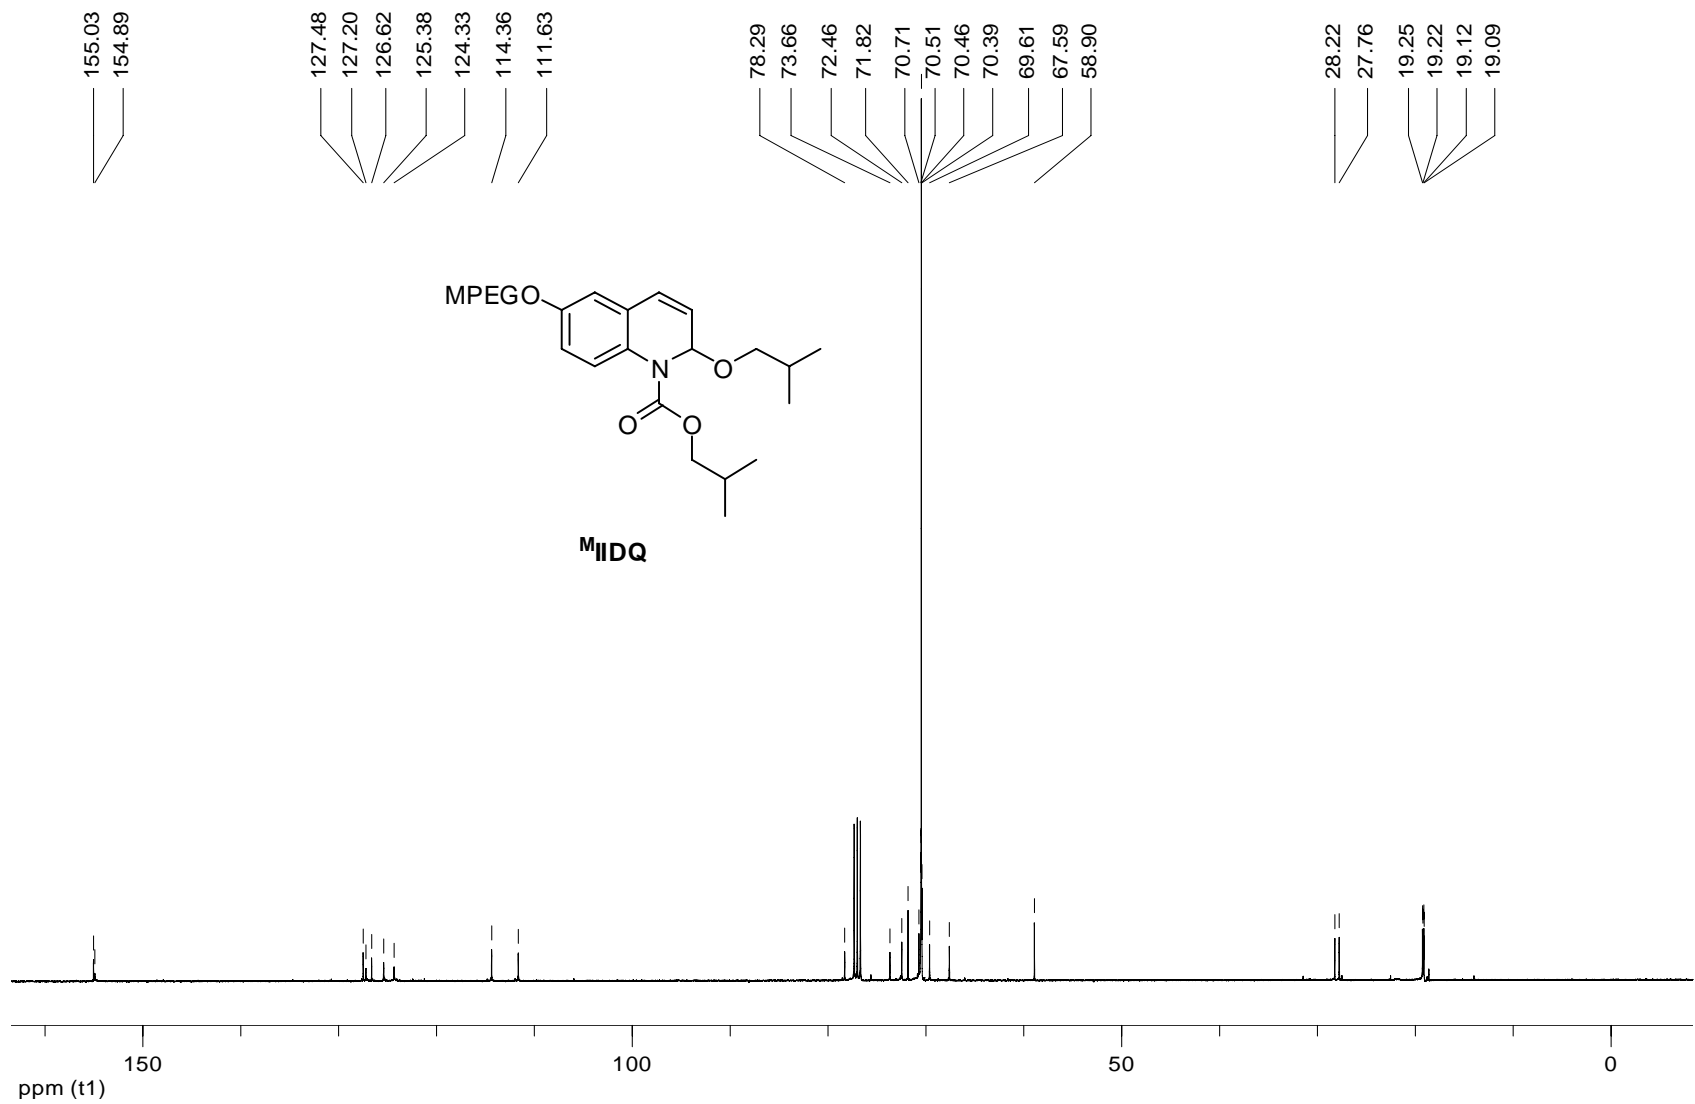

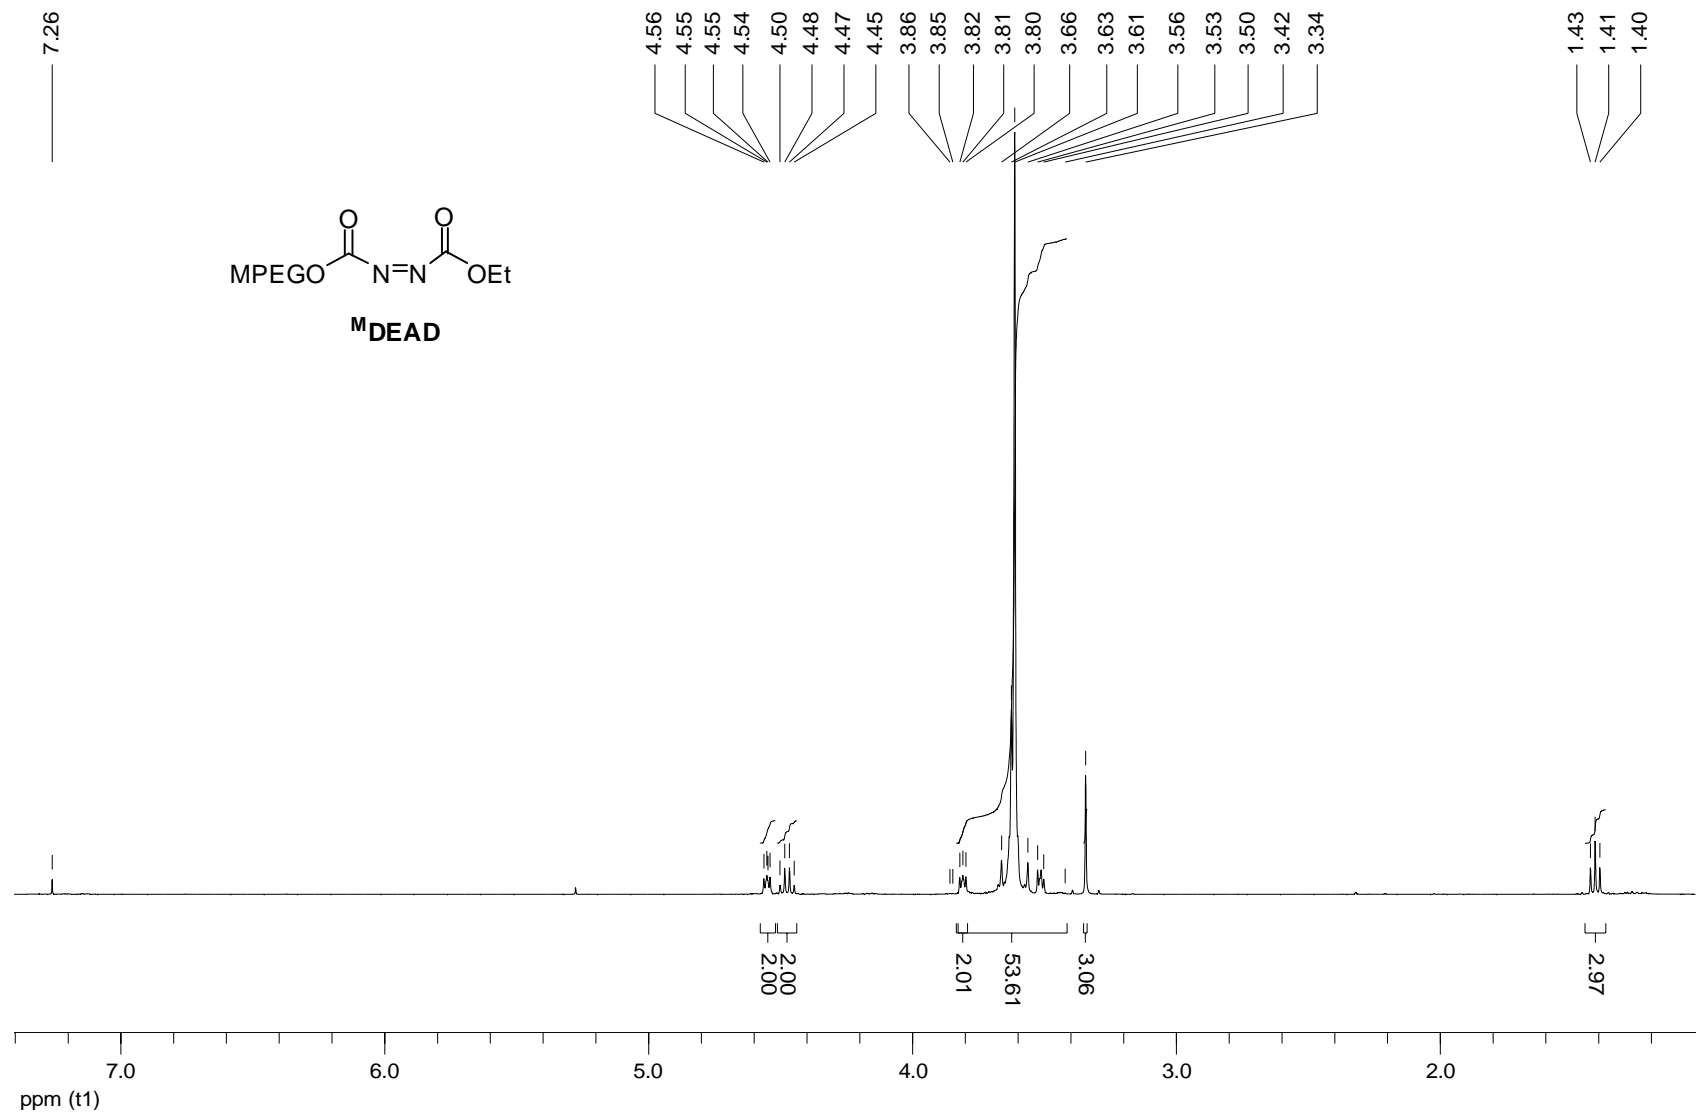

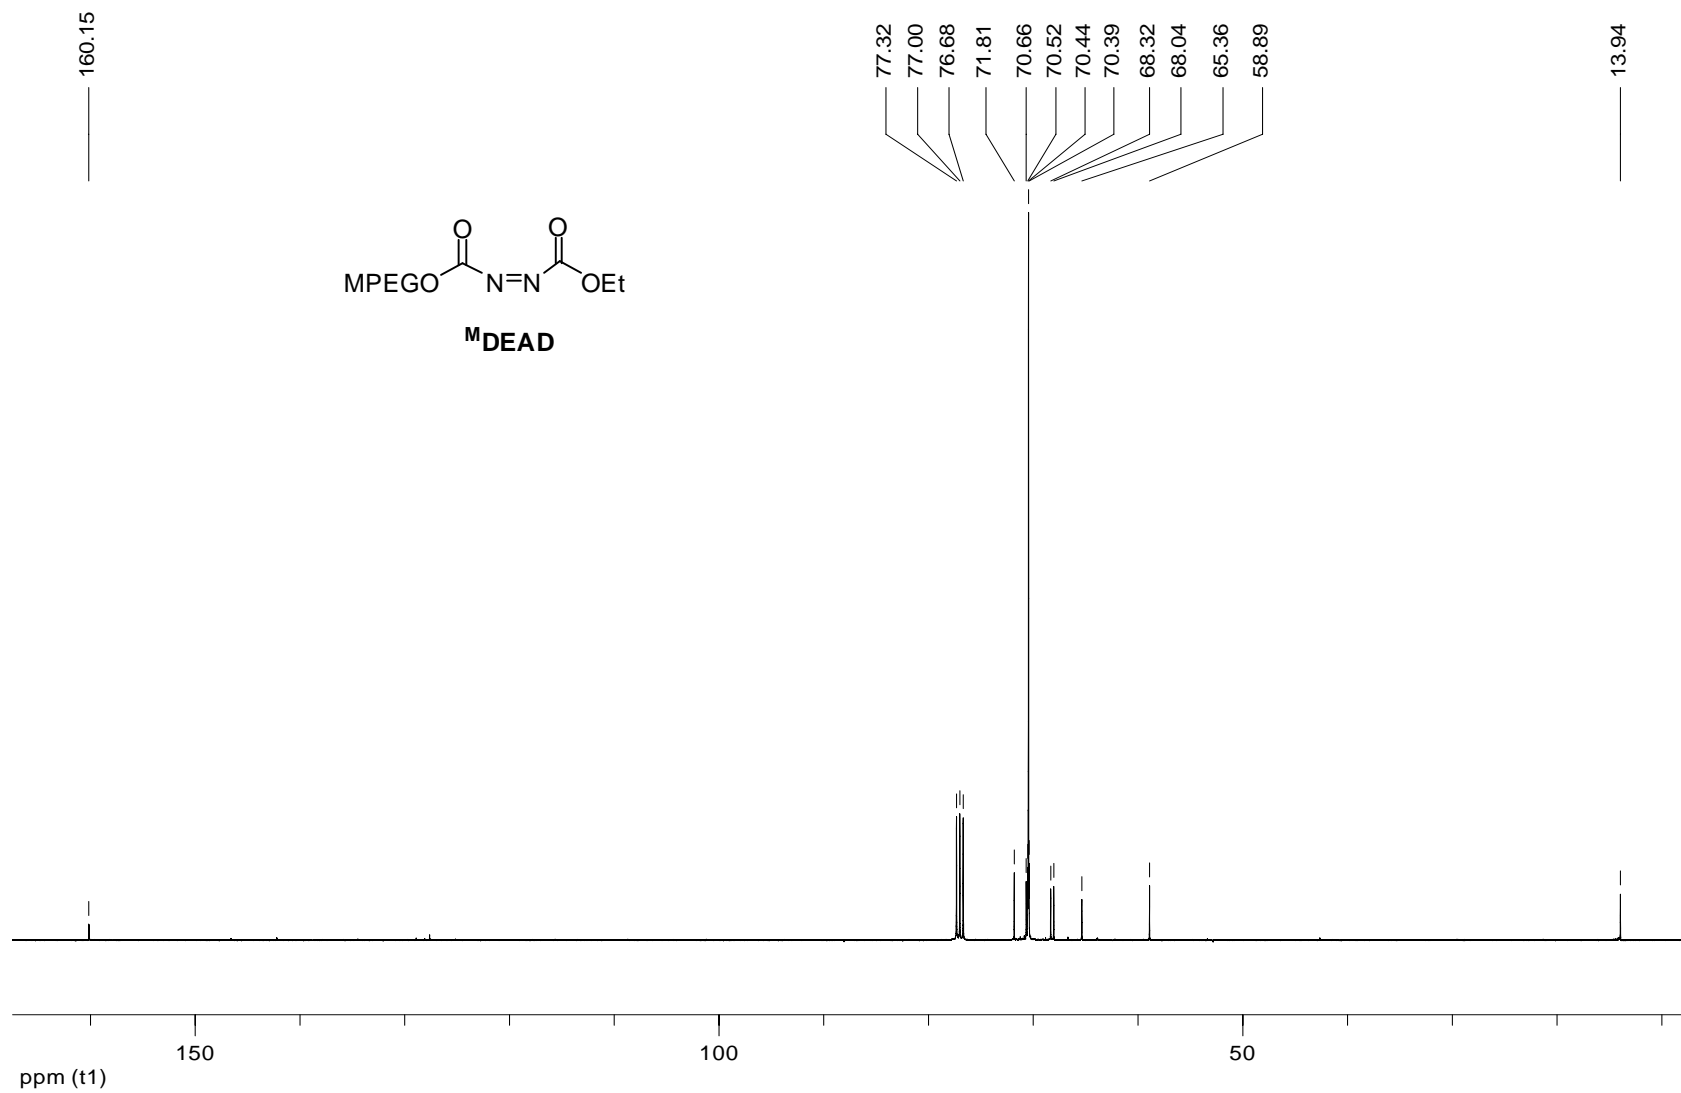

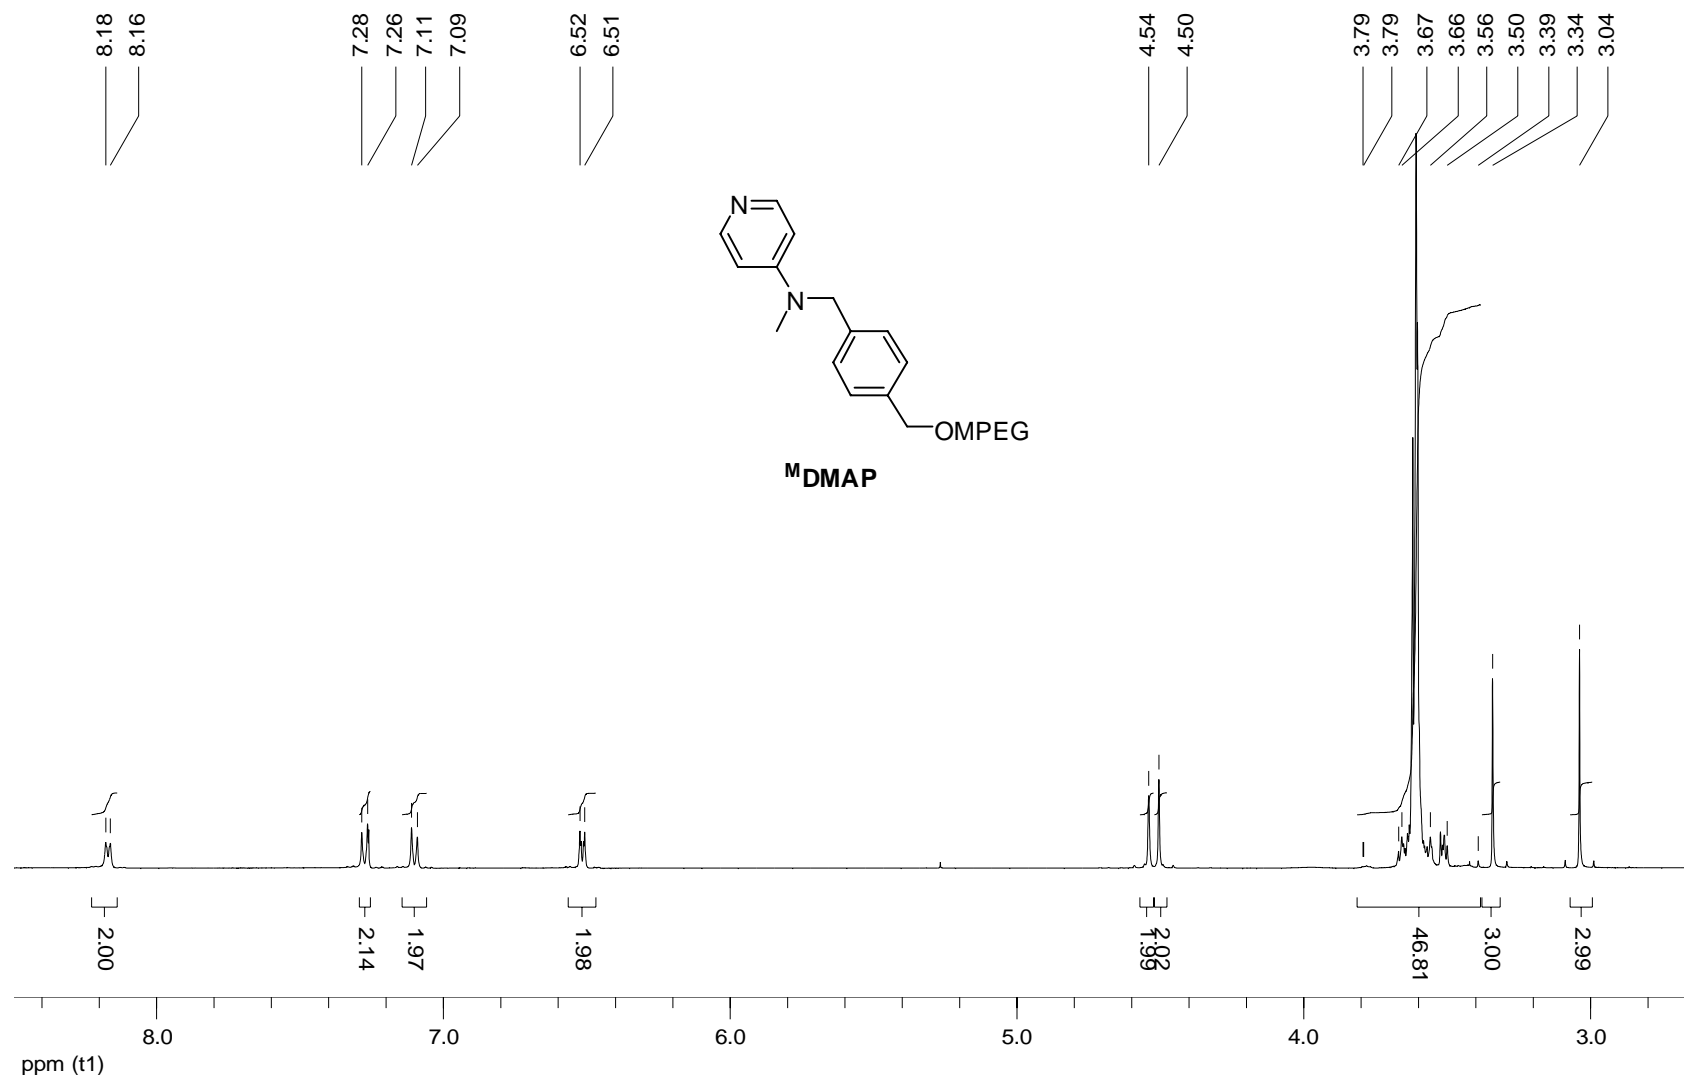

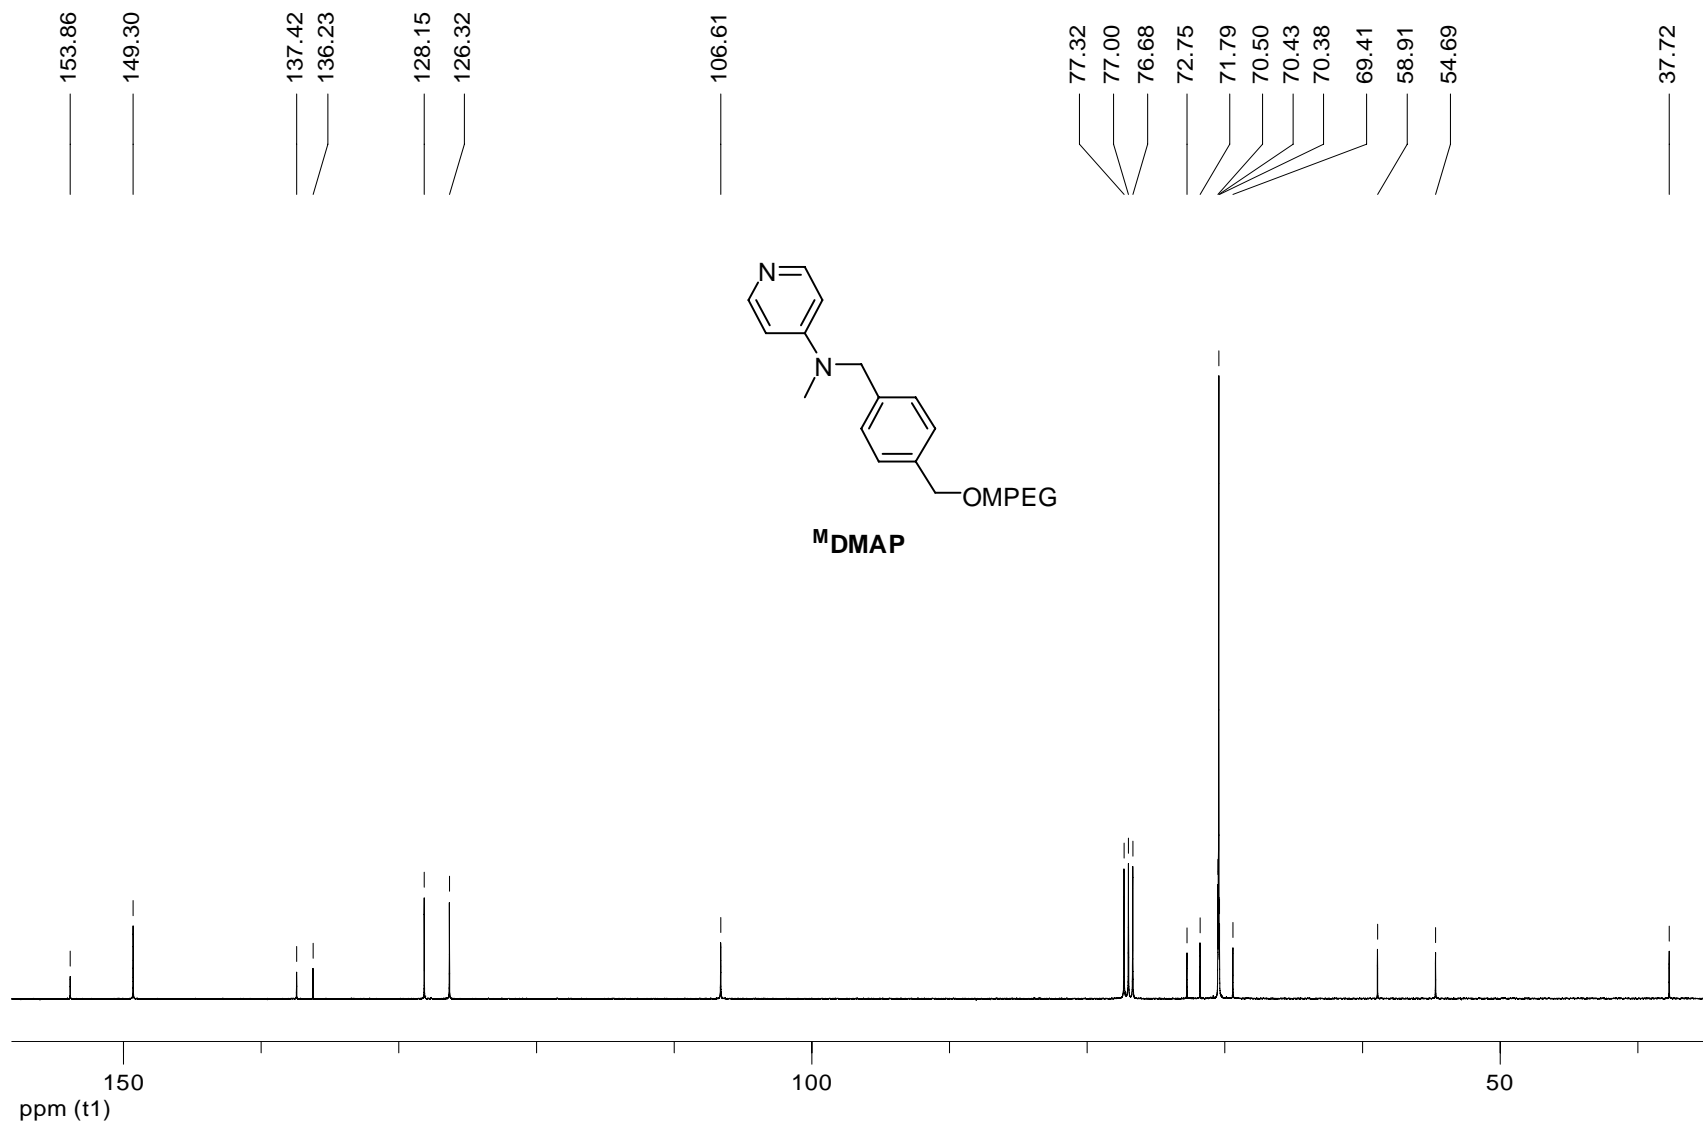

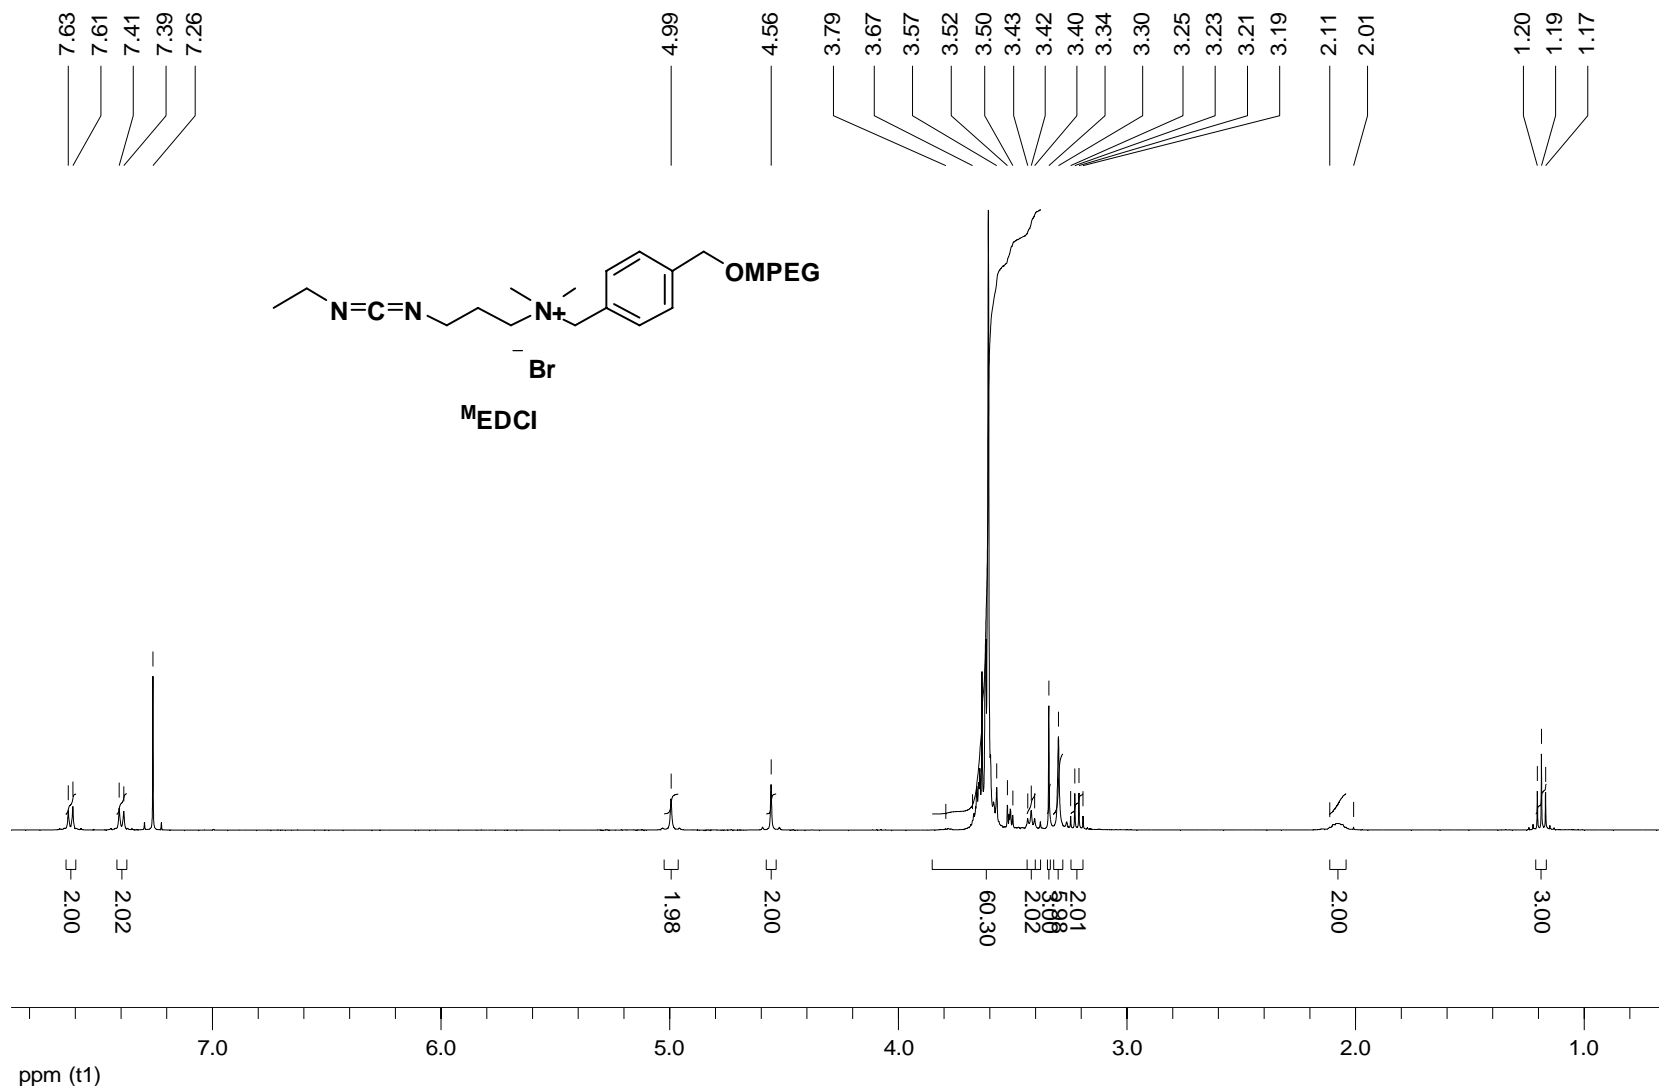

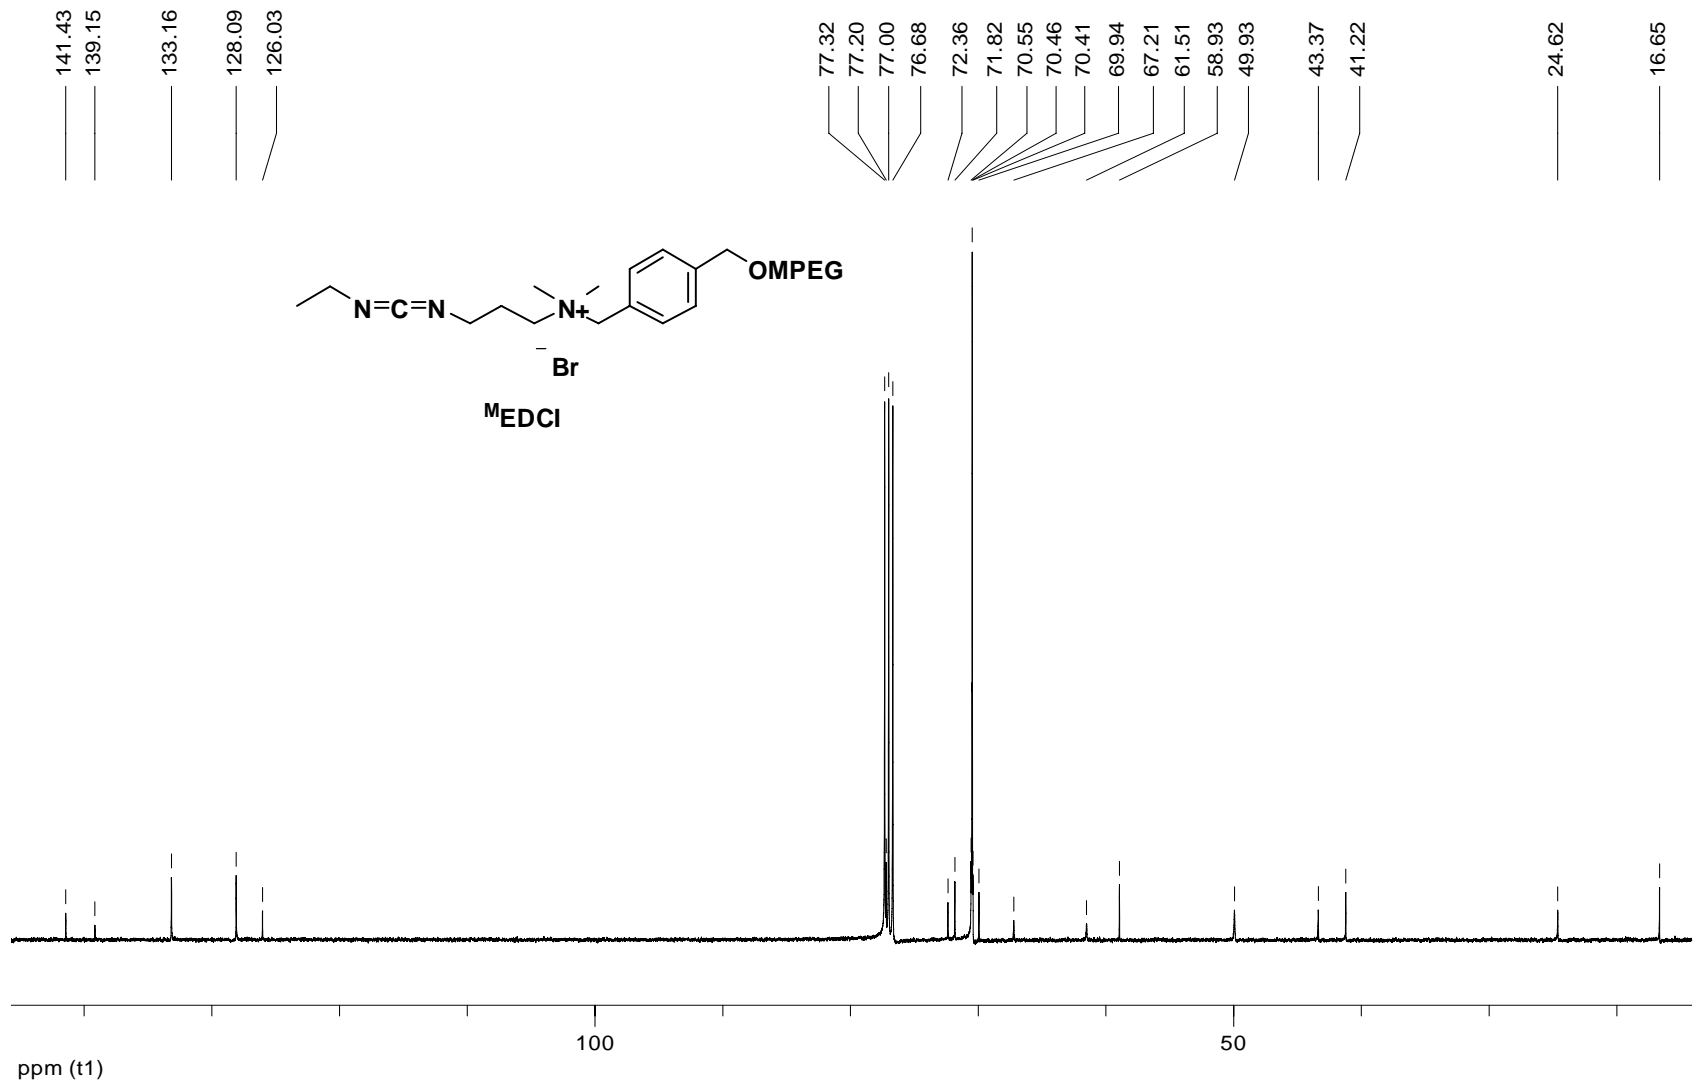



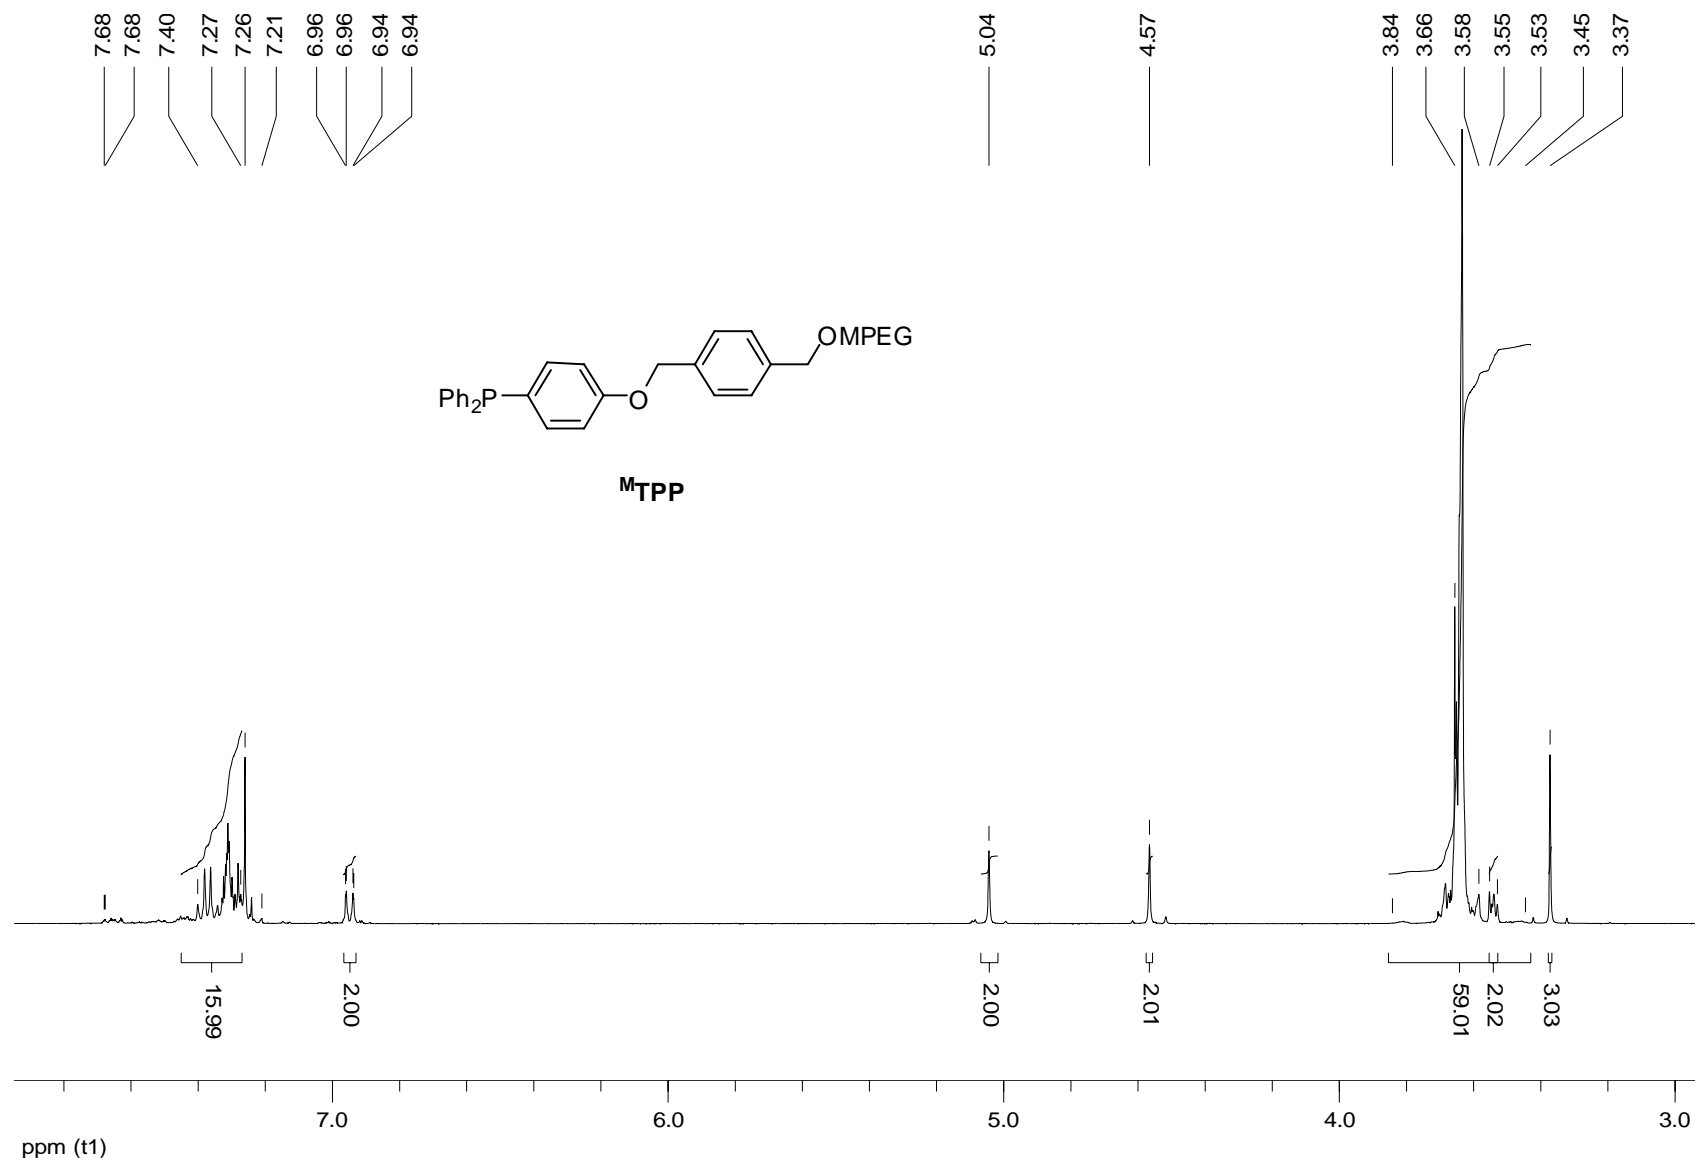

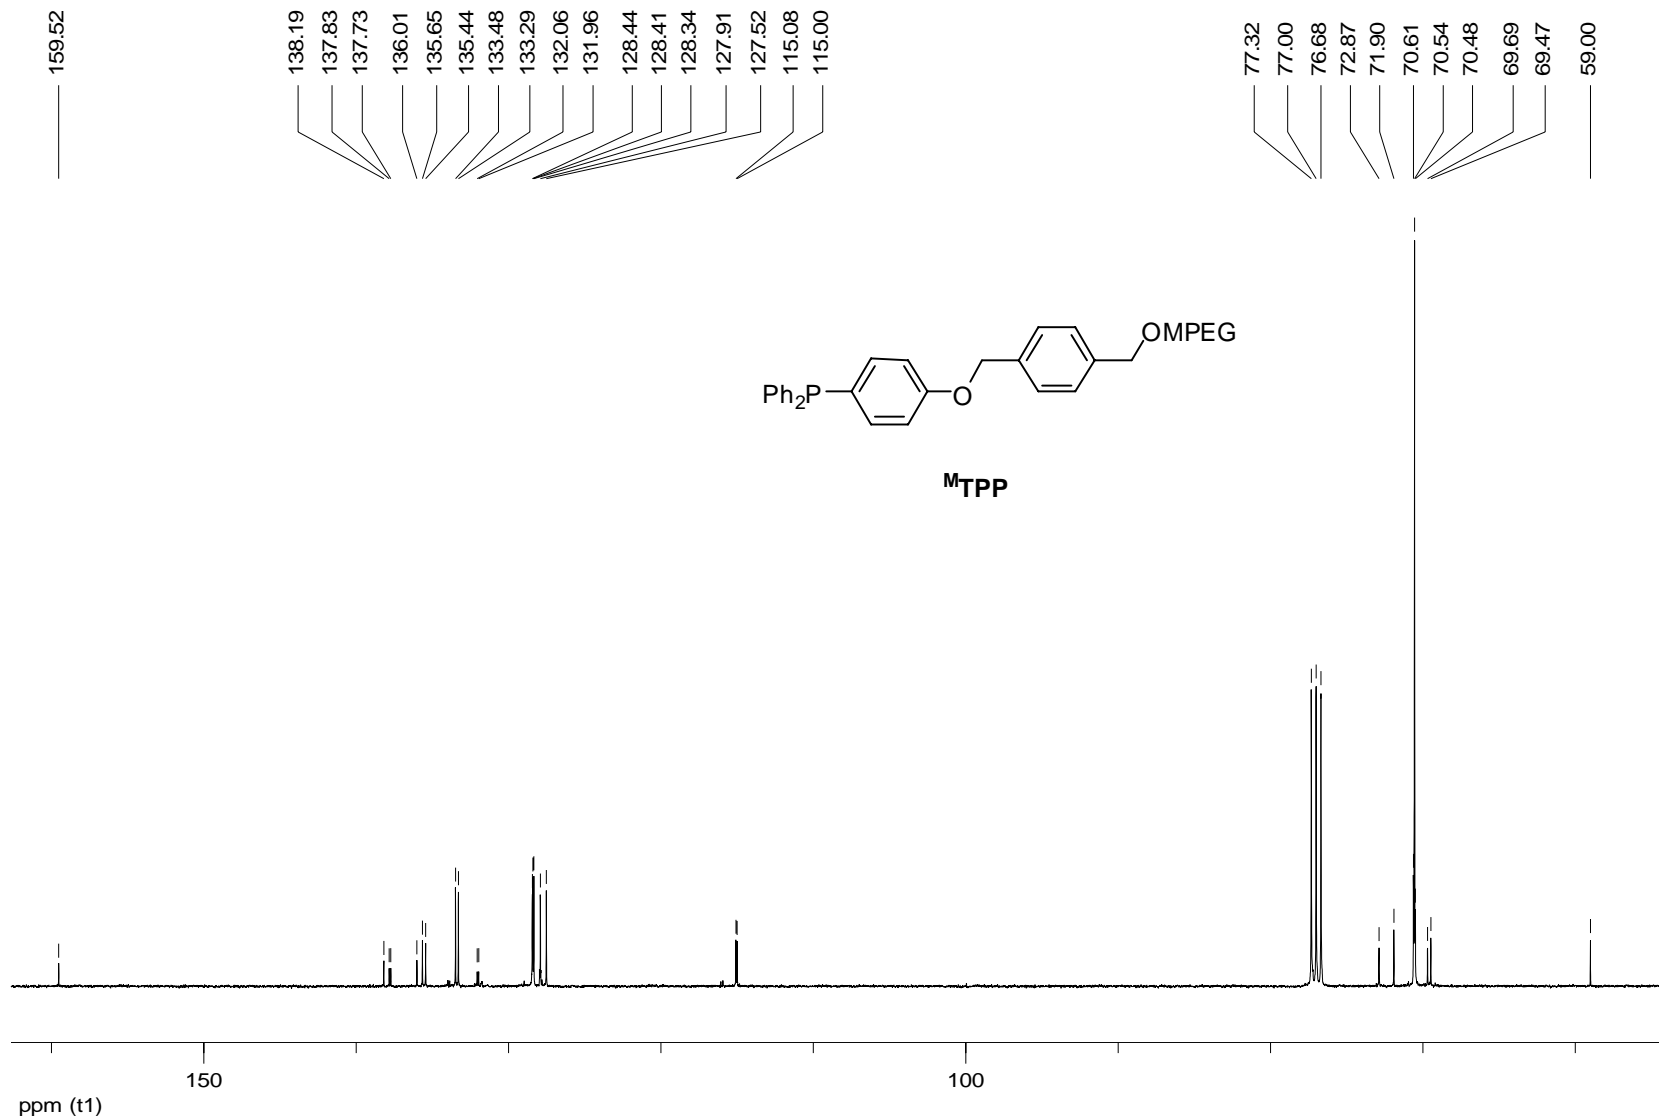

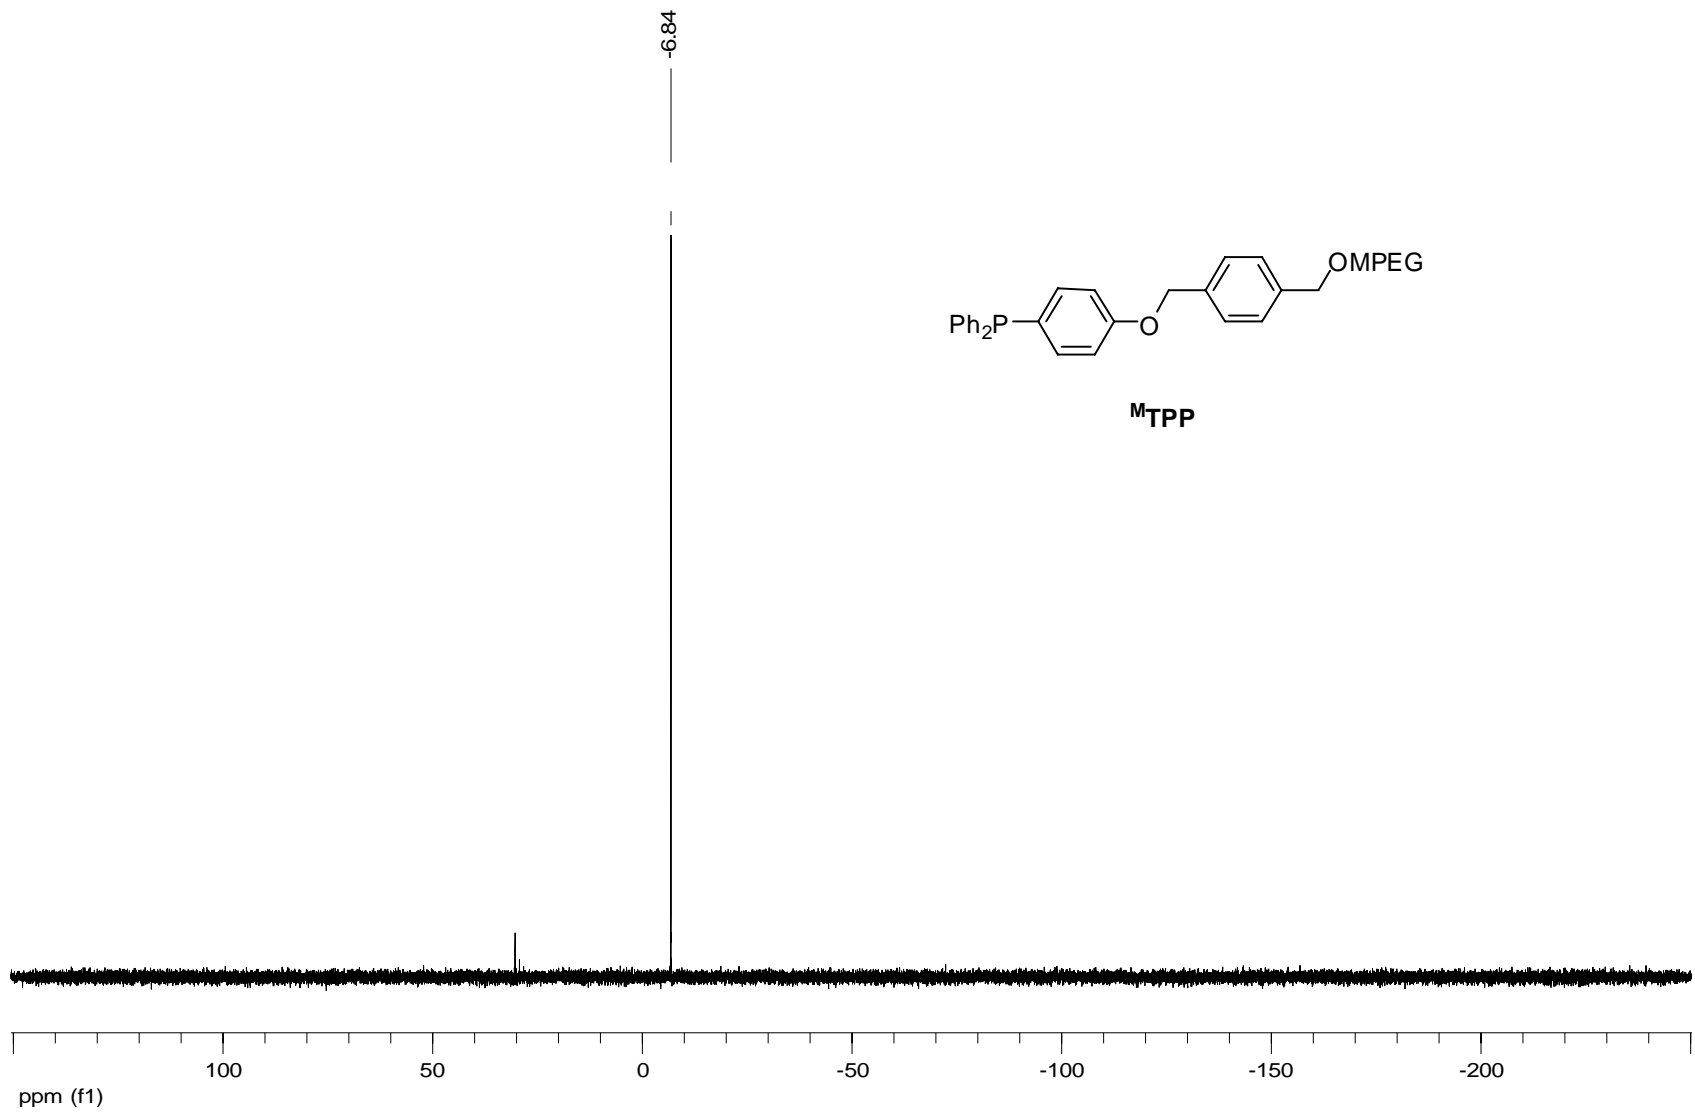

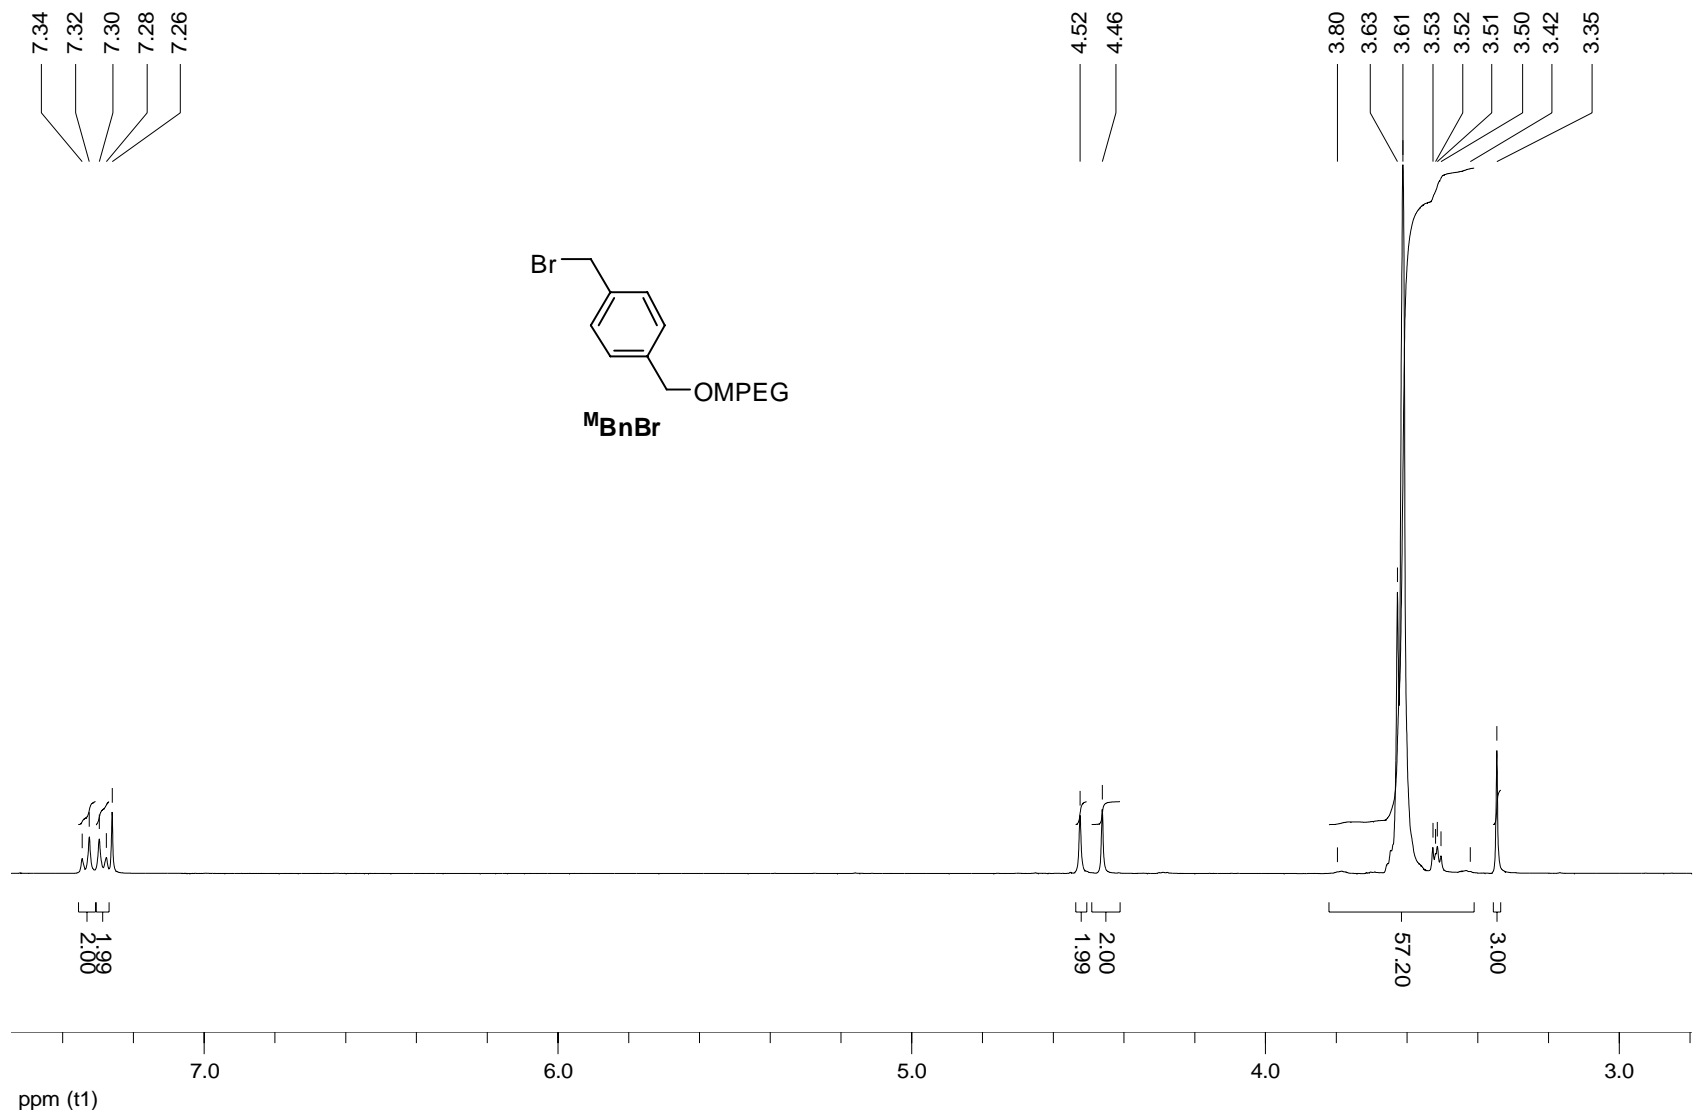

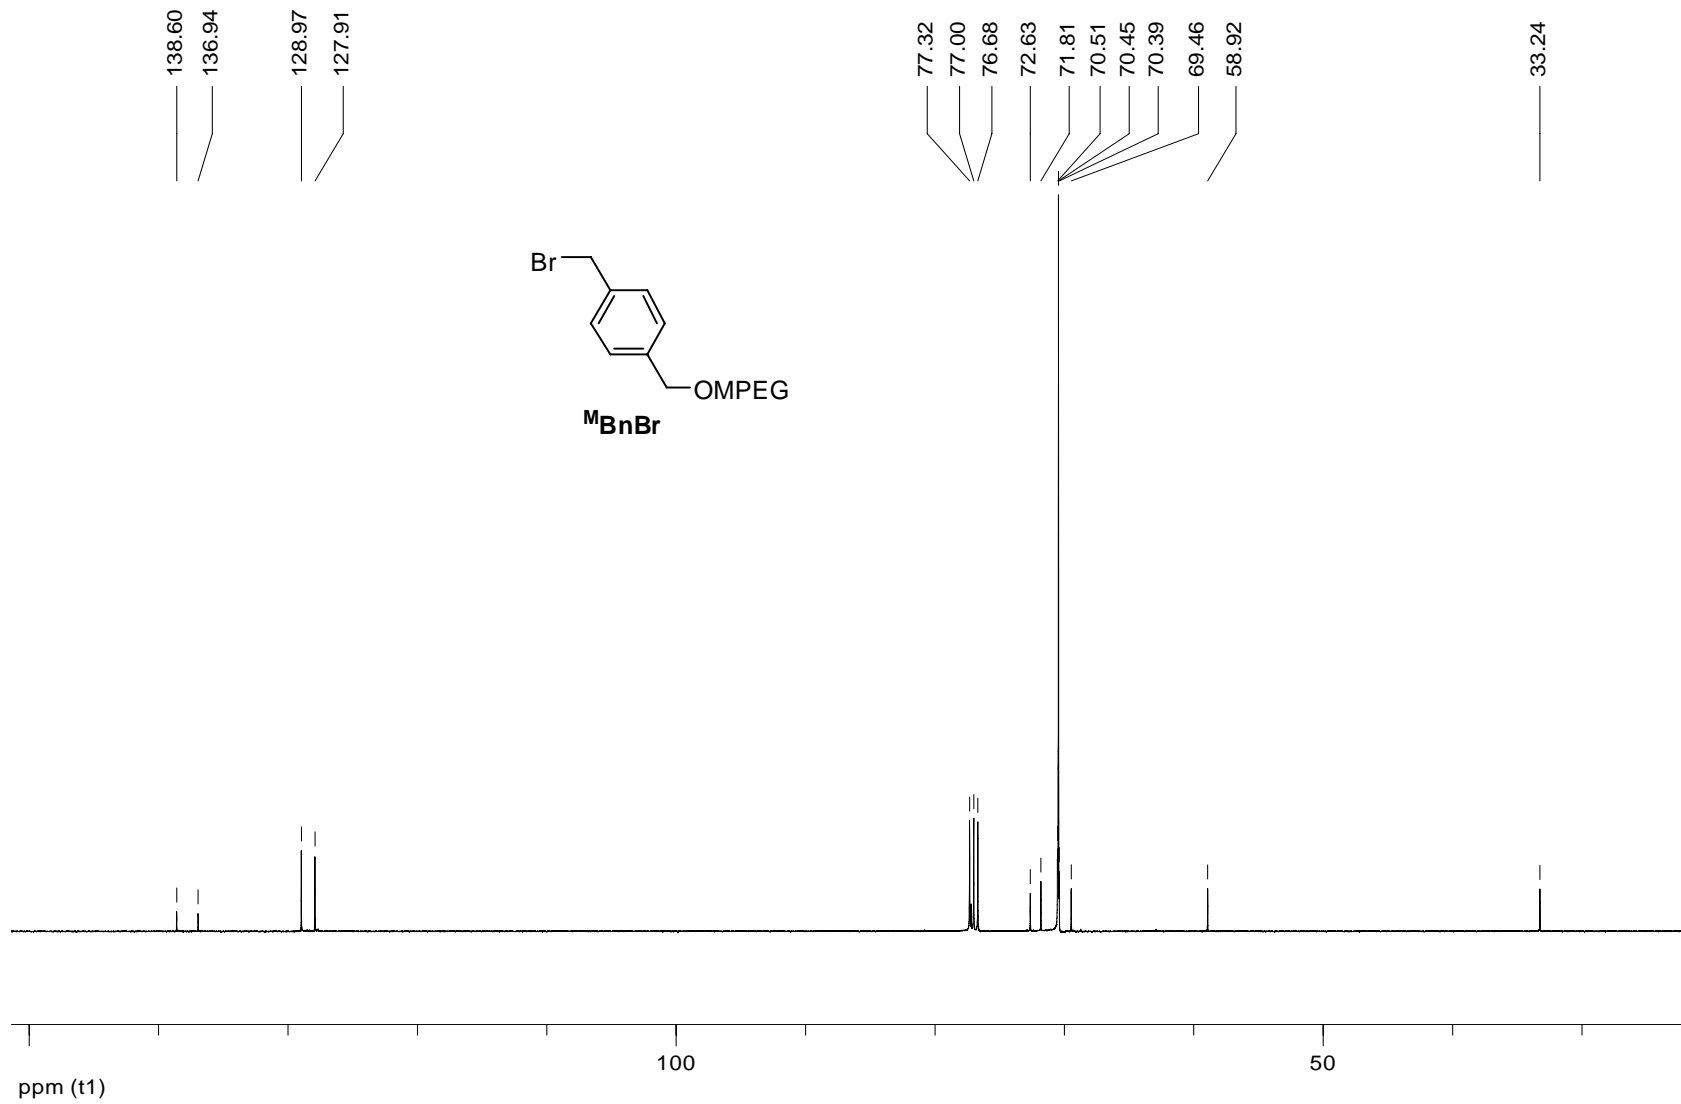

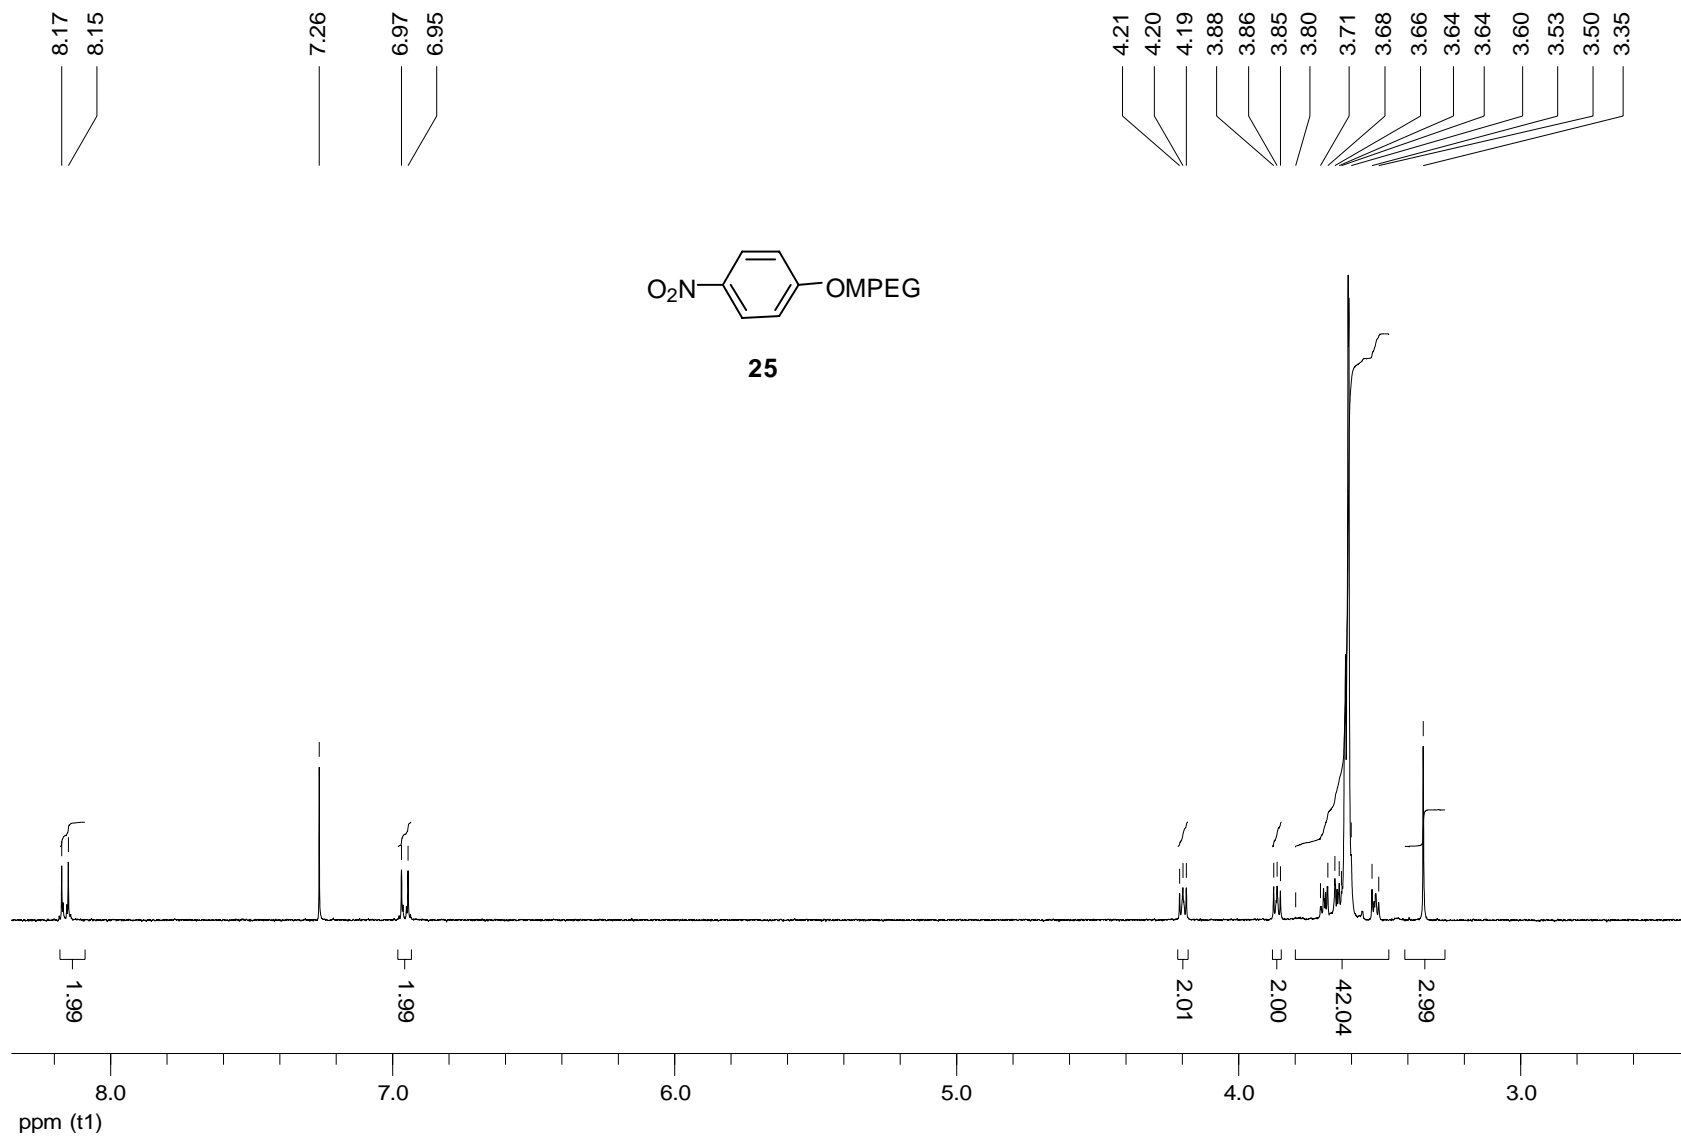

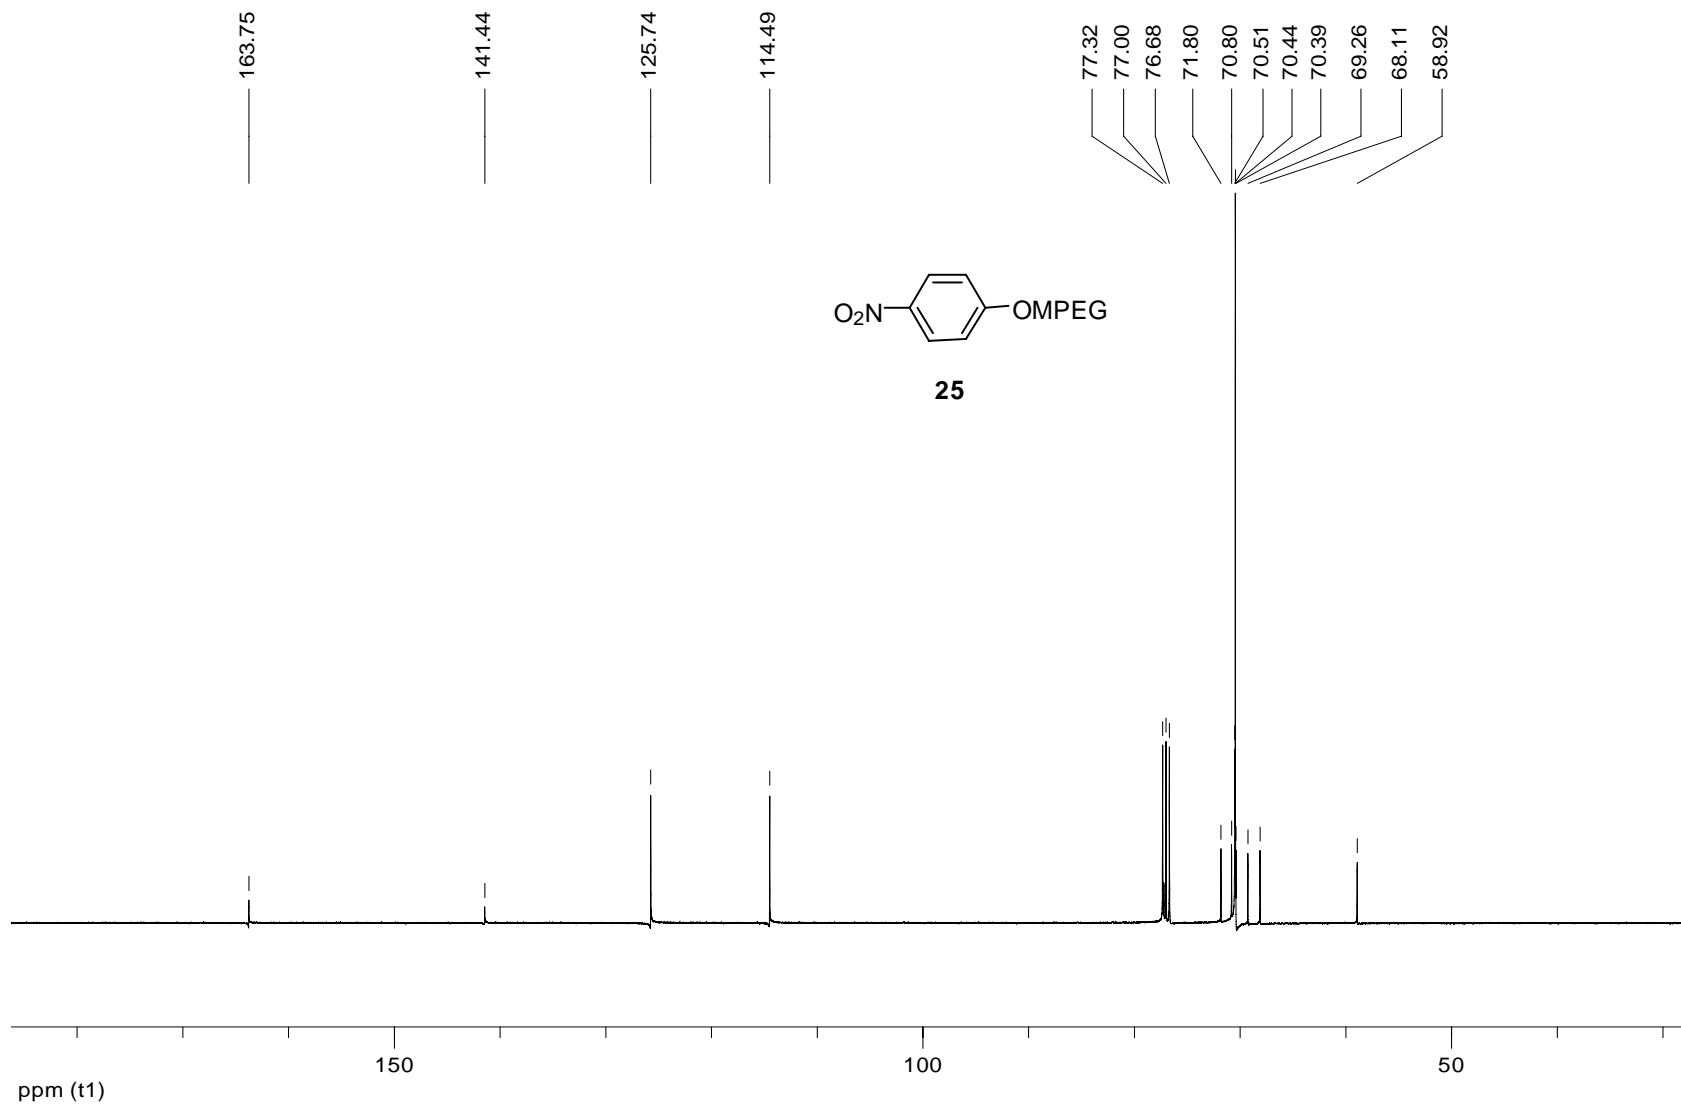

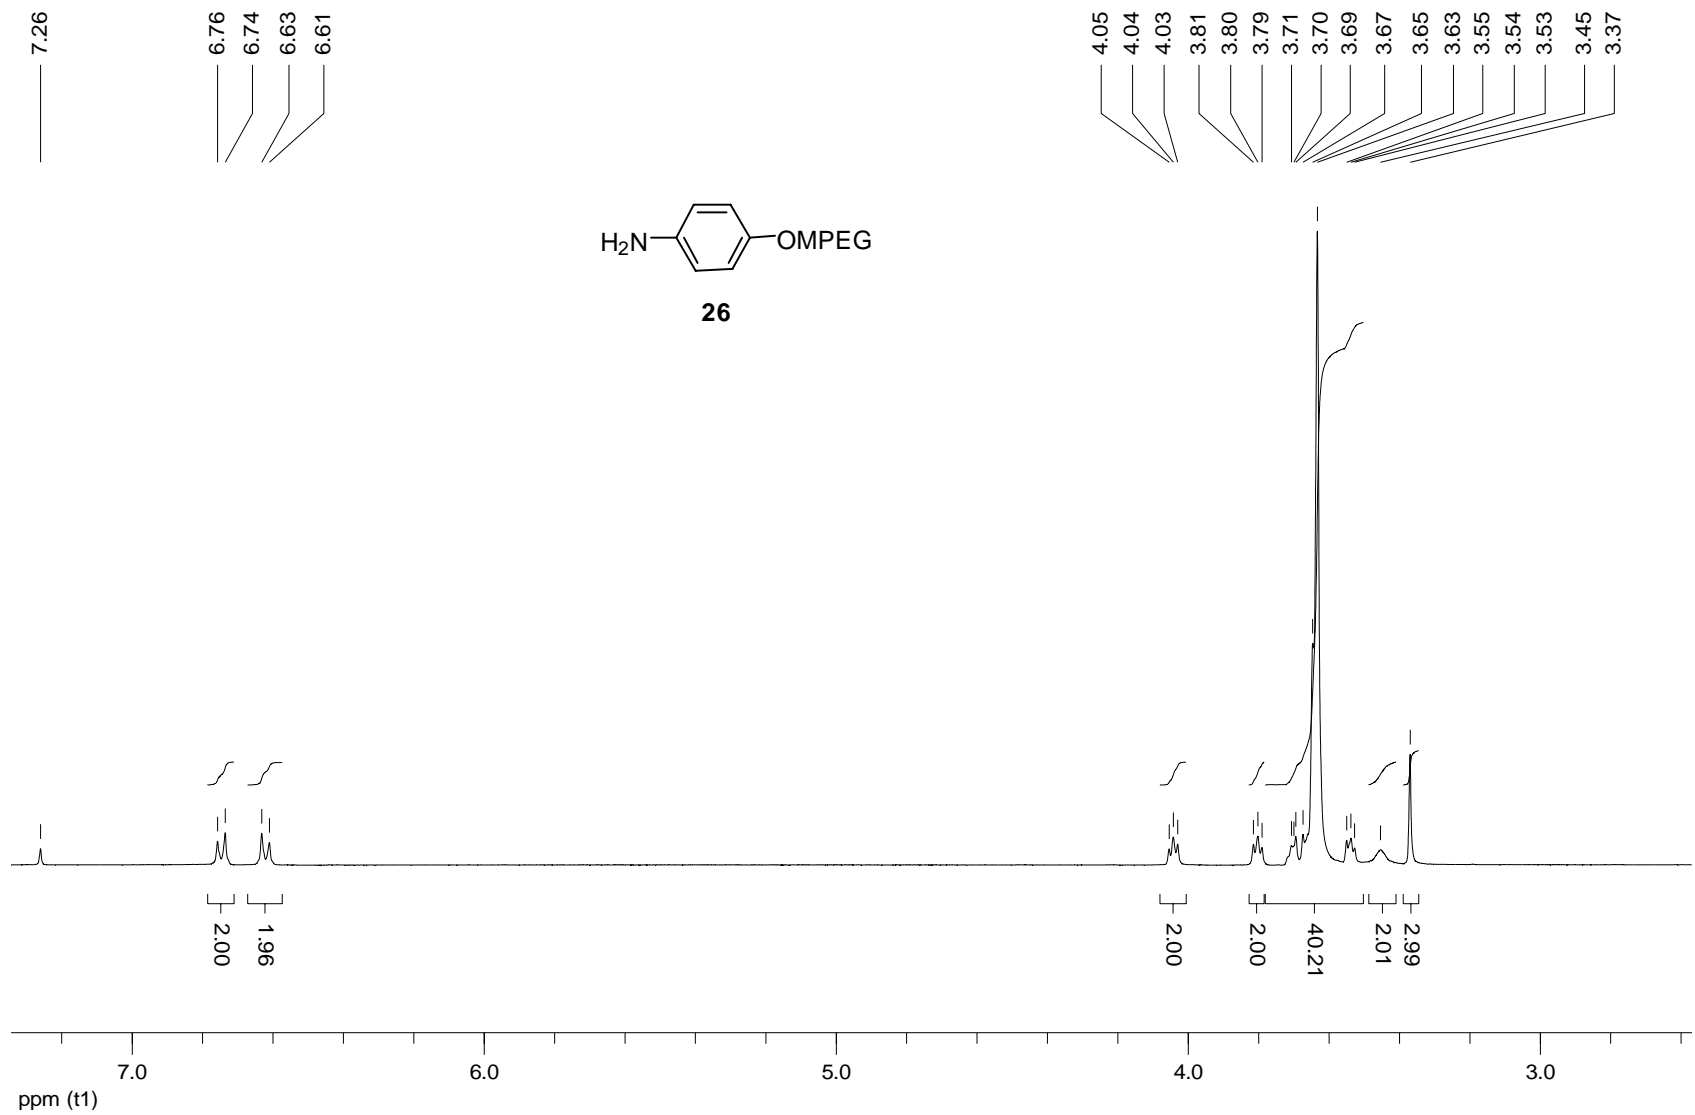



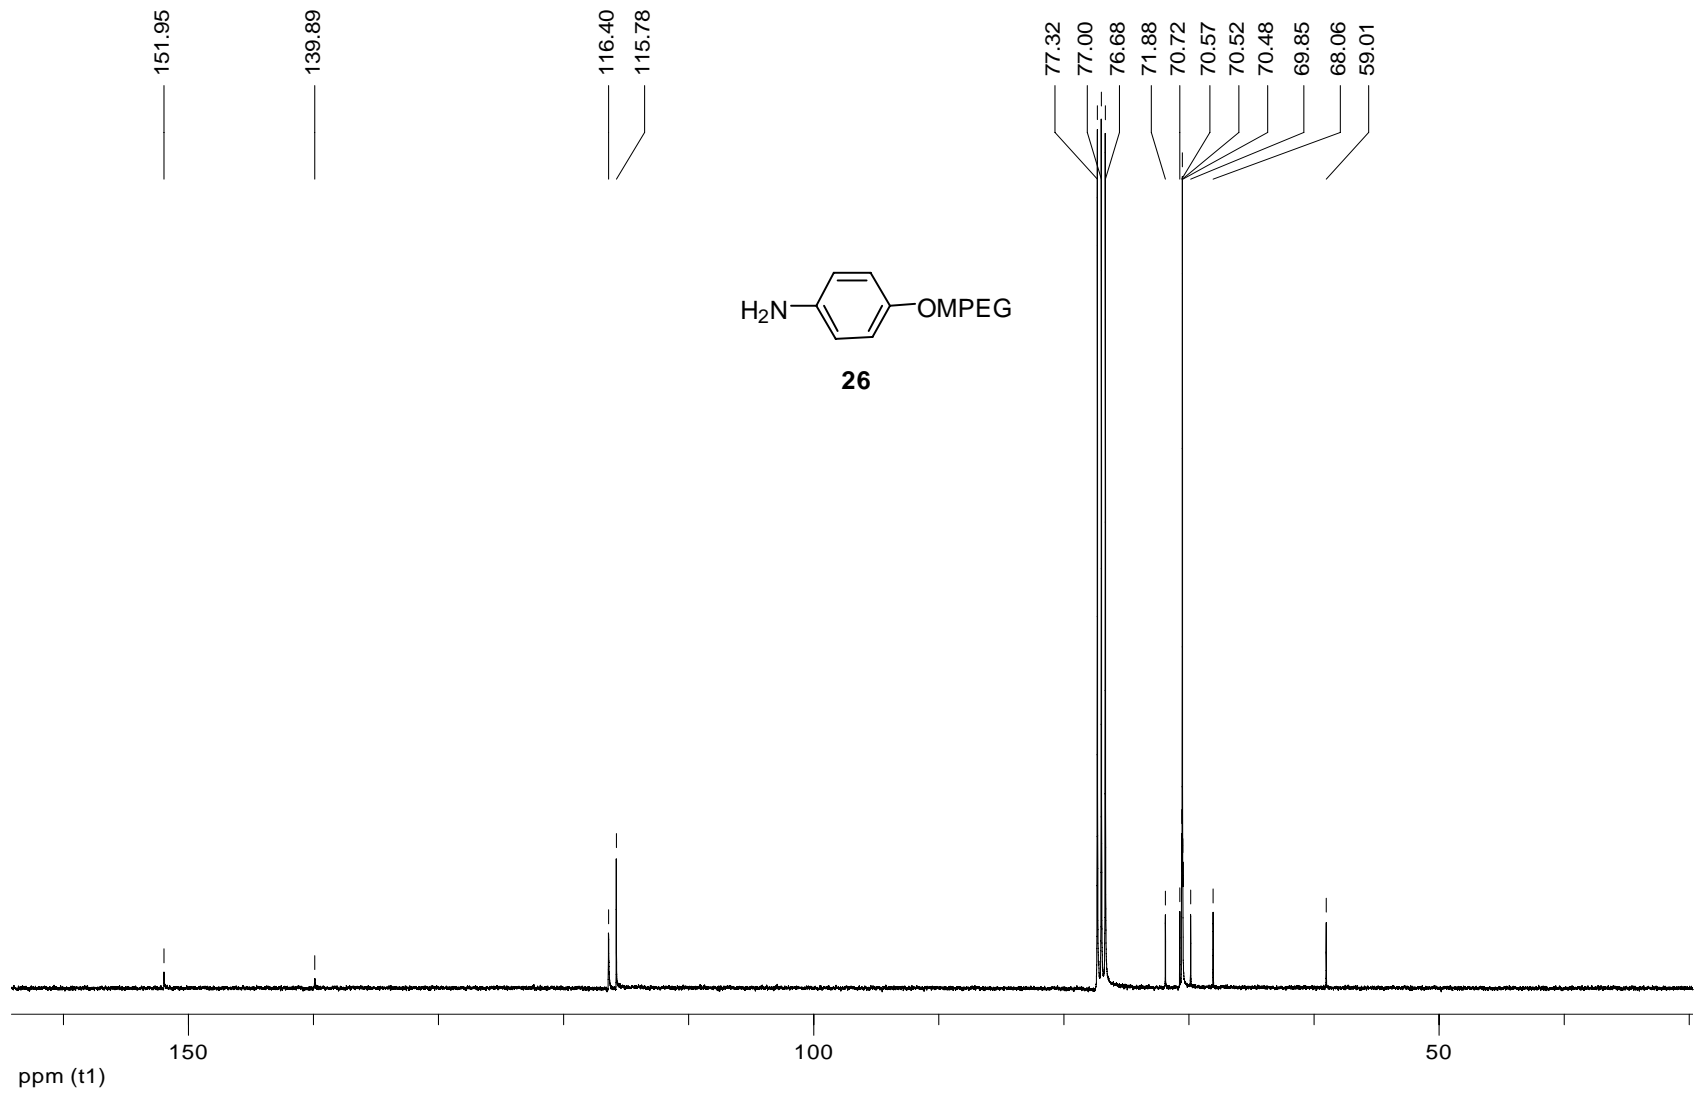

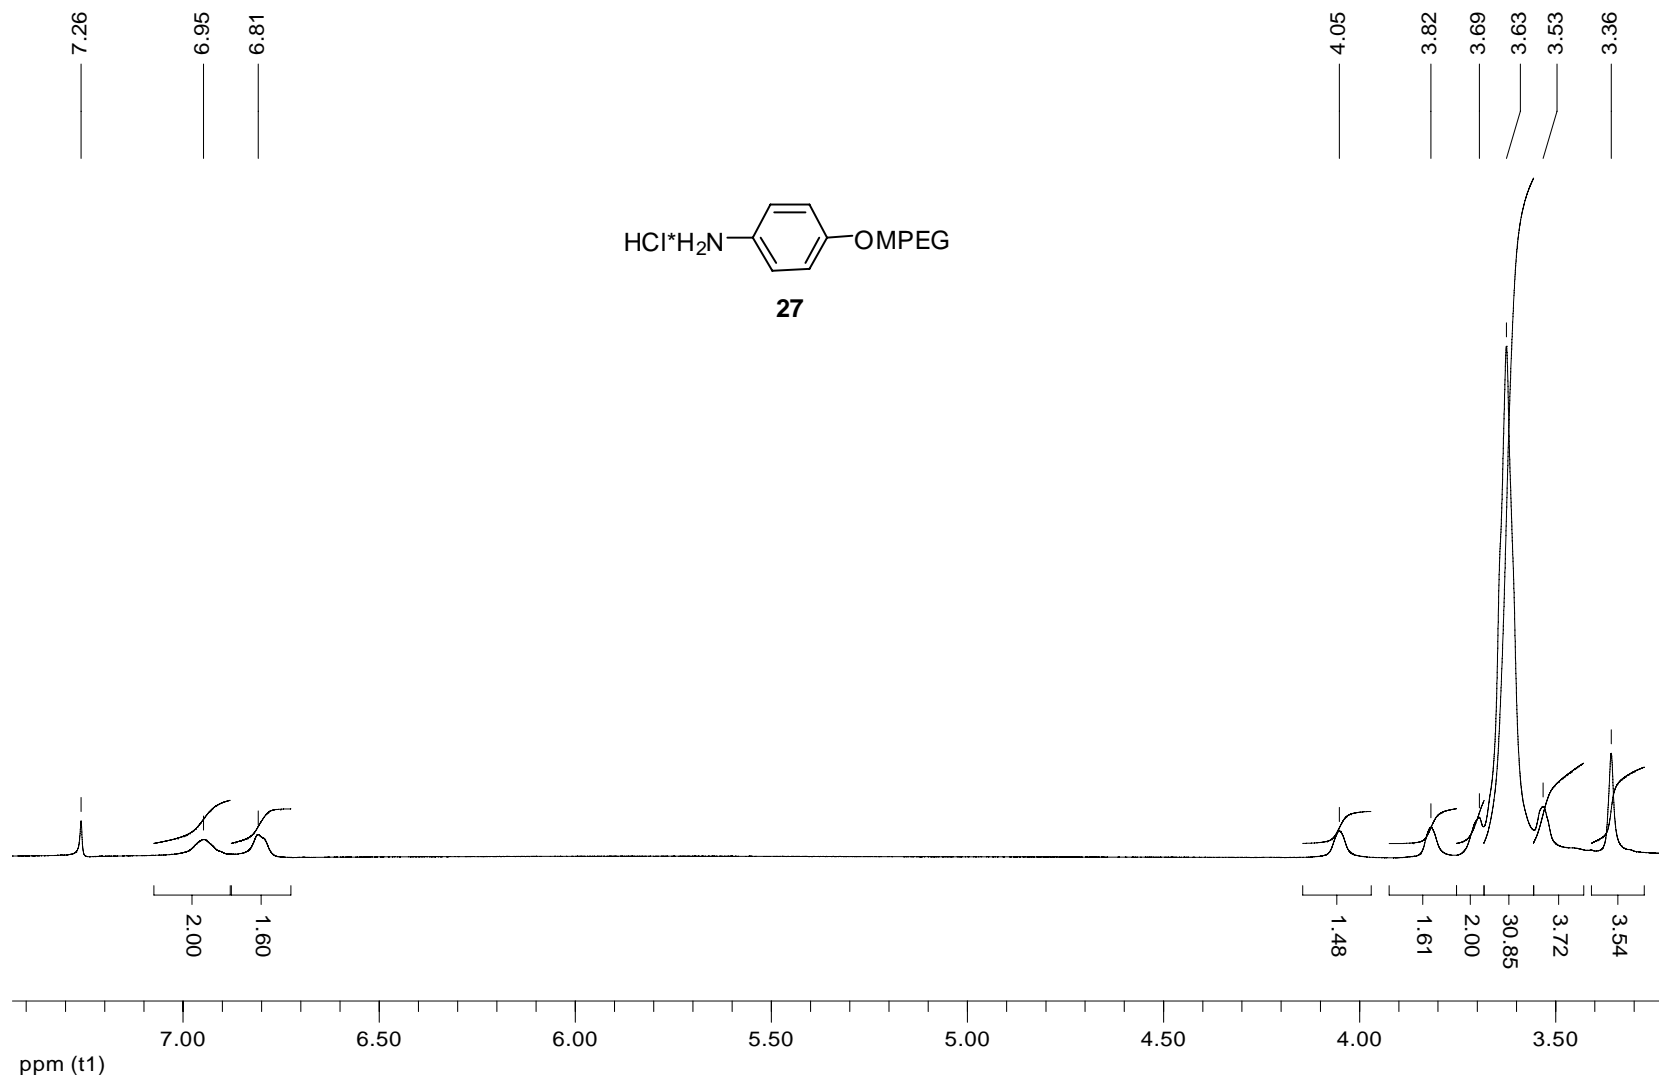

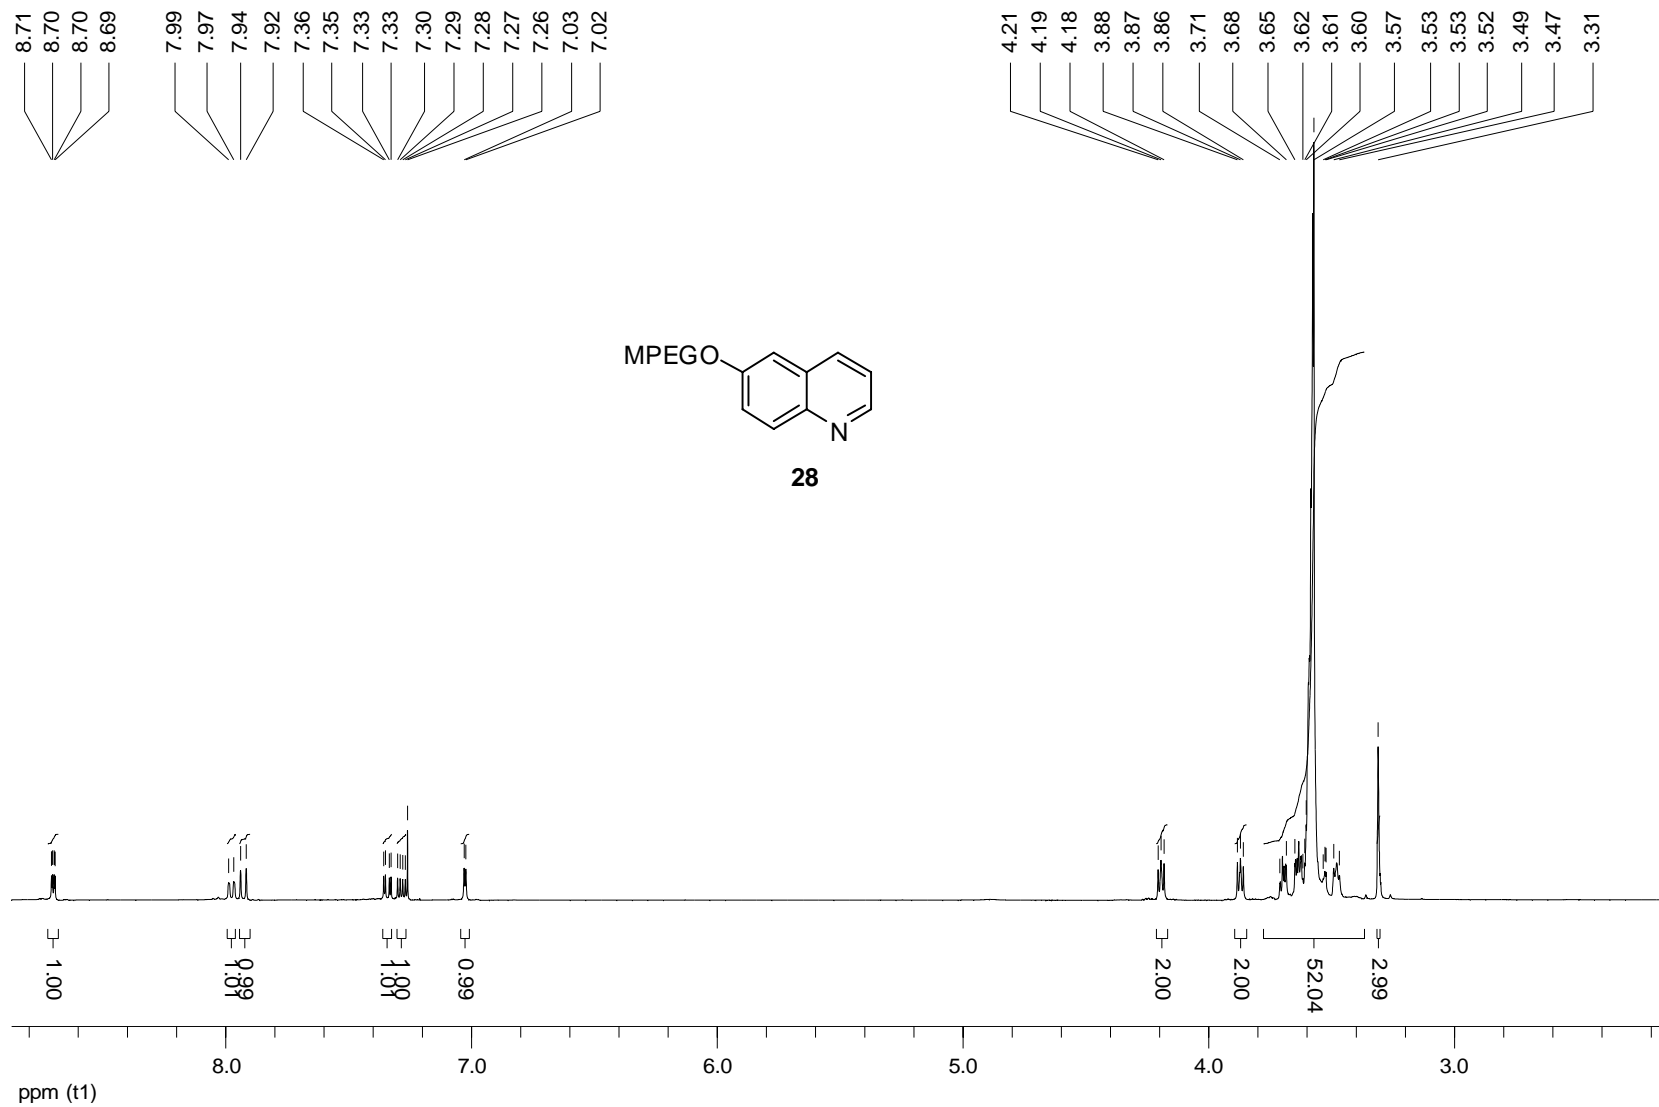

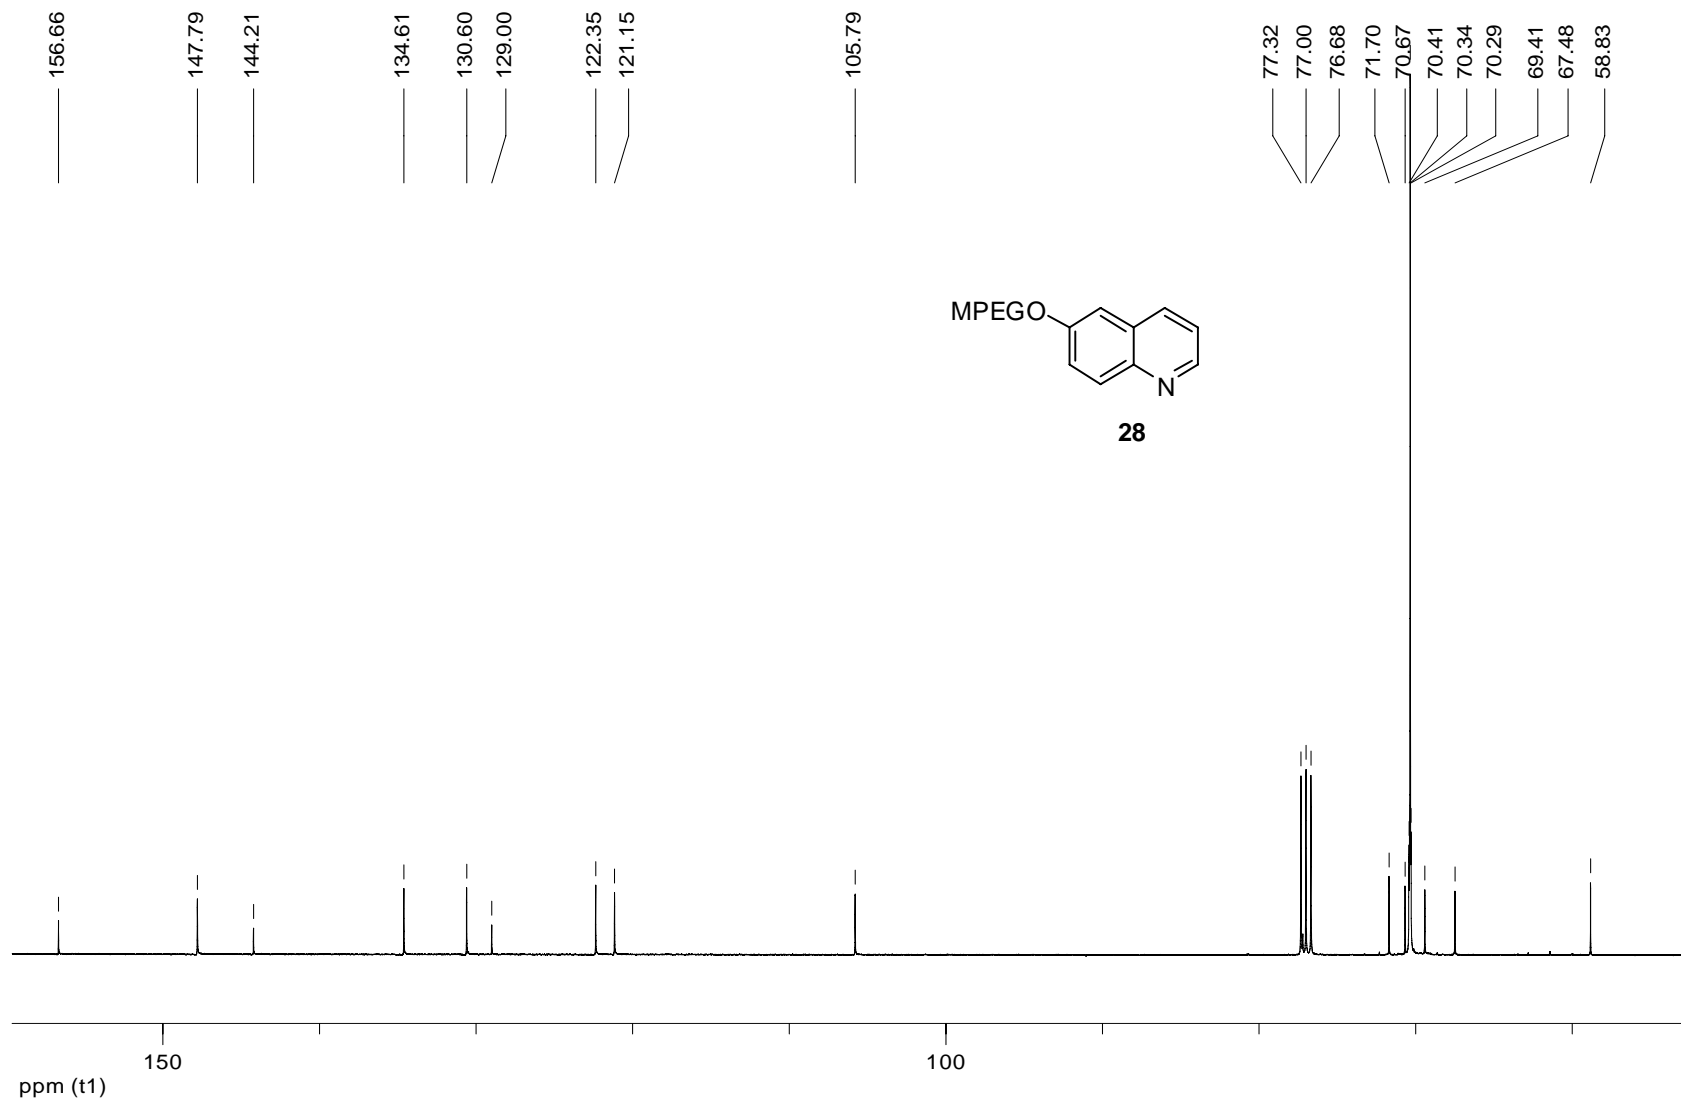

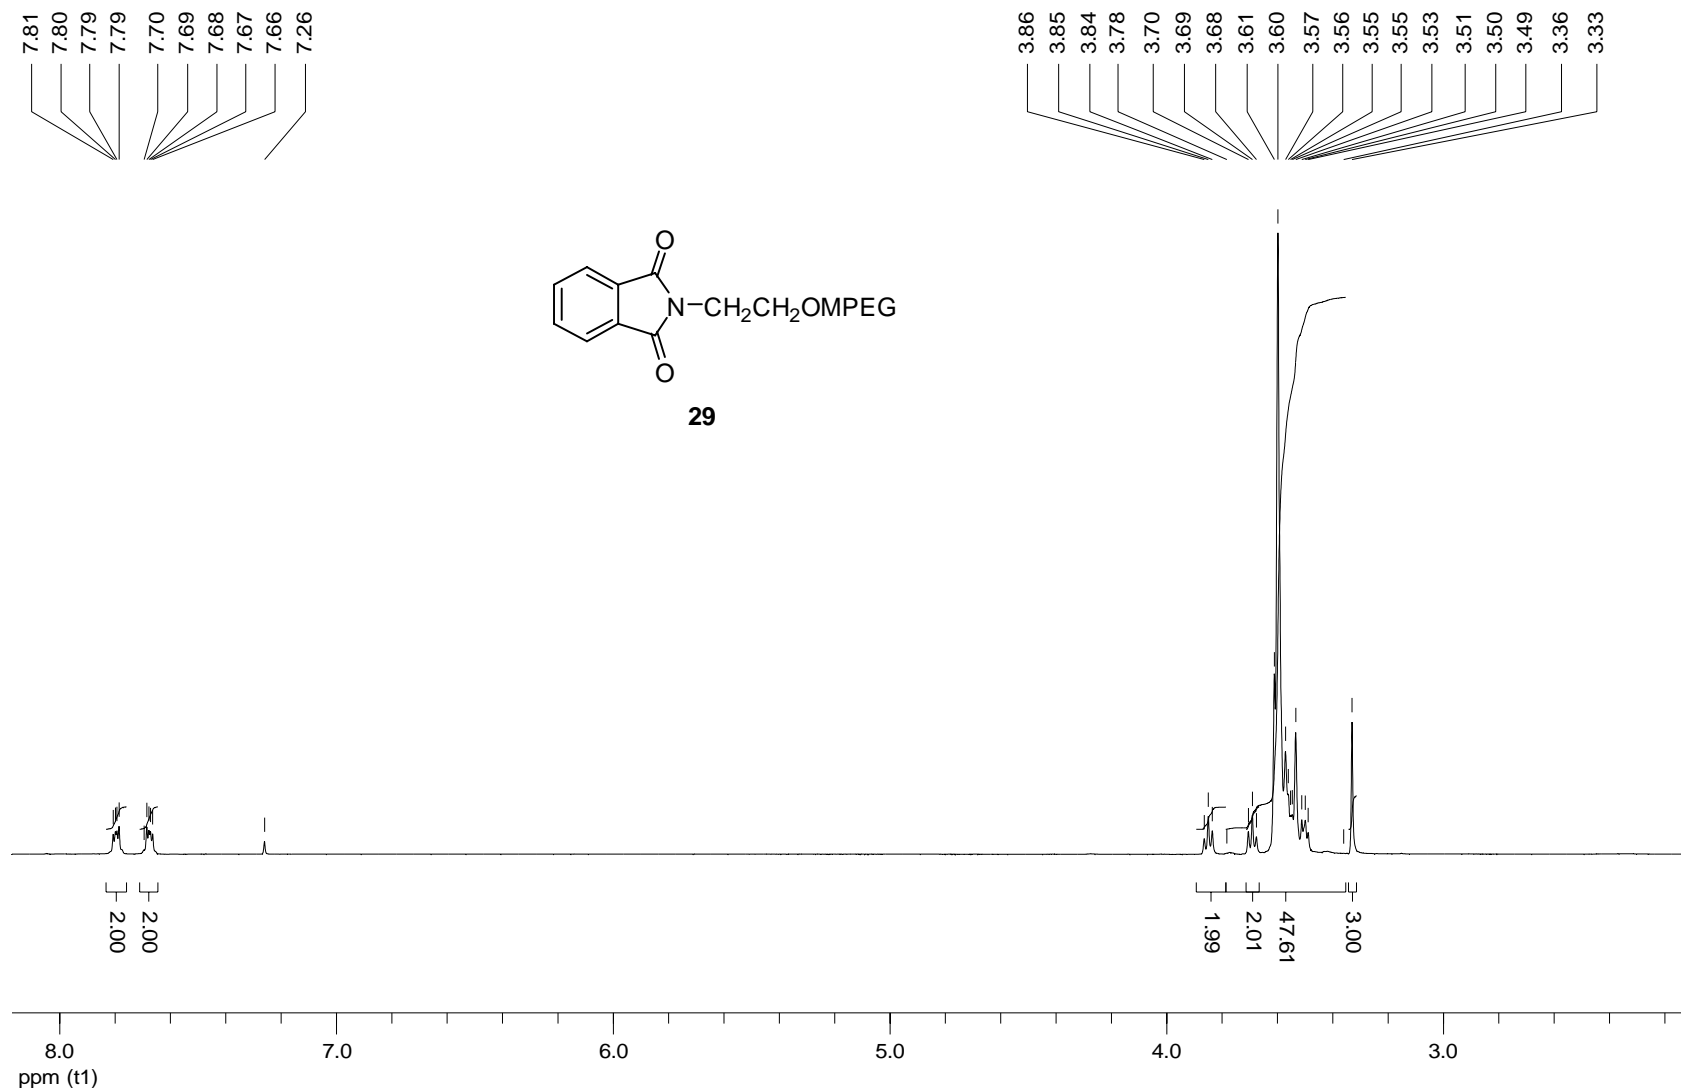

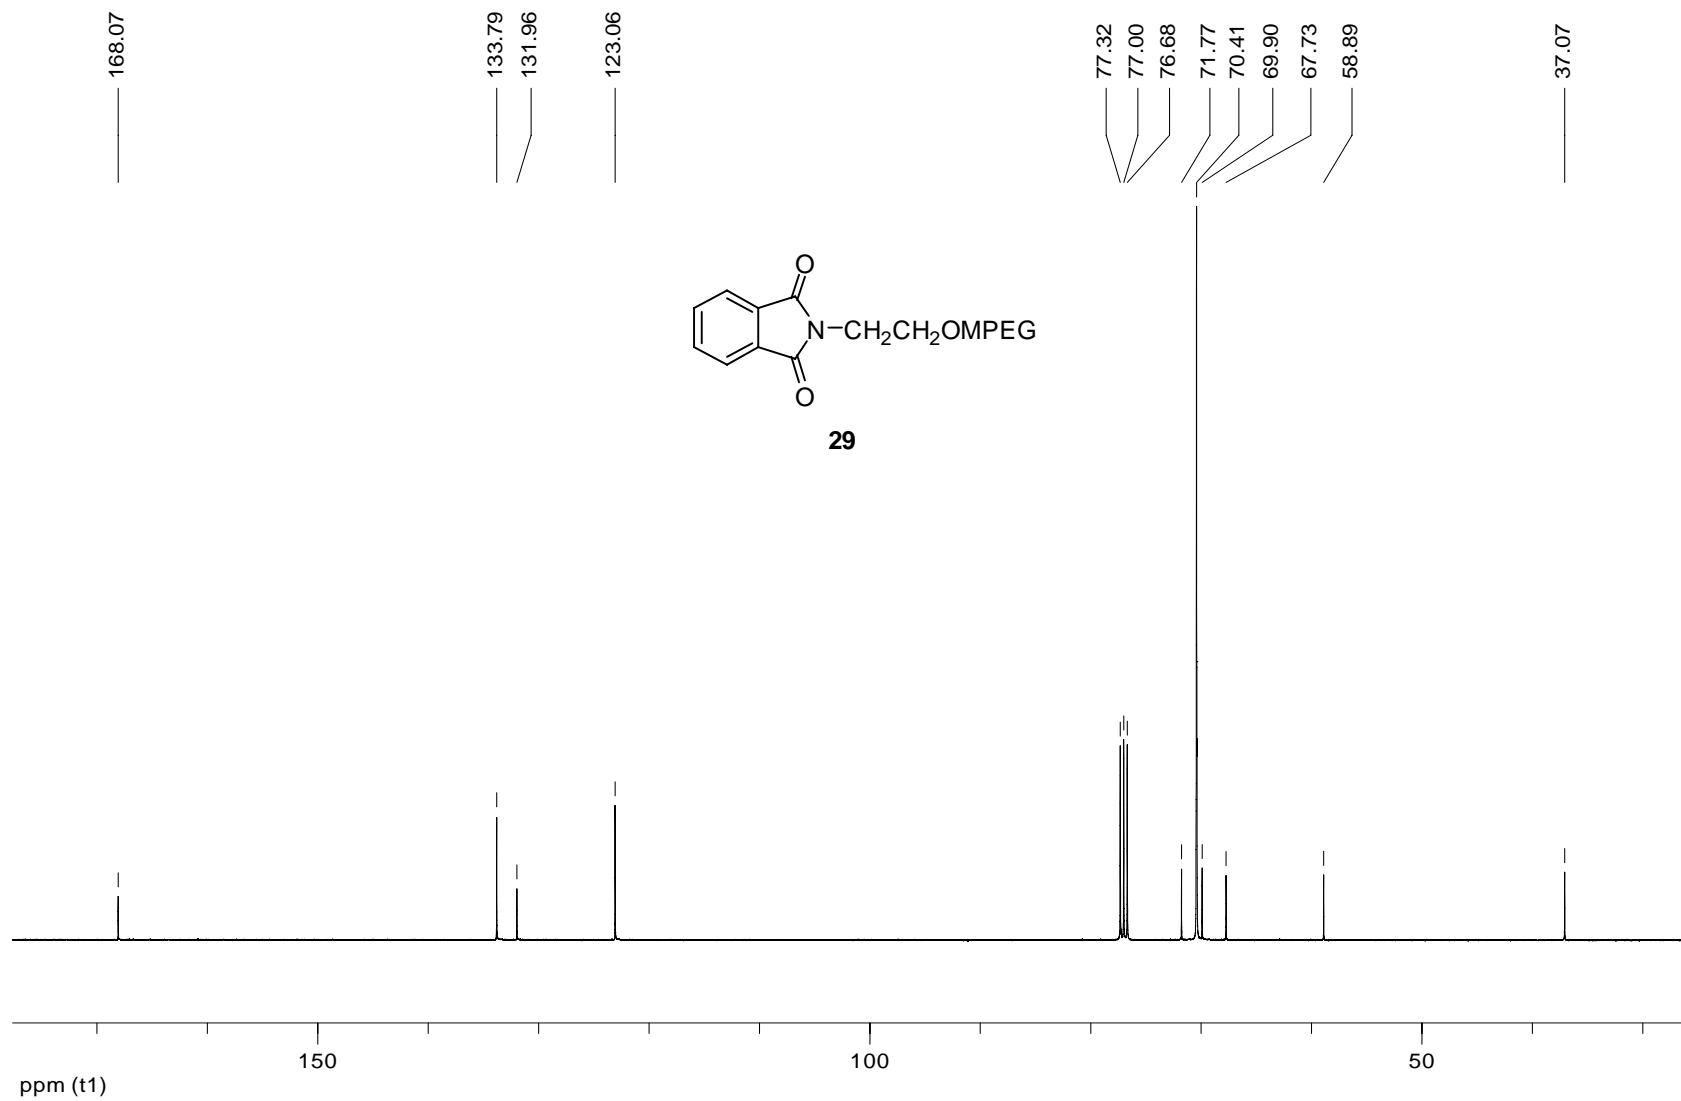

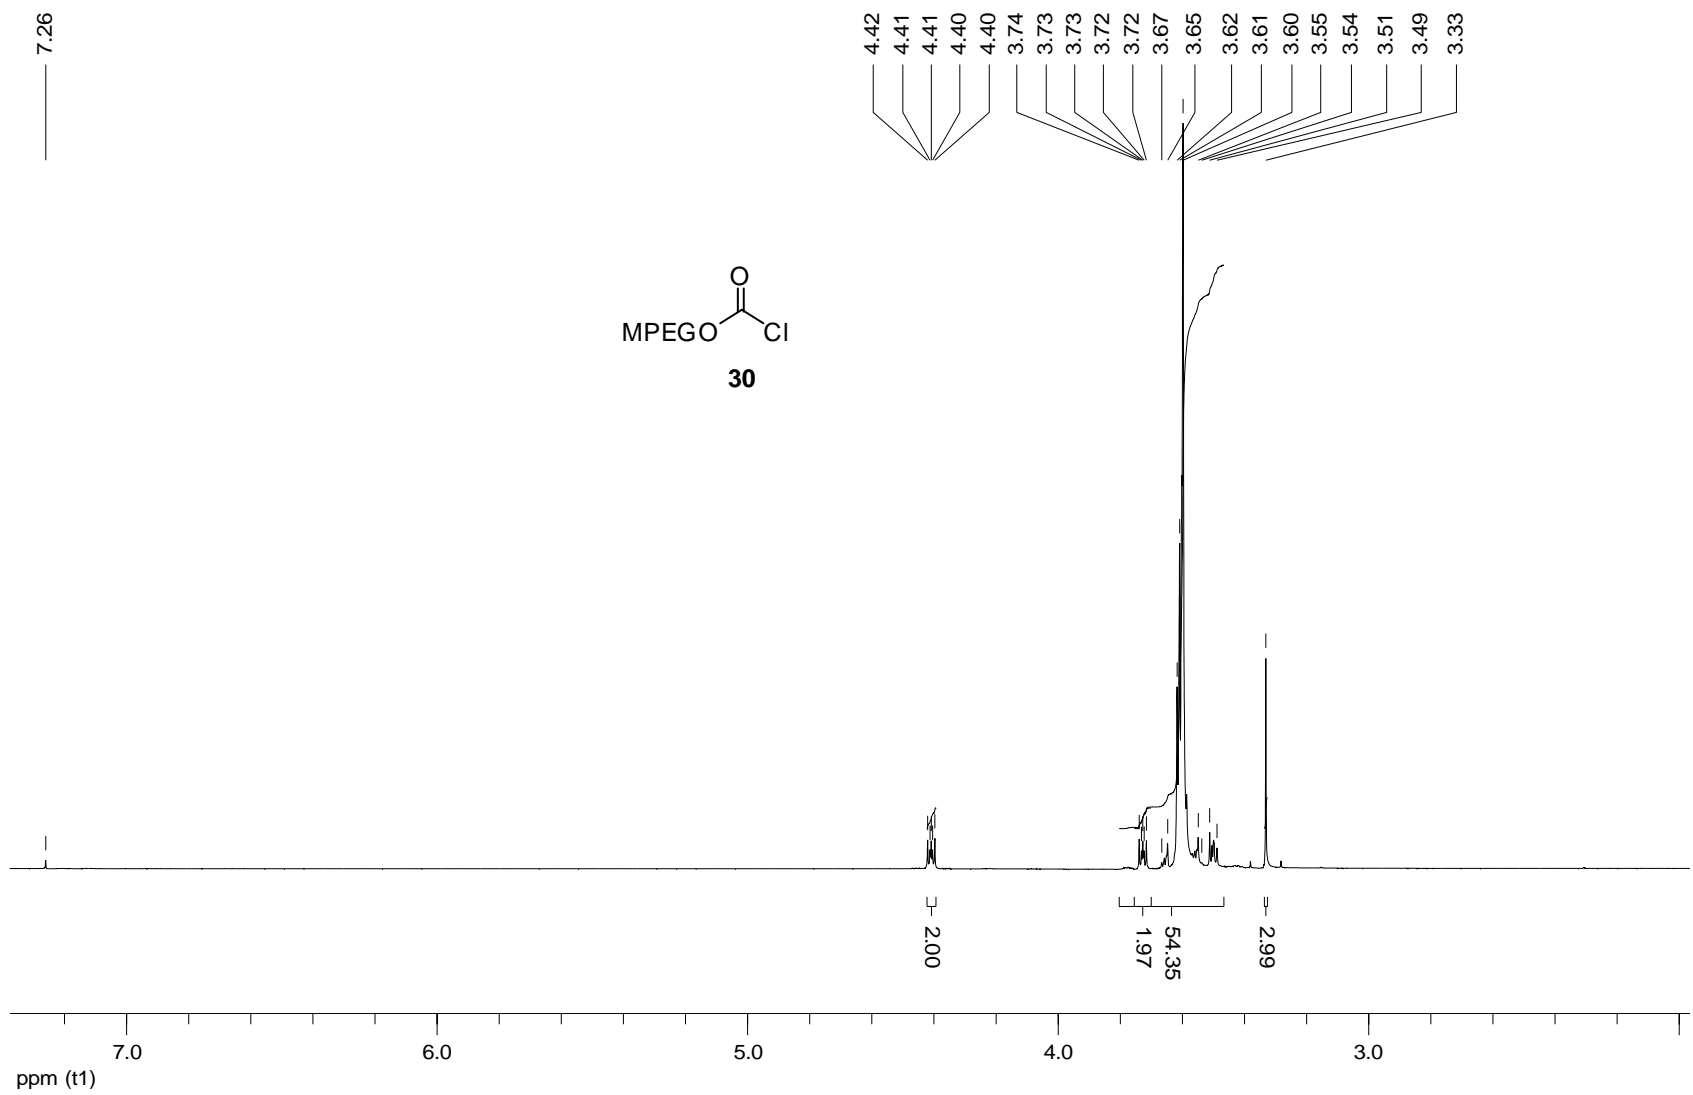

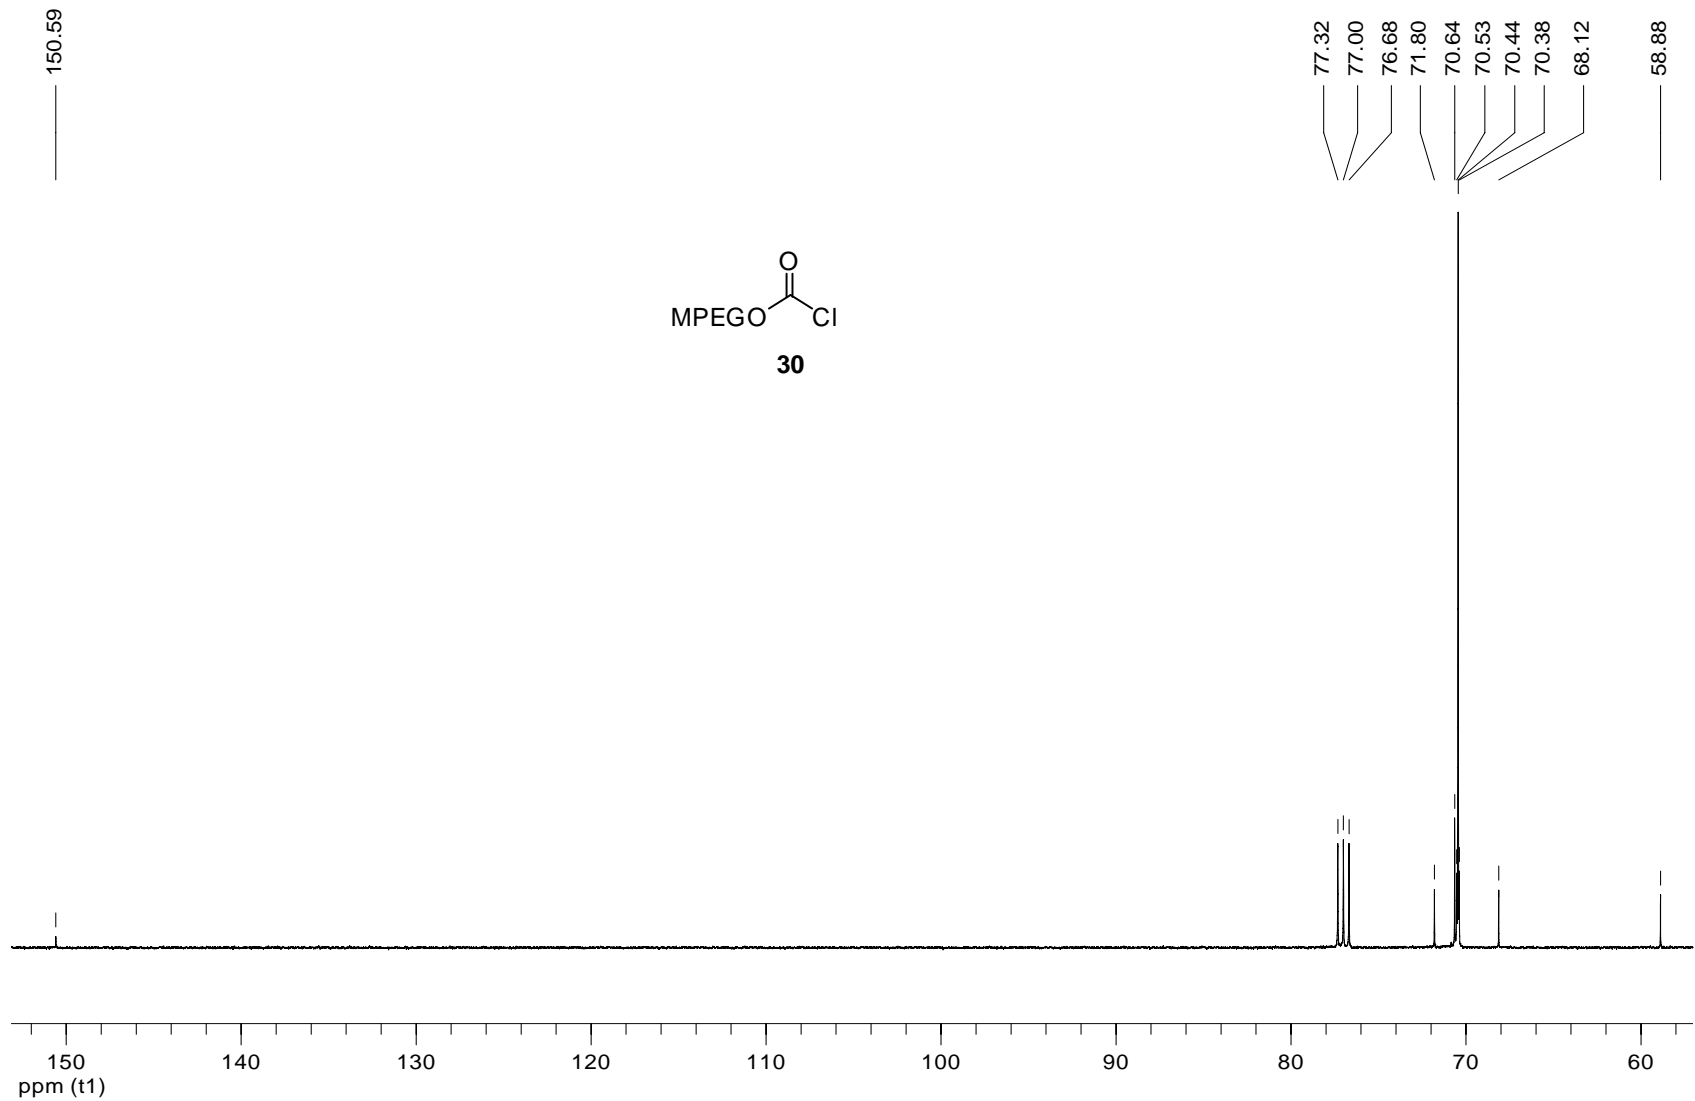



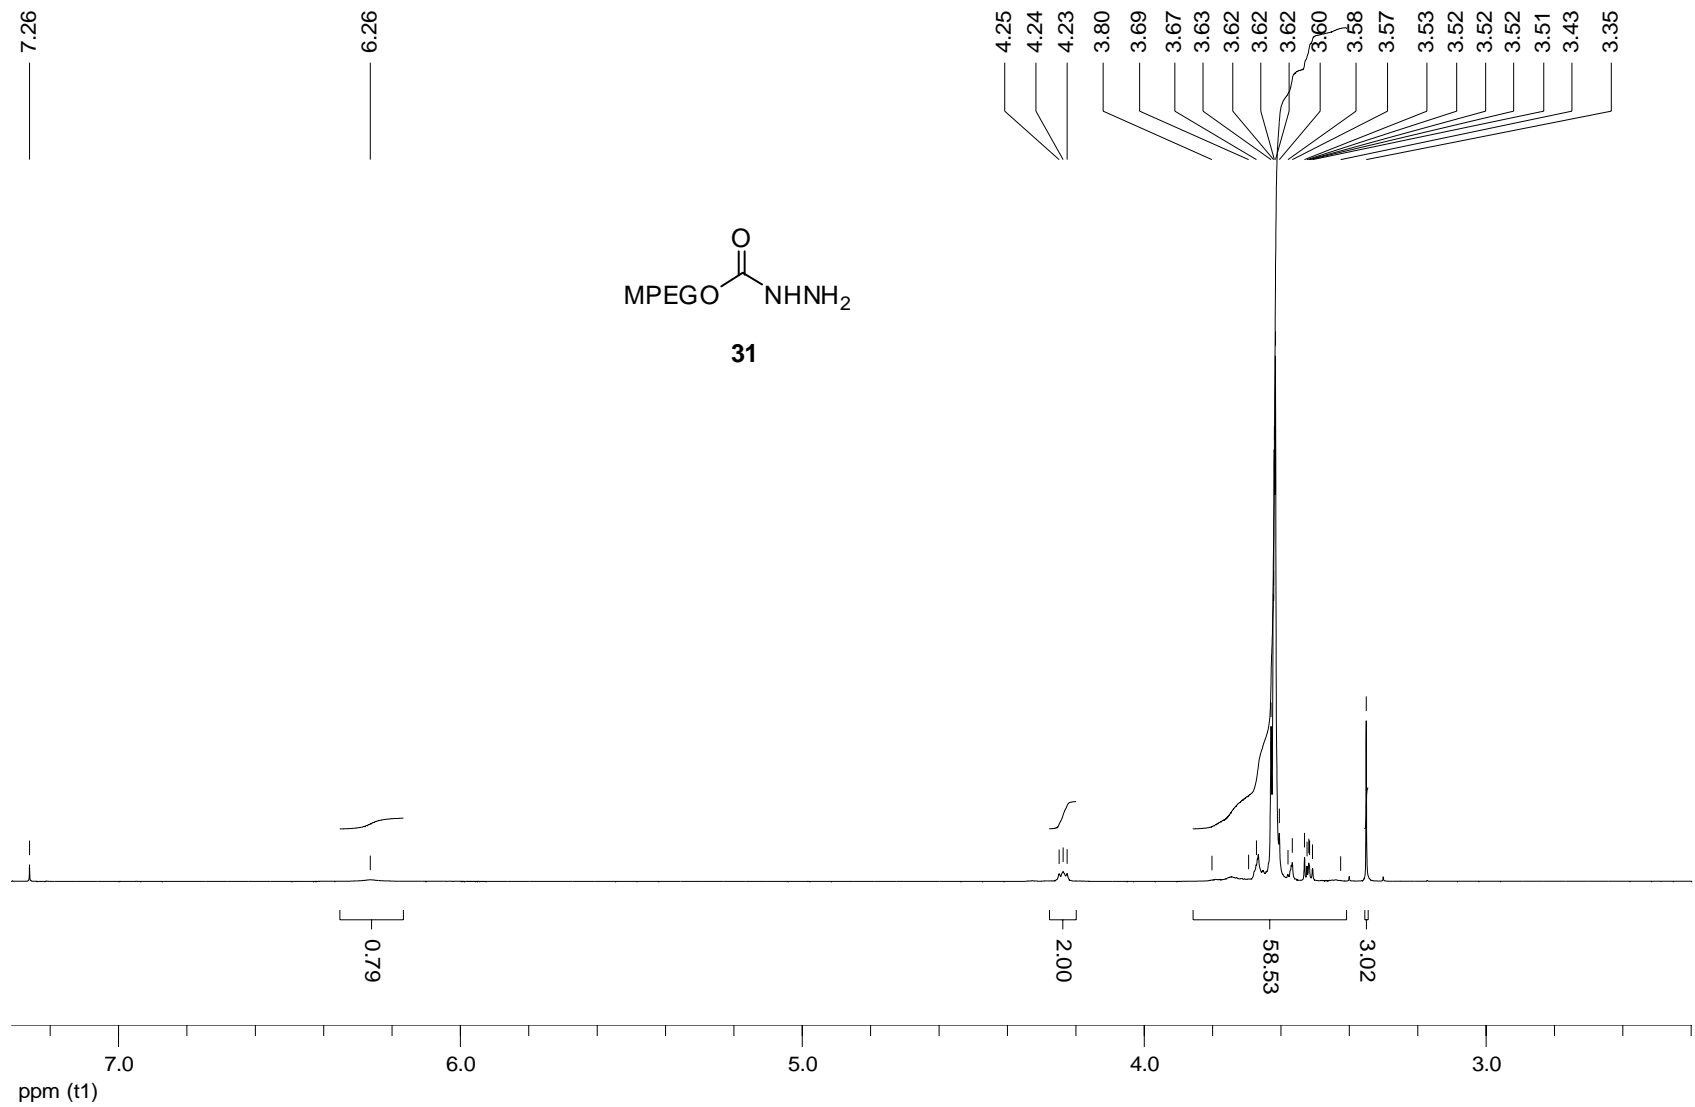

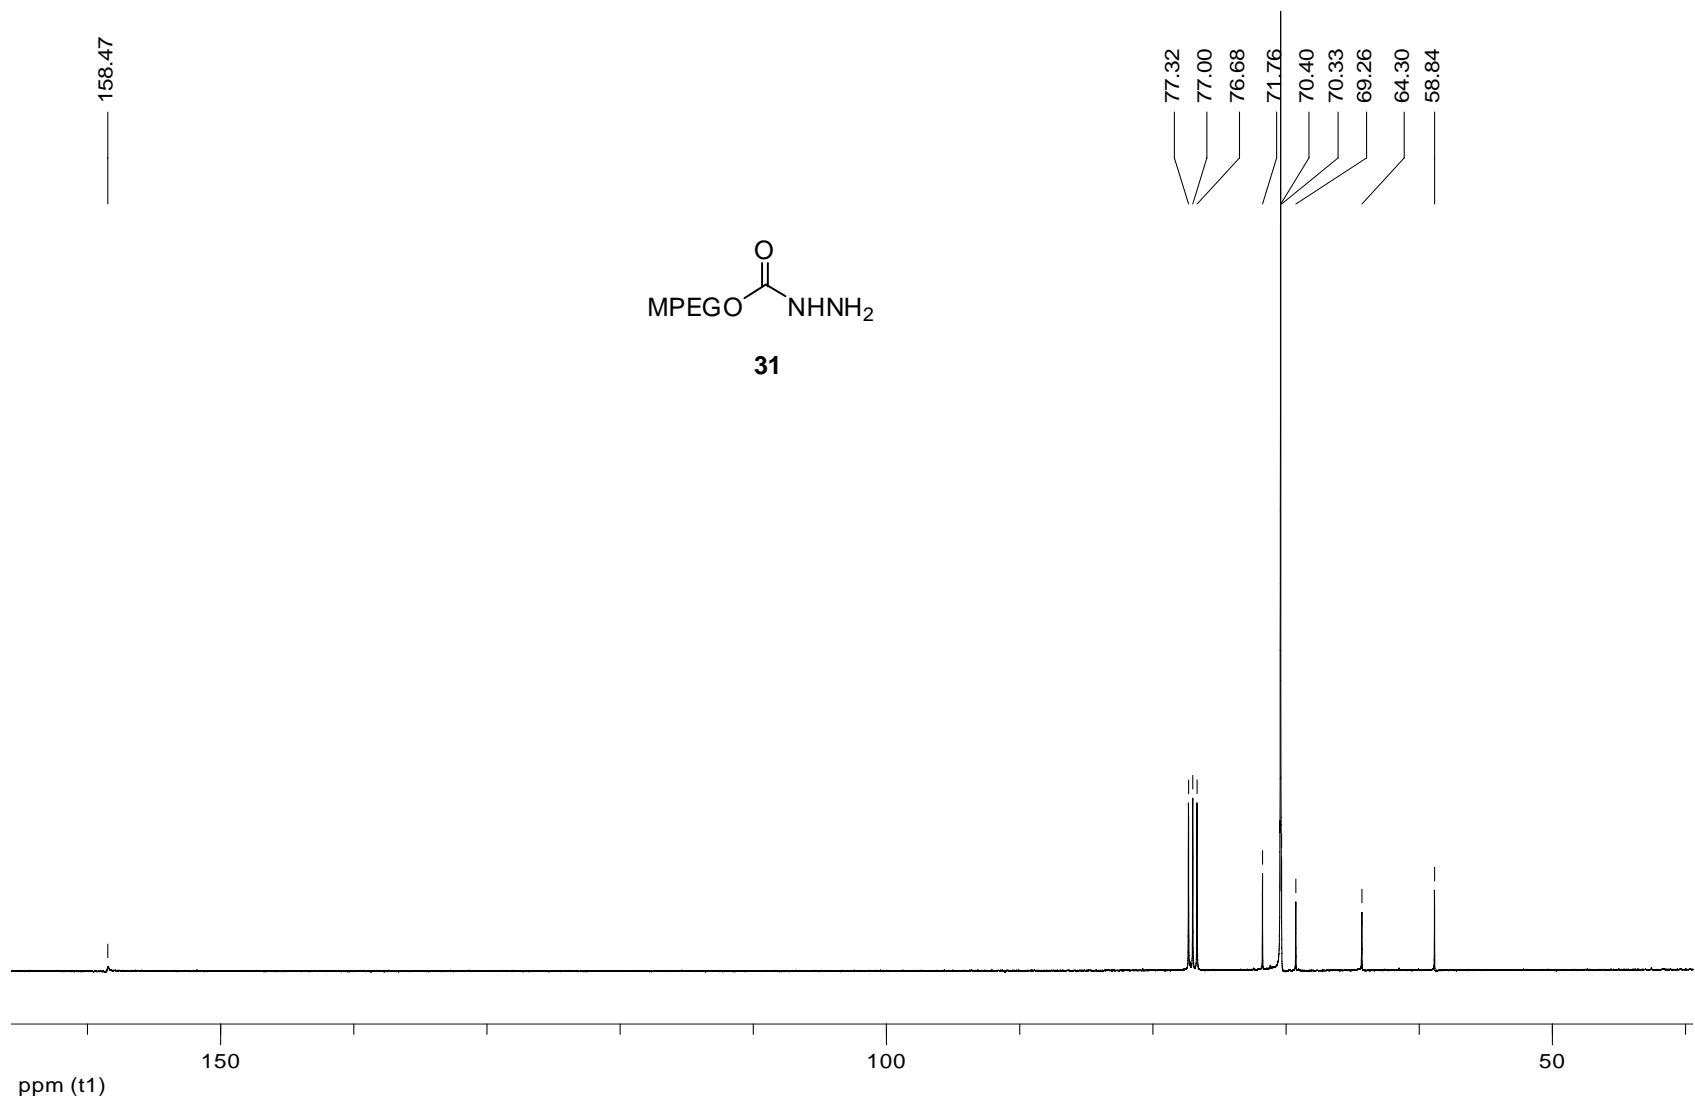

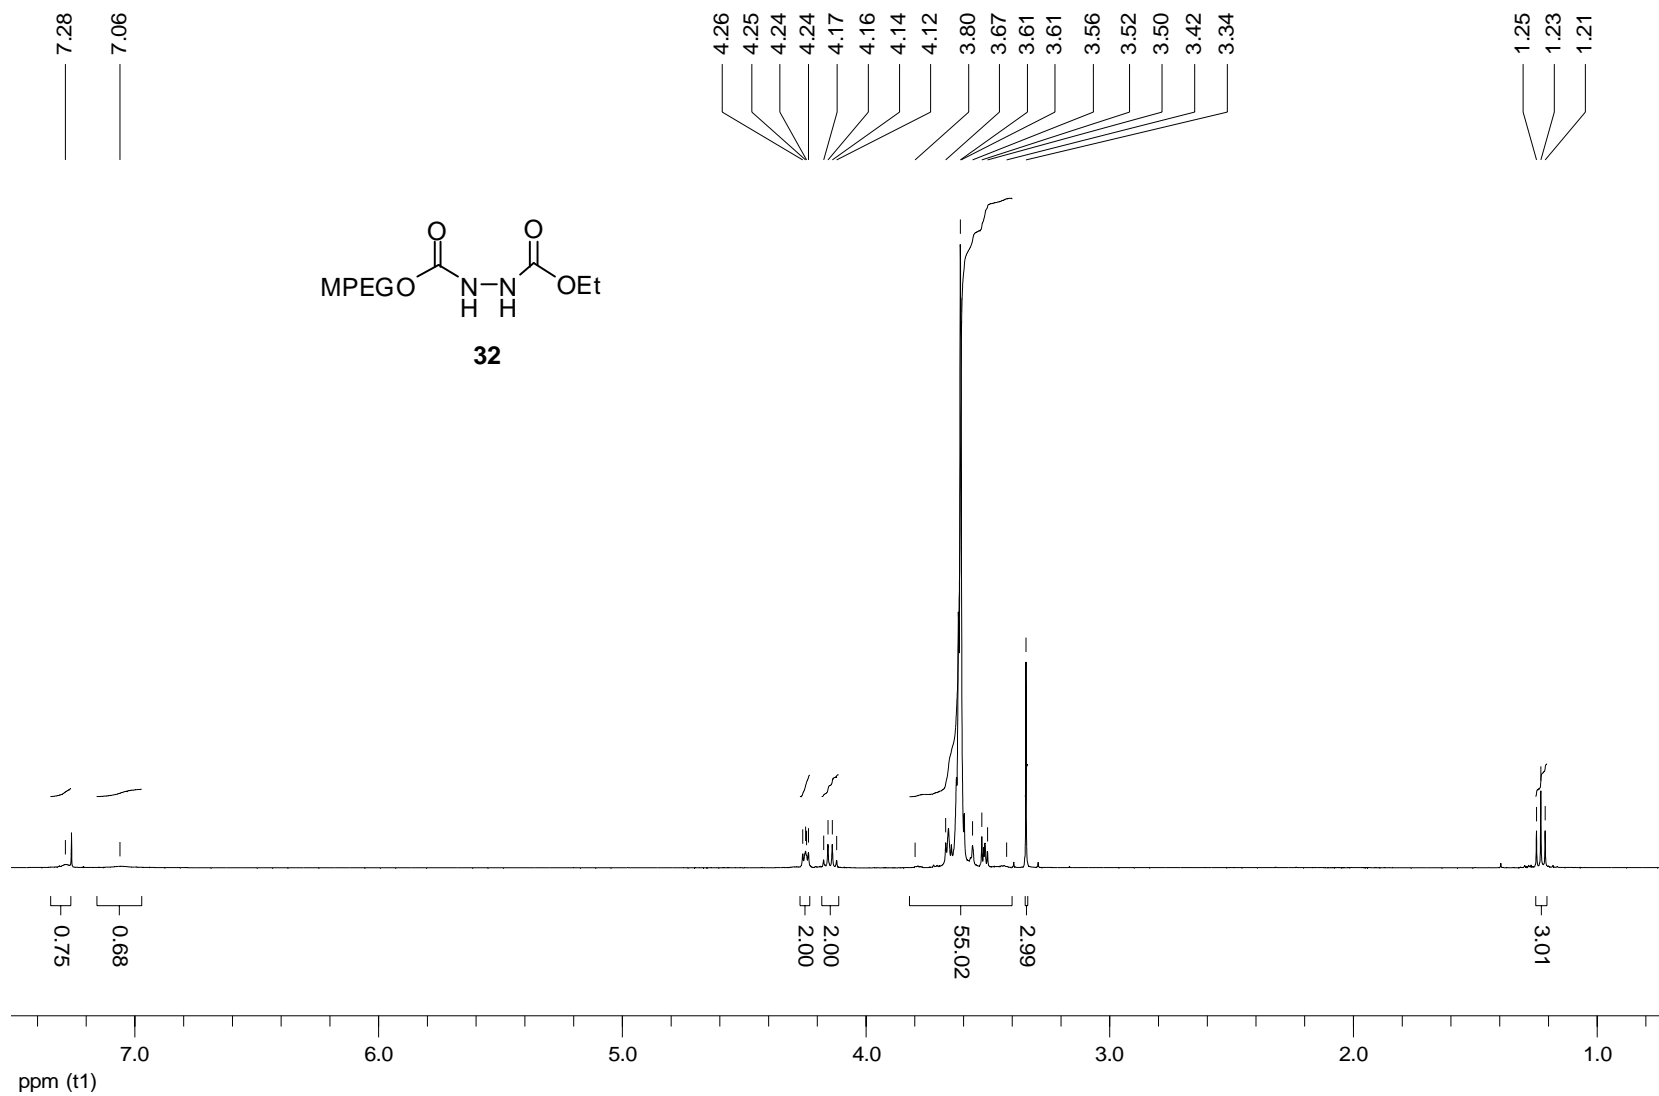

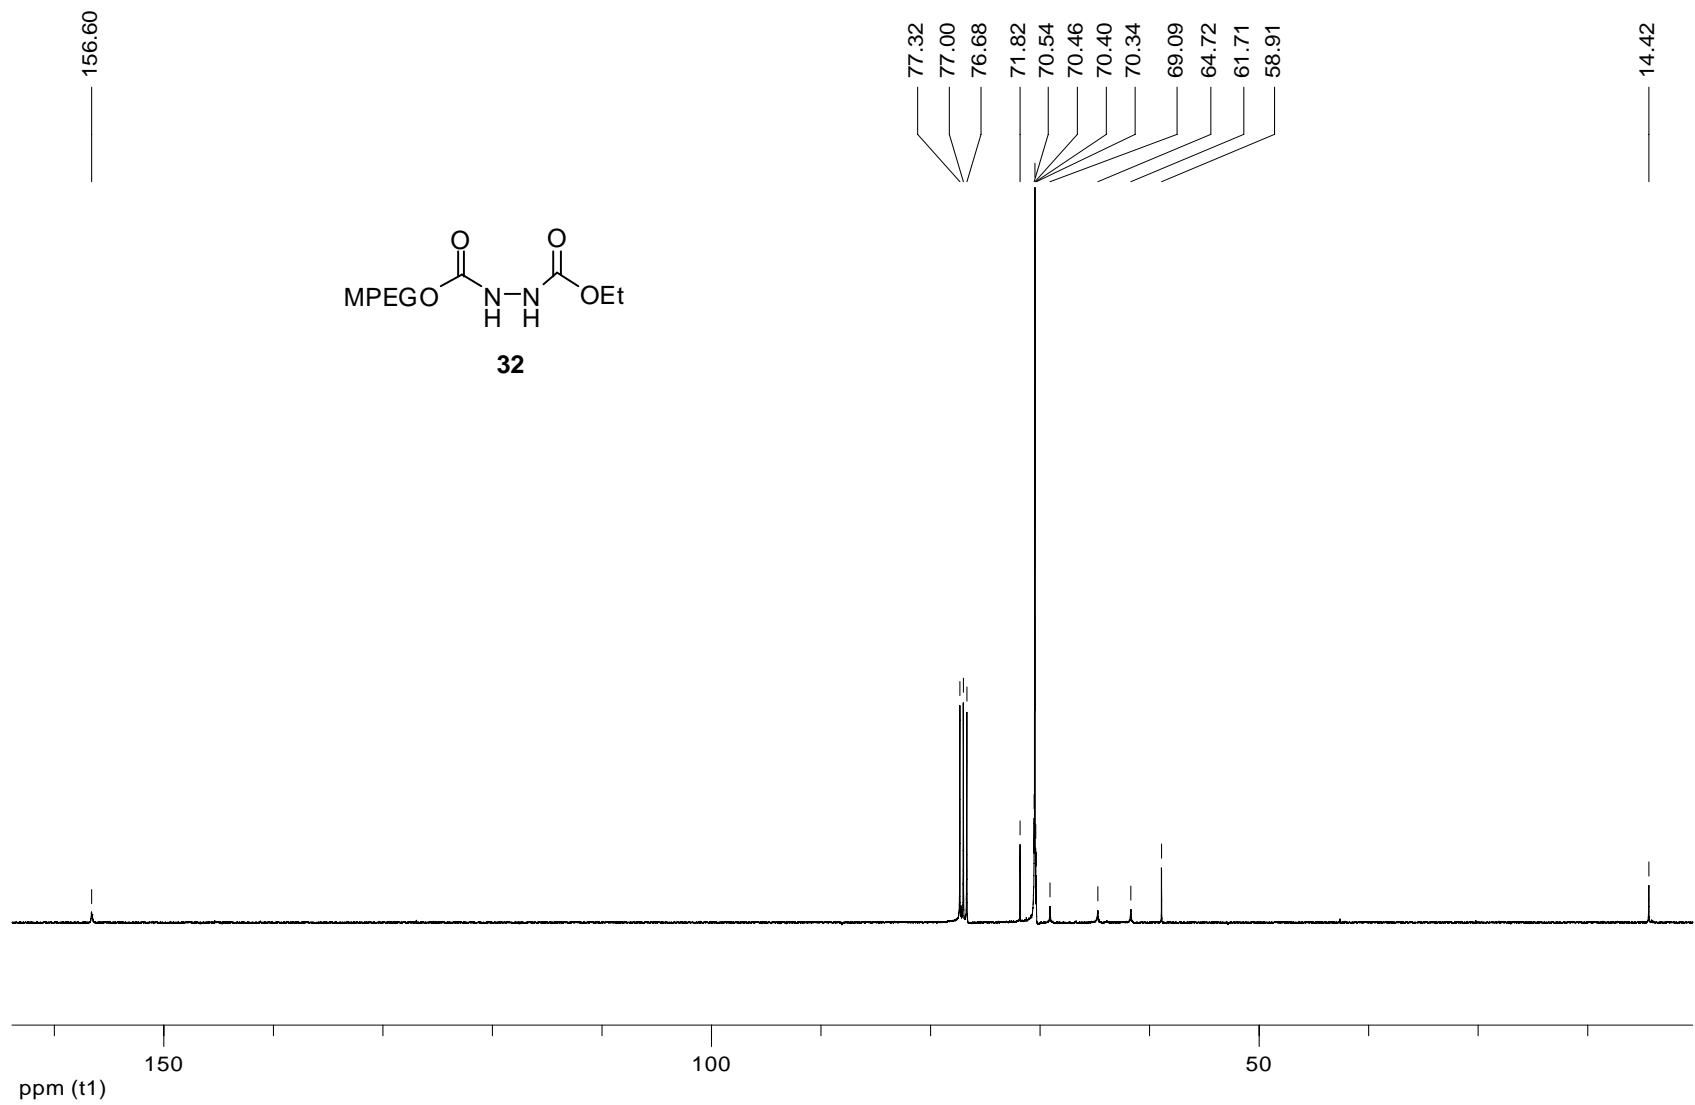

Supplement: figlushartley_nmr_reagents_esi2.pdf [file figlushartley_nmr_reagents_esi2.pdf]
